# Supplementary material for: Risk factors, symptom reporting, healthcare-seeking behaviour and adherence to public health guidance: protocol for Virus Watch, a prospective community cohort study
Source: PubMed Central journal article supplement (PMC8230990; doi:10.1136/bmjopen-2020-048042), 2021-06-23
Supplement: bmjopen-2020-048042.draft_revisions.pdf [file bmjopen-2020-048042.draft_revisions.pdf]

# BMJ Open

BMJ Open is committed to open peer review. As part of this commitment we make the peer review history of every article we publish publicly available.

When an article is published we post the peer reviewers' comments and the authors' responses online. We also post the versions of the paper that were used during peer review. These are the versions that the peer review comments apply to.

The versions of the paper that follow are the versions that were submitted during the peer review process. They are not the versions of record or the final published versions. They should not be cited or distributed as the published version of this manuscript.

BMJ Open is an open access journal and the full, final, typeset and author-corrected version of record of the manuscript is available on our site with no access controls, subscription charges or pay-per-view fees (<http://bmjopen.bmj.com>).

If you have any questions on BMJ Open's open peer review process please email [info.bmjopen@bmj.com](mailto:info.bmjopen@bmj.com)

# BMJ Open

## Risk factors, symptom reporting, healthcare-seeking behaviour and adherence to public health guidance: protocol for Virus Watch, a prospective community cohort study

|                               |                                                                                                                                                                                                                                                                                                                                                                                                                                                                                                                                                                                                                                                                                                                                                                                                                                                                                                                                                                                                                                                                                                                                                                                                                                                                                                                                                                                                                                                                                                                                                                                                                                                                                                                                                                                                                                                                                                                                                                                                                                                                                                                                                                                                                                                                                                                                                         |
|-------------------------------|---------------------------------------------------------------------------------------------------------------------------------------------------------------------------------------------------------------------------------------------------------------------------------------------------------------------------------------------------------------------------------------------------------------------------------------------------------------------------------------------------------------------------------------------------------------------------------------------------------------------------------------------------------------------------------------------------------------------------------------------------------------------------------------------------------------------------------------------------------------------------------------------------------------------------------------------------------------------------------------------------------------------------------------------------------------------------------------------------------------------------------------------------------------------------------------------------------------------------------------------------------------------------------------------------------------------------------------------------------------------------------------------------------------------------------------------------------------------------------------------------------------------------------------------------------------------------------------------------------------------------------------------------------------------------------------------------------------------------------------------------------------------------------------------------------------------------------------------------------------------------------------------------------------------------------------------------------------------------------------------------------------------------------------------------------------------------------------------------------------------------------------------------------------------------------------------------------------------------------------------------------------------------------------------------------------------------------------------------------|
| Journal:                      | <i>BMJ Open</i>                                                                                                                                                                                                                                                                                                                                                                                                                                                                                                                                                                                                                                                                                                                                                                                                                                                                                                                                                                                                                                                                                                                                                                                                                                                                                                                                                                                                                                                                                                                                                                                                                                                                                                                                                                                                                                                                                                                                                                                                                                                                                                                                                                                                                                                                                                                                         |
| Manuscript ID                 | bmjopen-2020-048042                                                                                                                                                                                                                                                                                                                                                                                                                                                                                                                                                                                                                                                                                                                                                                                                                                                                                                                                                                                                                                                                                                                                                                                                                                                                                                                                                                                                                                                                                                                                                                                                                                                                                                                                                                                                                                                                                                                                                                                                                                                                                                                                                                                                                                                                                                                                     |
| Article Type:                 | Protocol                                                                                                                                                                                                                                                                                                                                                                                                                                                                                                                                                                                                                                                                                                                                                                                                                                                                                                                                                                                                                                                                                                                                                                                                                                                                                                                                                                                                                                                                                                                                                                                                                                                                                                                                                                                                                                                                                                                                                                                                                                                                                                                                                                                                                                                                                                                                                |
| Date Submitted by the Author: | 22-Dec-2020                                                                                                                                                                                                                                                                                                                                                                                                                                                                                                                                                                                                                                                                                                                                                                                                                                                                                                                                                                                                                                                                                                                                                                                                                                                                                                                                                                                                                                                                                                                                                                                                                                                                                                                                                                                                                                                                                                                                                                                                                                                                                                                                                                                                                                                                                                                                             |
| Complete List of Authors:     | <p>Hayward, Andrew; University College London, Institute of Epidemiology and Health Care</p> <p>Fragaszy, Ellen; University College London, Centre for Public Health Data Science, Institute of Health Informatics; LSHTM, Department of Infectious Disease Epidemiology</p> <p>Kovar, Jana; University College London, Institute of Epidemiology and Health Care</p> <p>Nguyen, Vincent; University College London, Institute of Epidemiology and Health Care; University College London, Centre for Public Health Data Science, Institute of Health Informatics</p> <p>Beale, Sarah; University College London, Institute of Epidemiology and Health Care; University College London, Centre for Public Health Data Science, Institute of Health Informatics</p> <p>Byrne, Thomas; University College London, Centre for Public Health Data Science, Institute of Health Informatics</p> <p>Aryee, Anna; University College London, Centre for Public Health Data Science, Institute of Health Informatics</p> <p>Hardelid, Pia; University College London, Centre for Paediatric Epidemiology and Biostatistics, Institute of Child Health</p> <p>Wijlaars, Linda; UCL, Population, Policy and Practice; University College London, Primary Care and Population Health</p> <p>Fong, Wing Lam Erica; University College London, Centre for Public Health Data Science, Institute of Health Informatics</p> <p>Geismar, Cyril; University College London, Institute of Epidemiology and Health Care; University College London, Centre for Public Health Data Science, Institute of Health Informatics</p> <p>Patel, Parth; University College London, Centre for Public Health Data Science, Institute of Health Informatics</p> <p>Shrotri, Madhumita; University College London, Centre for Public Health Data Science, Institute of Health Informatics</p> <p>Navaratnam, Annalan M D; University College London, Institute of Epidemiology and Health Care; University College London, Centre for Public Health Data Science, Institute of Health Informatics</p> <p>Nastouli, Eleni ; Francis Crick Institute; University College London, Department of Population, Policy and Practice</p> <p>Spyer, Moira; Francis Crick Institute</p> <p>Killingley, Ben; University of Nottingham School of Medicine; University College London Hospital</p> |

|           |                                                                                                                                                                                                                                                                                                                                                                                                                                                                                                                                                                                                                                                                                                                                                                                                                                                                                                                                                                                                                                                           |
|-----------|-----------------------------------------------------------------------------------------------------------------------------------------------------------------------------------------------------------------------------------------------------------------------------------------------------------------------------------------------------------------------------------------------------------------------------------------------------------------------------------------------------------------------------------------------------------------------------------------------------------------------------------------------------------------------------------------------------------------------------------------------------------------------------------------------------------------------------------------------------------------------------------------------------------------------------------------------------------------------------------------------------------------------------------------------------------|
|           | Cox, Ingemar; University College London, Department of Computer Science<br>Lamos, Vasileios; University College London, Department of Computer Science<br>McKendry, Rachel; University College London, London Centre for Nanotechnology and Division of Medicine<br>Liu, Yunzhe; University College London, SpaceTimeLab, Civil, Environmental and Geomatic Engineering.<br>Cheng, Tao; University College London, SpaceTimeLab, Department of Civil, Environmental and Geomatic Engineering<br>Johnson, Anne; University College London, Institute for Global Health<br>Michie, Susan; University College London, Centre for Behaviour Change<br>Gibbs, Jo; University College London, Institute for Global Health<br>Gilson, Richard; University College London, Institute for Global Health<br>Rodger, Alison; University College London, Department of Infection and Population Health; Royal Free London NHS Foundation Trust<br>Aldridge, Robert; University College London, Centre for Public Health Data Science, Institute of Health Informatics |
| Keywords: | COVID-19, Public health < INFECTIOUS DISEASES, Epidemiology < INFECTIOUS DISEASES                                                                                                                                                                                                                                                                                                                                                                                                                                                                                                                                                                                                                                                                                                                                                                                                                                                                                                                                                                         |
|           |                                                                                                                                                                                                                                                                                                                                                                                                                                                                                                                                                                                                                                                                                                                                                                                                                                                                                                                                                                                                                                                           |

SCHOLARONE™  
Manuscripts

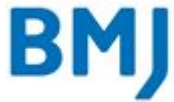

I, the Submitting Author has the right to grant and does grant on behalf of all authors of the Work (as defined in the below author licence), an exclusive licence and/or a non-exclusive licence for contributions from authors who are: i) UK Crown employees; ii) where BMJ has agreed a CC-BY licence shall apply, and/or iii) in accordance with the terms applicable for US Federal Government officers or employees acting as part of their official duties; on a worldwide, perpetual, irrevocable, royalty-free basis to BMJ Publishing Group Ltd ("BMJ") its licensees and where the relevant Journal is co-owned by BMJ to the co-owners of the Journal, to publish the Work in this journal and any other BMJ products and to exploit all rights, as set out in our [licence](#).

The Submitting Author accepts and understands that any supply made under these terms is made by BMJ to the Submitting Author unless you are acting as an employee on behalf of your employer or a postgraduate student of an affiliated institution which is paying any applicable article publishing charge ("APC") for Open Access articles. Where the Submitting Author wishes to make the Work available on an Open Access basis (and intends to pay the relevant APC), the terms of reuse of such Open Access shall be governed by a Creative Commons licence – details of these licences and which [Creative Commons](#) licence will apply to this Work are set out in our licence referred to above.

Other than as permitted in any relevant BMJ Author's Self Archiving Policies, I confirm this Work has not been accepted for publication elsewhere, is not being considered for publication elsewhere and does not duplicate material already published. I confirm all authors consent to publication of this Work and authorise the granting of this licence.

# Risk factors, symptom reporting, healthcare-seeking behaviour and adherence to public health guidance: protocol for Virus Watch, a prospective community cohort study

Andrew Hayward<sup>1</sup>, Ellen Fragaszy<sup>2,3</sup>, Jana Kovar<sup>1</sup>, Vincent Nguyen<sup>1,2</sup>, Sarah Beale<sup>1,2</sup>, Thomas Byrne<sup>2</sup>, Anna Aryee<sup>2</sup>, Pia Hardelid<sup>4</sup>, Linda Wijlaars<sup>4</sup>, Wing Lam Erica Fong<sup>2</sup>, Cyril Geismar<sup>1,2</sup>, Parth Patel<sup>2</sup>, Madhumita Shrotri<sup>2</sup>, Annalan M D Navaratnam<sup>1,2</sup>, Eleni Nastouli<sup>5,6</sup>, Moira Spyer<sup>6</sup>, Ben Killingley<sup>7,8</sup>, Ingemar Cox<sup>9</sup>, Vasileios Lamos<sup>9</sup>, Rachel A McKendry<sup>10</sup>, Yunzhe Liu<sup>11</sup>, Tao Cheng<sup>11</sup>, Anne M Johnson<sup>13</sup>, Susan Michie<sup>12</sup>, Jo Gibbs<sup>13</sup>, Richard Gilson<sup>13</sup>, Alison Rodger<sup>13,14</sup>, Robert W Aldridge<sup>2</sup>

## Affiliations

1 Institute of Epidemiology and Health Care, University College London, London, UK

2 Centre for Public Health Data Science, Institute of Health Informatics, University College London, UK.

3 Department of Infectious Disease Epidemiology, London School of Hygiene and Tropical Medicine, Keppel Street, London, UK.

4 UCL Great Ormond Street Institute of Child Health, London, UK.

5 Department of Population, Policy and Practice, UCL Great Ormond Street Institute of Child Health, London, UK.

6 Francis Crick Institute, London, UK.

7 Health Protection and Influenza Research Group, Division of Epidemiology and Public Health, University of Nottingham School of Medicine, Nottingham, United Kingdom.

8 University College London Hospital, London, United Kingdom.

9 Department of Computer Science, University College London, London, UK.

10 London Centre for Nanotechnology and Division of Medicine, London, UCL.

11 SpaceTimeLab, Department of Civil, Environmental and Geomatic Engineering, University College London, London, UK.

12 Centre for Behaviour Change, University College London, London, UK.

13 Institute for Global Health, University College London, London, UK.

14 Royal Free London NHS Foundation Trust, London, UK.

**Corresponding Author:**

Andrew Hayward, Institute of Epidemiology and Health Care, University College London,  
London, WC1E 7HB, UK

## Emails:

Andrew Hayward [a.hayward@ucl.ac.uk](mailto:a.hayward@ucl.ac.uk), Ellen Fragaszy [ellen.fragaszy@ucl.ac.uk](mailto:ellen.fragaszy@ucl.ac.uk), Jana Kovar [j.kovar@ucl.ac.uk](mailto:j.kovar@ucl.ac.uk), Vincent Nguyen [vincent.nguyen.11@ucl.ac.uk](mailto:vincent.nguyen.11@ucl.ac.uk), Sarah Beale [sarah.beale.19@ucl.ac.uk](mailto:sarah.beale.19@ucl.ac.uk), Thomas Byrne [t.byrne@ucl.ac.uk](mailto:t.byrne@ucl.ac.uk), Anna Aryee [a.aryee@ucl.ac.uk](mailto:a.aryee@ucl.ac.uk), Pia Hardelid [p.hardelid@ucl.ac.uk](mailto:p.hardelid@ucl.ac.uk), Linda Wijlaars [linda.wijlaars@ucl.ac.uk](mailto:linda.wijlaars@ucl.ac.uk), Wing Lam Erica Fong [erica.fong.16@ucl.ac.uk](mailto:erica.fong.16@ucl.ac.uk), Cyril Geismar [cyril.geismar.16@ucl.ac.uk](mailto:cyril.geismar.16@ucl.ac.uk), Parth Patel [parth.patel@ucl.ac.uk](mailto:parth.patel@ucl.ac.uk), Madhumita Shrotri [madhumita.shrotri.09@ucl.ac.uk](mailto:madhumita.shrotri.09@ucl.ac.uk), Annalan M D Navaratnam [a.navaratnam@ucl.ac.uk](mailto:a.navaratnam@ucl.ac.uk), Eleni Nastouli [e.nastouli@ucl.ac.uk](mailto:e.nastouli@ucl.ac.uk), Moira Spyer [moira.spyer@ucl.ac.uk](mailto:moira.spyer@ucl.ac.uk), Ben Killingley [ben.killingley@nhs.net](mailto:ben.killingley@nhs.net), Ingemar Cox [i.cox@ucl.ac.uk](mailto:i.cox@ucl.ac.uk), Vasileios Lampos [v.lampos@ucl.ac.uk](mailto:v.lampos@ucl.ac.uk), Rachel A McKendry [r.a.mckendry@ucl.ac.uk](mailto:r.a.mckendry@ucl.ac.uk), Tao Cheng [tao.cheng@ucl.ac.uk](mailto:tao.cheng@ucl.ac.uk), Anne M Johnson [anne.johnson@ucl.ac.uk](mailto:anne.johnson@ucl.ac.uk), Susan Michie [s.michie@ucl.ac.uk](mailto:s.michie@ucl.ac.uk), Jo Gibbs [jo.gibbs@ucl.ac.uk](mailto:jo.gibbs@ucl.ac.uk), Richard Gilson [r.gilson@ucl.ac.uk](mailto:r.gilson@ucl.ac.uk), Alison Rodger [alison.rodger@ucl.ac.uk](mailto:alison.rodger@ucl.ac.uk), Robert W Aldridge [r.aldridge@ucl.ac.uk](mailto:r.aldridge@ucl.ac.uk)

Word count: 3975

## Abstract

**Introduction:** The Coronavirus (COVID-19) Pandemic has caused significant global mortality and impacted lives around the world. Virus Watch aims to provide evidence on which public health approaches are most likely to be effective in reducing transmission and impact of the virus, and will investigate community incidence, symptom profiles, and transmission of COVID-19 in relation to population movement and behaviours.

**Methods and analysis:** Virus Watch is a household community cohort study of acute respiratory infections in England & Wales and will run from June 2020 to Sept 2021. The study aims to recruit 42,500 people, including 12,500 from minority ethnic backgrounds, for an online survey cohort. Nested within this larger study will be a sub-cohort of 10,000 individuals, including 3,000 people from minority ethnic backgrounds. This cohort of 10,000 people will have full blood serology taken between October 2020 and January 2021 and repeat serology between May 2021 and August 2021. Participants will also post self-administered nasal swabs for PCR assays of SARS-CoV-2 and will follow one of three different PCR testing schedules based upon symptoms.

**Ethics and dissemination:** This study has been approved by the Hampstead NHS Health Research Authority Ethics Committee. Ethics approval number – 20/HRA/2320. We are monitoring participant queries and using these to refine methodology where necessary, and are providing summaries of our preliminary findings to inform public health action by working through our partnerships with our study advisory group, Public Health England, NHS and Government Scientific Advisory panels.

Keywords: COVID-19; UK; cohort study; epidemiology

## Strengths and limitations of this study

- 1  
2  
3 1. Virus Watch is a large national household community cohort study of the  
4 occurrence and risk factors for COVID-19 infection that aims to recruit 42,500  
5 people, including 12,500 from minority ethnic backgrounds.  
6  
7
- 8 2. Virus Watch is designed to estimate incidence of PCR confirmed COVID-19 in  
9 those with respiratory and non-respiratory presentations and the incidence of  
10 hospitalisation among PCR confirmed COVID-19 cases.  
11  
12
- 13 3. Virus Watch will measure effectiveness and impact of recommended COVID-19  
14 control measures including testing, isolation, social distancing, respiratory and  
15 hand hygiene measures on risk of respiratory infection.  
16  
17
- 18 4. Only households with a lead householder able to speak English were able to take  
19 part in the study up until December 2020. From Jan 2021, translations of the  
20 online survey will be implemented for individuals recruited from this point  
21 onwards.  
22  
23
- 24 5. Only households of up to six people were eligible for inclusion.  
25  
26  
27  
28  
29  
30  
31

## 32 **Introduction**

33  
34  
35 The Coronavirus disease 2019 (COVID-19) pandemic has caused millions of deaths  
36 and impacted lives around the world with the closure of schools, workplaces, and  
37 limitations on freedom of movement. Vaccines and effective scalable treatments for  
38 COVID-19 are being discovered, but whilst these are still being approved and further  
39 refined, we will need to rely on other measures to stop the spread of COVID-19. We will  
40 also require studies to examine their effectiveness as they are implemented across  
41 England and Wales.  
42  
43

44  
45  
46  
47 COVID-19 transmission in the UK has started to increase since the end of August 2020.  
48 Governments, including those of the UK devolved nations, are adopting a wide range of  
49 control measures to limit the spread of infection. These include isolation of people with  
50 COVID-19 symptoms and their household contacts, widespread testing and contact  
51 tracing, digital contact tracing using mobile phone apps, broad social distancing  
52 measures, and local control measures. Environmental cleaning, hand hygiene and face  
53 mask use are also advised.  
54  
55  
56  
57  
58



1  
2  
3 Much of our current knowledge of COVID-19 comes from observations at the more  
4 severe end of the disease spectrum, in hospitalised patients and individuals who die  
5 having tested positive for the disease.[1–3] Although large-scale studies of prevalence  
6 of PCR positive infection and seroprevalence have been established, there is currently  
7 limited information on symptom profiles through the course of illness in non hospitalised  
8 populations, children, social and behavioural risk factors for infection, strength and  
9 duration of immunity, household and community transmission risk, and population  
10 behaviours during periods of wellness and illness (including social contacts, use of  
11 public spaces, testing behaviours, isolation, mask use, hand and respiratory hygiene).  
12 This information can only be gathered accurately through prospective large-scale  
13 community cohorts. Our experience of the MRC/Wellcome Flu Watch study[4,5] and  
14 ESRC Bug Watch[6] study has allowed us to rapidly establish a national household  
15 cohort study of 42,500 individuals.

16  
17  
18  
19  
20  
21  
22  
23  
24  
25  
26  
27  
28  
29  
30  
31  
32  
33  
34  
35  
36  
37  
38  
39  
40  
41  
42  
43  
44  
45  
46  
47  
48  
49  
50  
51  
52  
53  
54  
55  
56  
57  
58  
59  
60

Virus Watch aims to provide evidence on which public health approaches are most likely to be effective in reducing the spread and impact of the virus and will investigate community incidence, symptom profiles, and transmission of COVID-19 in relation to population movement and behaviour.

## Methods

### Study design and setting

Virus Watch is a household community cohort study of acute respiratory infections in England and Wales covering the second and potential subsequent waves of the COVID-19 pandemic. The study period will be 1st June 2020 to 30th Sept 2021. The study aims to recruit 42,500 individuals, including 12,500 from minority ethnic backgrounds for an online survey cohort (study 1). Nested within this larger study will be a sub-cohort of 10,000 individuals (study 2), including 3,000 people from minority ethnic backgrounds. Participants in this laboratory sub-cohort will be selected based on their geographical distance away from one of our blood taking clinics; either a 10km radius from a clinic in cities, or a 20km radius in rural areas. Participants will be balanced to be representative of the UK population for sex, age and region. Figure 1 provides an overview of the study design.

Figure 1. Overview of cohort recruitment and data collection for the Virus Watch household community cohort study.

Households self-select into the study if they live in England and Wales and all members of a household need to consent to take part in the study to meet our inclusion criteria. Households need to have an internet connection on a phone, tablet or computer, email, and, up until the end of November 2020, at least one adult household member that can read English. From December 2020 onwards, online surveys will be translated into multiple languages. A household is defined as one or more people (not necessarily related) whose usual residence (4 days/week or more) is at the same address. These householders share cooking facilities, a living room or sitting room or dining area.

## Primary outcomes

### *Study 1: Online Survey Cohort*

1. Incidence of respiratory infection symptoms, including COVID-19 disease case definitions.
2. Effectiveness and impact of recommended COVID-19 control measures including testing, isolation, social distancing, respiratory and hand hygiene measures on risk of respiratory infection.
3. Frequency of adherence with public-health recommendations for these control measures.
4. Proportion of community infections that result in hospital admissions and death.

### *Study 2: Laboratory testing sub-cohort*

1. Incidence of PCR confirmed COVID-19.
2. Incidence of PCR confirmed COVID-19 in those with non-respiratory presentations.
3. Incidence of hospitalisation among PCR confirmed COVID-19 cases.
4. Proportion of individuals with SARS-CoV-2 antibodies acquired through natural infection to pandemic coronavirus.
5. Proportion of individuals with cross-reacting antibodies to seasonal coronaviruses acquiring (or not) SARS-CoV-2.
6. Household secondary attack rates.
7. Protective effect of antibodies on infection and re-infection as well as the severity and spectrum of presentation.

## Recruitment

We will use the Royal Mail Post Office Address File to generate a list of residential address lists from which households can be sampled and sent Virus Watch recruitment postcards to. The proposed initial sample design is a single-stage stratified probability sample where implicit stratification is employed to benefit from the precision gains that

1  
2  
3 stratified sampling can bring. Within each region, residential addresses are sorted by (a)  
4 quintiles of Index of Multiple Deprivation 2019 (IMD), (b) within quintiles by Local  
5 Authorities, (c) postcodes and (d) address. We will perform this in the 9 Government  
6 Office Regions of England as well as Wales (10 study regions in total).  
7  
8  
9

10  
11 We will assess recruitment rates and the representativeness of this initial sample  
12 following the mail out of 50,000 postcards. If recruitment is lower than expected or  
13 under-representative of the national population, we will redesign our recruitment  
14 campaign to include a range of methods in order to build the cohort. This mixed  
15 recruitment strategy will be flexible and use a variety of methods including social media,  
16 study leaflet drops, text messaging, personalised letters and incentives. Social media  
17 adverts will be used to inform individuals about the study and direct them to our website  
18 <http://ucl-virus-watch.net/> where they can read the participant information sheets and  
19 consent to taking part. Digital invitations will also be created for sharing via WhatsApp.  
20 Text messages and postal letters inviting patients from their General Practitioner clinics  
21 will be organised via Local Clinical Research Networks.[7] We will also work with trusted  
22 community partners and religious organisations to promote recruitment into the study.  
23  
24  
25  
26  
27  
28  
29  
30  
31  
32  
33

34 In order for a household to be enrolled, they will require an internet connection (Wi-Fi,  
35 fixed or on a mobile phone), email address, and all household members must agree to  
36 take part. Households will nominate a lead householder who will submit study  
37 questionnaires. Up until December 2020, the lead householder will need to be able to  
38 read English to support other household members in survey completion. From  
39 December 2020 onwards, online surveys will be translated into multiple languages and  
40 this will no longer be an inclusion criteria. A household is defined as one or more people  
41 (not necessarily related) whose usual residence (4 days/week or more) is at the same  
42 address. These householders share cooking facilities, and may share a living room or  
43 sitting room or dining area if available. Households with more than six members will not  
44 be eligible for the study - this criteria was set due to limitations of the REDCap survey  
45 infrastructure which did not function correctly when attempting to work with household  
46 sizes of greater than six during our pilot testing of the survey.  
47  
48  
49  
50  
51  
52  
53  
54  
55  
56  
57  
58  
59  
60

1  
2  
3  
4  
5  
6  
7  
8  
9  
10  
11  
12  
13  
14  
15  
16  
17  
18  
19  
20  
21  
22  
23  
24  
25  
26  
27  
28  
29  
30  
31  
32  
33  
34  
35  
36  
37  
38  
39  
40  
41  
42  
43  
44  
45  
46  
47  
48  
49  
50  
51  
52  
53  
54  
55  
56  
57  
58  
59  
60

Virus Watch is powered for our primary aims in study 2 and the estimation of population-level symptomatic COVID-19 attack rate over time. Based on an estimated clinical attack rate of 30% of whom 20% need hospitalisation, and 0.5% die we expect the following number of outcome events in our cohort of 10,000 individuals in study 2: 3000 COVID-19 illnesses, 600 hospitalised cases, and 15 deaths. At one month into the outbreak we would be able to detect a 1.7-fold greater risk of disease in a population subgroup that constitutes 1/5 of the population, and by 2 months the detectable relative risk would be only 1.2. At one month we could detect a 4% hospital admission rate amongst cases with 95% CI of 0.5-6.8, and by 2 months the confidence intervals would narrow to 3.1-4.1. We have used estimates of the expected number of events over time to provide an indication of the fact that the cohort is sufficiently large to provide valuable information through the course of the pandemic. Sample size calculations have been informed by a realistic assessment of what we can achieve based on our previous experience[4,6]. For the serology cohort of 3000 people from minority ethnic backgrounds we assume a modest design effect (DE) due to household and geographical clustering, and 500 participants for six different minority ethnic backgrounds to enable the measurement of a cumulative incidence of 10% with 95% confidence intervals of 3% by each minority ethnic group.

## Participant materials and incentives

Participant information sheets will be held on our study website. In order to participate, the whole household must take part. Each adult participant will need to read through study information, and provide online informed consent for themselves and any children they are legally responsible for. Children aged 6-9 and 10-15 years respectively will also be asked to read through age specific study participant information sheets and provide online informed assent. For children aged 5 and under, parents/guardians will consent on their behalf. Copies of translated consent questions will be provided where possible for those unable to read English. Informed consent data will be securely stored in UCL's Data Safe Haven which has been certified to the ISO27001 information security standard and conforms to NHS Digital's Data Security and Protection Toolkit.

1  
2  
3 Local study teams will re-consent participants face to face, prior to undertaking blood  
4 sampling, and adult participants in study 2 will be offered a £10 voucher to reimburse  
5 travel costs. We will seek ethical approval for the use of recruitment incentives if levels  
6 of recruitment are lower than expected.  
7  
8  
9

## 10 **Data collection and follow-up**

### 11 *Study 1: Online Survey Cohort*

12  
13  
14  
15  
16  
17  
18 The online survey cohort will collect data and follow up participants through six different  
19 sources. Survey data will be collected using Research Electronic Data Capture  
20 (REDCap) electronic data capture tools hosted on the UCL Data Safe Haven.[8]  
21 REDCap is a secure, web-based application for research studies. The UCL Data Safe  
22 Haven provides a technical solution for storing, handling and analysing identifiable data.  
23 It has been certified to the ISO27001 information security standard and conforms to  
24 NHS Digital's Data Security and Protection Toolkit .  
25  
26  
27  
28  
29  
30

31  
32 1) Baseline Survey. The  
33 Lead Householder will be asked to complete an online baseline survey for each  
34 member of their household. Information collected includes: demographics, occupation,  
35 income, ethnicity, country of birth, year of entry to UK, chronic medical conditions,  
36 medications, pregnancy status, vaccines, mode of transport to work, any previous  
37 contact with someone with COVID-19, previous symptoms of COVID-19-like illness and  
38 infection-prevention behaviours such as social distancing and hand hygiene.  
39  
40  
41  
42  
43  
44

45  
46 2) Illness Surveys.  
47 Participants will be followed-up weekly via an email with a link to an illness survey. This  
48 is a weekly survey of the presence or absence of symptoms that could indicate COVID-  
49 19 disease including respiratory, general infection symptoms or gastrointestinal  
50 symptoms. During illness, prospective daily symptom recording, quality of life, health  
51 seeking behaviour (NHS 111, GP in person, GP by phone, A&E, Pharmacy, Hospital),  
52 treatments, and NHS investigations will be recorded. This survey will also include any  
53 respiratory and hygiene measures, self-isolation, activities and social contact, travel and  
54  
55  
56  
57  
58  
59  
60

1  
2  
3 face mask use. The survey includes questions to the household on activities undertaken  
4 in the week prior to symptom onset. The weekly survey will also be used to capture test  
5 results received from outside the study and requests to self isolate eg. via the UK Test-  
6 Trace-Isolate system.  
7  
8  
9

10  
11  
12 3) Monthly Surveys. A  
13 number of questions will be asked every month. The monthly surveys also provide  
14 flexibility to ask additional questions (eg. behavioural changes) to reflect any new  
15 government directives on social distancing, testing, contact tracing, and vaccine  
16 delivery. Core questions will also allow us to follow up reasons for any non-response in  
17 a given month- (e.g. because of illness, hospitalisation or holiday). We will also ask  
18 about online health information seeking, social distancing, including recent (week  
19 before) contacts, activities, places visited and hand & respiratory hygiene. We will ask  
20 about finances, employment, and mental health to see how the COVID-19 response is  
21 affecting participants' wellbeing and ability to work. We will ask about access to  
22 healthcare for non-COVID-19 health problems to explore the indirect health impacts of  
23 the pandemic. We will ask about any COVID-19 PCR or antibody test results performed  
24 outside the study and not already reported through baseline surveys. We will ask about  
25 influenza vaccine uptake and COVID-19 vaccination intentions and uptake.  
26  
27  
28  
29  
30  
31  
32  
33  
34  
35  
36  
37

38 4) Data Linkage. NHS  
39 Digital will undertake quarterly data linkage between cohort 1 and Hospital Episode  
40 Statistics (HES), which includes admitted patient and critical care episodes, outpatient  
41 department bookings, and emergency care contacts. This linkage will also include  
42 Office for National Statistics mortality data and virology testing data routinely collected  
43 by Public Health England, Public Health Wales, and the Department of Health and  
44 Social Care through 'Pillar 1' (testing in hospital patients and health and care workers)  
45 and 'Pillar 2' (community testing). These data sources will be linked to the cohort using  
46 name, NHS numbers, dates of birth and postal address. Identifying variables will be  
47 removed before the linked data are transferred back to UCL for analysis. These data  
48 linkages will continue for up to 5 years after the end of the study as we anticipate  
49 COVID-19 will become a recurring winter infection and we wish to understand its impact  
50  
51  
52  
53  
54  
55  
56  
57  
58  
59  
60

1  
2  
3 on health services in subsequent years. These linkage studies will identify any  
4 participants that have been admitted to hospital or died due to causes that could be  
5 directly or indirectly linked to the COVID-19 pandemic. Indirect causes include those  
6 related to limitations in healthcare access during the pandemic. Reductions in the use  
7 of routine health services will also be monitored via linkage to HES data.  
8  
9  
10  
11  
12

13 5) Geo-location Tracking.

14 All adult participants will be asked about optional consent to use a secure geo-location  
15 tracking app (Tracker for ArcGIS) installed on their mobile phone for the duration of the  
16 study.  
17  
18  
19  
20  
21

22 6) Home antibody finger prick tests. 5000 members of the online cohort who are not  
23 part of the Laboratory testing sub-cohort (including 2500 minority ethnic and 2500 White  
24 British people) will be offered home finger prick antibody testing kits as soon as  
25 available after the first wave of the pandemic and after the second wave of the  
26 pandemic.  
27  
28  
29  
30  
31

32 *Study 2: Laboratory testing sub-cohort*

33  
34  
35  
36 All participants agreeing to take part in the main cohort (study 1) will be asked to  
37 provide consent to be contacted and invited to participate in one of the three laboratory  
38 testing sub-groups. This will enable a cohort of 10,000 individuals selected from the  
39 main cohort of 42,500 individuals to be maximally representative of the population of  
40 England and Wales. All participants taking part in study 2 will be asked to use the  
41 national test, trace and isolation system in addition to providing samples as part of Virus  
42 Watch.  
43  
44  
45  
46  
47  
48  
49

50 Study 2 will consist of three groups that will follow different schedules of antibody testing  
51 and nasal/throat swabs for PCR testing.  
52  
53  
54

55 Group 1 ( $n=7000$ ):  
56  
57  
58  
59  
60



1  
2  
3 With data from this group we aim to identify infection in those with a wide range of  
4 respiratory symptoms. Participants will be asked to submit a nose/throat swab if they  
5 experience two consecutive days of: fever (>37.8), feeling feverish, or new persistent  
6 cough, or loss or altered sense of smell or taste (COVID-19 suspected case definition),  
7 or shortness of breath, or ear pain or change in hearing, or sore throat, or sneezing, or  
8 blocked nose, or runny nose, or wheeze or sinus pain or congestion (other respiratory  
9 manifestations).

10  
11  
12  
13  
14  
15  
16  
17 Group 2 ( $n=1000$ ):

18 This group aims to identify the importance of non-respiratory presentations. Participants  
19 will be asked to submit a self-taken nasal/throat swab for PCR identification of COVID-  
20 19 and other respiratory viruses if:  
21

- 22 ● Either - two consecutive days of respiratory symptoms (e.g. cough, runny nose,  
23 sneezing, shortness of breath, sore throat, blocked nose, sinus pain or  
24 congestion, ear pain or change in hearing, wheezing, loss of or altered sense of  
25 taste or sense of smell).
  - 26 ● OR – two consecutive days of gastrointestinal symptoms (e.g. diarrhoea/loose  
27 stools, abdominal pain, nausea or vomiting, loss of appetite).
  - 28 ● OR - two consecutive days of general infection symptoms (e.g. feeling feverish,  
29 having a high temperature, feelings of severe unexplained tiredness, generalised  
30 muscle or joint aches)
- 31  
32  
33  
34  
35  
36  
37  
38  
39  
40

41 Group 3 ( $n = 2000$ ):

42 This group aims to identify the extent of household transmission. Participants will be  
43 asked to submit a nose/throat swab if they experience two consecutive days of cough or  
44 fever or loss of sense of taste or smell. Household contacts of the index case will also  
45 be asked to submit a swab on the same day whether or not they have symptoms.  
46  
47  
48  
49

50  
51 If any of the swabs indicate SARS-COV-2 infection, all household members will be  
52 asked to repeat the swab on Day 7 and Day 14. If there are no new SARS-COV-2  
53 cases in the household arising from swabs on Day 7 and 14 (assumed secondary  
54 cases) then all household members will be asked to undertake a home finger prick  
55  
56  
57  
58  
59

1  
2  
3 antibody test on Day 21. If there is one or more secondary cases in the household then  
4 the entire household will be asked to take an additional swab on day 21 and then  
5 undertake the fingerprick antibody tests on Day 28.  
6  
7  
8  
9

### 10 *End of follow-up*

11  
12  
13 Online participant follow-up will end in May 2021 although depending on the  
14 progression of COVID-19 we may ask participants to continue in the study for longer.  
15 Participants will be sent an exit survey via email which will also ask participants for  
16 permission to be contacted for involvement in future related research. Participants will  
17 be contacted to arrange a second blood sample collection from May 2021. Follow-up  
18 through data linkage with Hospital Episode Statistics and Mortality data will continue for  
19 5 years after the end of the study.  
20  
21  
22  
23  
24  
25

### 26 **Laboratory testing**

#### 27 *Antibody testing*

28  
29  
30 Study 2 will be using two different types of antibody tests. First, full blood serology will  
31 be taken between October 2020 and January 2021. We will use experienced health  
32 care professionals, including research nurses from the NIHR Clinical Research  
33 Networks.[9] Depending on local circumstances, visits to participants' homes to take  
34 blood may also be arranged. Children aged 15 years or less can opt out of having their  
35 blood taken but will be offered a finger prick antibody test conducted by a healthcare  
36 worker instead. All participants from laboratory group 3 will additionally be offered a  
37 fingerprick antibody test at the same time as blood taking. From May 2021 until  
38 September 2021, we will invite all participants back for full blood tests or, for children  
39 who do not wish to have a full bleed, healthcare worker-delivered finger prick based  
40 antibody tests.  
41  
42  
43  
44  
45  
46  
47  
48  
49  
50

51  
52 Families of children who have not been able to attend for a blood test, or for a  
53 healthcare worker-delivered finger prick antibody test, will be provided with postal kits to  
54 perform these at home. We also plan to use finger prick antibody testing where local  
55 clinics are no longer able to undertake full blood tests due to COVID-19 travel  
56  
57  
58  
59  
60

1  
2  
3 restrictions. Extremely clinically vulnerable participants will be sent home fingerprick  
4 tests instead of being asked to provide a serological sample.  
5  
6

### 7 8 *Virus detection* 9

10 Participants will post swab samples for PCR assays of COVID-19, and subsequent  
11 testing for influenza virus, seasonal coronavirus, rhinovirus and respiratory syncytial  
12 virus (RSV). When COVID-19 is identified we will also undertake whole genome  
13 sequencing of the virus. Samples for COVID-19 diagnostics will be handled and  
14 processed according to the NHS and UCL guidance on sample handling during the  
15 COVID-19 pandemic.  
16  
17

18 COVID-19 PCR and serology results will be returned to participants via text and email  
19 message systems. These messages will include links to official support, information and  
20 advice from NHS and PHE as well as advice on how to interpret results based on  
21 current evidence. In laboratory group 3, where positive test results will trigger further  
22 testing of the household, the results email will also include details explaining the  
23 additional testing requests.  
24  
25  
26  
27  
28  
29  
30  
31  
32  
33

### 34 **Statistical analysis** 35 36 37 38

39 Our primary analyses during the winter 2020/21 will focus on estimating age-specific  
40 weekly rates of symptoms and PCR-confirmed COVID-19 illness and hospitalisation.  
41 For this analysis we will use appropriate regression models that account for clustering  
42 by household and we will explore the use of stratification or weighting of the sample by  
43 age and region as necessary to give nationally representative estimates. Weekly rates  
44 will be expressed per 100,000 person-weeks for ease of comparison with national  
45 surveillance data.  
46  
47  
48  
49  
50  
51

52 We will examine the proportion of the population infected during the first wave (e.g. Feb  
53 2020 to Sept 2020) and second and potentially future pandemics waves. We will  
54 estimate the percentage of the population infected by calculating age and wave-specific  
55 rates of serological infection and PCR-confirmed disease per 100 person-seasons. A  
56  
57  
58  
59  
60

1  
2  
3 person-season will be defined by the epidemic curve in the cohort and therefore rates  
4 will account for differential follow-up time during each epidemic peak. In these analyses  
5 we will examine risk factors for infection, disease, disease severity and disease  
6 transmission.  
7  
8  
9

10  
11 We will estimate the proportion of serologically confirmed SARS-CoV-2 infections  
12 leading to symptomatic disease. First, we will calculate age-adjusted attributable rates  
13 of illness due to infection (subtracting rates of respiratory illness in non seroconverters  
14 from those in seroconverters). Second, we will measure the proportion of  
15 seroconverters with PCR-confirmed COVID-19. Analyses plans will be developed prior  
16 to conducting all analyses.  
17  
18  
19  
20  
21  
22

23  
24 Whilst the study is being conducted, we will produce early, preliminary results for  
25 participants, the general public and policy makers in order to inform the public health  
26 response to the pandemic. These analyses will be reactive to the epidemiological  
27 circumstances and are therefore not defined in this protocol.  
28  
29  
30

### 31 32 *Modelling*

33 We will build on our experience of working with PHE, Google, and Microsoft to use  
34 anonymous national or subnational aggregate web search engine data[10,11] to monitor  
35 the spreading of the disease. We will use our study data as ground-truth to train real-  
36 time disease prevalence estimation algorithms. We will annotate GPS tracking data into  
37 standard categories including time at work and home, social venues, supermarkets,  
38 hospitals, GPs, and transport mode for incorporation in classical epidemiological  
39 analyses. Integrating the linked survey data, we will develop multi-level spatio-temporal  
40 transmission models predicting the impact of various social distancing strategies.  
41  
42  
43  
44  
45  
46  
47  
48  
49  
50  
51  
52  
53  
54  
55  
56  
57  
58  
59  
60

## Patient and public involvement

Due to the urgent nature of this study, we did not involve participants in its original design. We have previously conducted PPI to support similar community cohort studies of acute infections using similar methodologies. We have engaged the Young Persons' Advisory Group for research at Great Ormond Street Hospital to provide feedback on our Children's Participant Information Sheets. We will provide opportunities for survey participants to comment on survey methodology at the first monthly survey and consider revisions based on this. At the baseline survey, and each month, we will ask participants what questions are important to them (in relation to COVID-19 epidemiology and response), and what research questions they would like us to answer. We are also monitoring participant queries through our study email address and using these to refine methodology where necessary. We have worked with the Race Equality Foundation and Doctors of the World in advising on the inclusion of people from minority ethnic backgrounds in Virus Watch and have set up an advisory group to inform the ongoing design and dissemination of health equity aspects of Virus Watch. This advisory group (consisting of lay members of the public, community leaders, charities and policy organisation) will guide our health equity analyses and steer us on its implications for people, communities and policy.

## Data sharing and access

We aim to share aggregate data from this project on our website and via a "Findings so far" section on our website - <https://ucl-virus-watch.net/>. We will also be sharing individual record level data with personal identifiers removed on a research data sharing service such as the UK Data Archive. In sharing the data we will work within the principles set out in the UKRI Guidance on best practice in the management of research data. <https://www.ukri.org/files/legacy/documents/rcukcommonprinciplesondatapolicy-pdf/>. Access to use of the data whilst research is being conducted will be managed by the Chief Investigators (ACH and RWA) in accordance with the principles set out in the UKRI guidance on best practice in the management of research data. It is the intention that the data arising from this research will initially be collected, cleaned and validated

1  
2  
3 by the UCL research team and once this has been completed will be shared for wider  
4 use. We aim to make subsets of the data more rapidly available both on our study  
5 website and via the public facing dashboard during the ongoing phase of data  
6 collection. In line with Principle 5 of the UKRI guidance on best practice in the  
7 management of research data, we plan to release data in batches as they become  
8 available or as updated results are published. Individual record data linked using NHS  
9 Digital will not be shared, only aggregated results. HES and mortality data may be  
10 obtained from a third party and are not publicly available. These data are owned by a  
11 third party and can be accessed by researchers applying to the Health and Social Care  
12 Information Centre for England. We will put analysis code on publicly available  
13 repositories to enable their reuse.  
14  
15  
16  
17  
18  
19  
20  
21  
22  
23  
24  
25

## 26 **Ethics**

27  
28  
29 This is a national study that has been approved by the Hampstead NHS Health  
30 Research Authority Ethics Committee. Ethics approval number – 20/HRA/2320. The  
31 study is compliant with the requirements of General Data Protection Regulation  
32 (2016/679) and the Data Protection Act (2018). All investigators and study site staff will  
33 comply with the requirements of the General Data Protection Regulation (2016/679)  
34 with regards to the collection, storage, processing and disclosure of personal  
35 information, and will uphold the Act's core principles.  
36  
37  
38  
39  
40  
41  
42  
43

## 44 **Author Contributions**

45  
46 Roles: Conceptualization (AH, EF, JK, PH, EN, BK, IC, VL, RAMcK, TC, AMJ, SM, JG,  
47 RG, AR, RWA) Investigation, Methodology (All authors), Project Administration (AH, EF,  
48 JK, VN, SB, TB, AA, PH, LW, WLEF, CG, PP, MSh, AMDN, EN, MSp, RWA) , Writing –  
49 Original Draft Preparation (All Authors), Software (VN, TB, SB, RWA), Resources (AH,  
50 EF, JK, PH, EN, BK, IC, VL, RAMcK, TC, AMJ, SM, JG, RG, AR, RWA), Writing –  
51 Review & Editing (All Authors).  
52  
53  
54  
55  
56  
57  
58  
59  
60

## Funding

The research costs for the study have been supported by the MRC Grant Ref: MC\_PC 19070 awarded to UCL on 30 March 2020 and MRC Grant Ref: MR/V028375/1 awarded on 17 August 2020. The study also received \$15,000 of advertising credit to support a pilot social media recruitment campaign on 18th August 2020.

**Competing interests:** ACH serves on the UK New and Emerging Respiratory Virus Threats Advisory Group. AMJ was a Governor of Wellcome Trust from 2011-18 and is Chair of the Committee for Strategic Coordination for Health of the Public Research.

## References

- 1 Official UK Coronavirus Dashboard. <https://coronavirus.data.gov.uk/> (accessed 30 Nov 2020).
- 2 Statistics. Statistics » COVID-19 Daily Deaths. <https://www.england.nhs.uk/statistics/statistical-work-areas/covid-19-daily-deaths/> (accessed 30 Nov 2020).
- 3 Coronavirus (COVID-19). <https://www.ons.gov.uk/peoplepopulationandcommunity/healthandsocialcare/conditionsanddiseases> (accessed 30 Nov 2020).
- 4 Fragaszy EB, Warren-Gash C, Wang L, *et al*. Cohort Profile: The Flu Watch Study. *Int J Epidemiol* 2017;**46**:e18. doi:10.1093/ije/dyv370
- 5 Hayward AC, Fragaszy EB, Bermingham A, *et al*. Comparative community burden and severity of seasonal and pandemic influenza: results of the Flu Watch cohort study. *Lancet Respir Med* 2014;**2**:445–54. doi:10.1016/S2213-2600(14)70034-7
- 6 Smith CM, Conolly A, Fuller C, *et al*. Symptom reporting, healthcare-seeking behaviour and antibiotic use for common infections: protocol for Bug Watch, a prospective community cohort study. *BMJ Open* 2019;**9**:e028676. doi:10.1136/bmjopen-2018-028676
- 7 Clinical Research Network. <https://www.nihr.ac.uk/explore-nihr/support/clinical-research-network.htm> (accessed 30 Nov 2020).
- 8 Harris PA, Taylor R, Thielke R, *et al*. Research electronic data capture (REDCap)--a metadata-driven methodology and workflow process for providing translational research informatics support. *J Biomed Inform* 2009;**42**:377–81. doi:10.1016/j.jbi.2008.08.010
- 9 Clinical Research Network. <https://www.nihr.ac.uk/explore-nihr/support/clinical-research->

1  
2  
3 network.htm (accessed 30 Nov 2020).  
4

5 10 Wagner M, Lamos V, Cox IJ, *et al*. The added value of online user-generated content in  
6 traditional methods for influenza surveillance. *Sci Rep* 2018;**8**:13963. doi:10.1038/s41598-  
7 018-32029-6  
8

9 11 Lamos V, Majumder MS, Yom-Tov E, *et al*. Tracking COVID-19 using online search. arXiv  
10 [cs.SI]. 2020.<http://arxiv.org/abs/2003.08086v10>  
11  
12  
13  
14  
15  
16  
17  
18  
19  
20  
21  
22  
23  
24  
25  
26  
27  
28  
29  
30  
31  
32  
33  
34  
35  
36  
37  
38  
39  
40  
41  
42  
43  
44  
45  
46  
47  
48  
49  
50  
51  
52  
53  
54  
55  
56  
57  
58  
59  
60



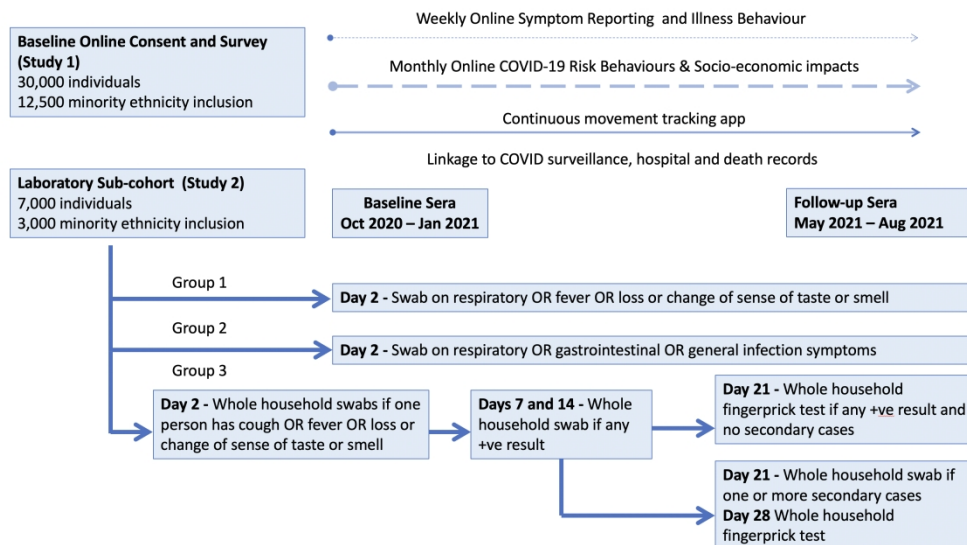

Figure 1. Overview of cohort recruitment and data collection for the Virus Watch household community cohort study.

# BMJ Open

## Risk factors, symptom reporting, healthcare-seeking behaviour and adherence to public health guidance: protocol for Virus Watch, a prospective community cohort study

|                               |                                                                                                                                                                                                                                                                                                                                                                                                                                                                                                                                                                                                                                                                                                                                                                                                                                                                                                                                                                                                                                                                                                                                                                                                                                                                                                                                                                                                                                                                                                                                                                                                                                                                                                                                                                                                                                                                                                                                                                                                                                                                                                                                                                                                                                                                                                                     |
|-------------------------------|---------------------------------------------------------------------------------------------------------------------------------------------------------------------------------------------------------------------------------------------------------------------------------------------------------------------------------------------------------------------------------------------------------------------------------------------------------------------------------------------------------------------------------------------------------------------------------------------------------------------------------------------------------------------------------------------------------------------------------------------------------------------------------------------------------------------------------------------------------------------------------------------------------------------------------------------------------------------------------------------------------------------------------------------------------------------------------------------------------------------------------------------------------------------------------------------------------------------------------------------------------------------------------------------------------------------------------------------------------------------------------------------------------------------------------------------------------------------------------------------------------------------------------------------------------------------------------------------------------------------------------------------------------------------------------------------------------------------------------------------------------------------------------------------------------------------------------------------------------------------------------------------------------------------------------------------------------------------------------------------------------------------------------------------------------------------------------------------------------------------------------------------------------------------------------------------------------------------------------------------------------------------------------------------------------------------|
| Journal:                      | <i>BMJ Open</i>                                                                                                                                                                                                                                                                                                                                                                                                                                                                                                                                                                                                                                                                                                                                                                                                                                                                                                                                                                                                                                                                                                                                                                                                                                                                                                                                                                                                                                                                                                                                                                                                                                                                                                                                                                                                                                                                                                                                                                                                                                                                                                                                                                                                                                                                                                     |
| Manuscript ID                 | bmjopen-2020-048042.R1                                                                                                                                                                                                                                                                                                                                                                                                                                                                                                                                                                                                                                                                                                                                                                                                                                                                                                                                                                                                                                                                                                                                                                                                                                                                                                                                                                                                                                                                                                                                                                                                                                                                                                                                                                                                                                                                                                                                                                                                                                                                                                                                                                                                                                                                                              |
| Article Type:                 | Protocol                                                                                                                                                                                                                                                                                                                                                                                                                                                                                                                                                                                                                                                                                                                                                                                                                                                                                                                                                                                                                                                                                                                                                                                                                                                                                                                                                                                                                                                                                                                                                                                                                                                                                                                                                                                                                                                                                                                                                                                                                                                                                                                                                                                                                                                                                                            |
| Date Submitted by the Author: | 29-Mar-2021                                                                                                                                                                                                                                                                                                                                                                                                                                                                                                                                                                                                                                                                                                                                                                                                                                                                                                                                                                                                                                                                                                                                                                                                                                                                                                                                                                                                                                                                                                                                                                                                                                                                                                                                                                                                                                                                                                                                                                                                                                                                                                                                                                                                                                                                                                         |
| Complete List of Authors:     | <p>Hayward, Andrew; UCL, Institute of Epidemiology and Health Care<br/> Fragaszy, Ellen; UCL, Centre for Public Health Data Science, Institute of Health Informatics; LSHTM, Department of Infectious Disease Epidemiology<br/> Kovar, Jana; UCL, Institute of Epidemiology and Health Care<br/> Nguyen, Vincent; UCL, Institute of Epidemiology and Health Care; University College London, Centre for Public Health Data Science, Institute of Health Informatics<br/> Beale, Sarah; UCL, Institute of Epidemiology and Health Care; University College London, Centre for Public Health Data Science, Institute of Health Informatics<br/> Byrne, Thomas; UCL, Centre for Public Health Data Science, Institute of Health Informatics<br/> Aryee, Anna; University College London, Centre for Public Health Data Science, Institute of Health Informatics<br/> Hardelid, Pia; University College London, Centre for Paediatric Epidemiology and Biostatistics, Institute of Child Health<br/> Wijlaars, Linda; UCL, Population, Policy and Practice; University College London, Primary Care and Population Health<br/> Fong, Wing Lam Erica; University College London, Centre for Public Health Data Science, Institute of Health Informatics<br/> Geismar, Cyril; University College London, Institute of Epidemiology and Health Care; University College London, Centre for Public Health Data Science, Institute of Health Informatics<br/> Patel, Parth; University College London, Centre for Public Health Data Science, Institute of Health Informatics<br/> Shrotri, Madhumita; University College London, Centre for Public Health Data Science, Institute of Health Informatics<br/> Navaratnam, Annalan M D; University College London, Institute of Epidemiology and Health Care; University College London, Centre for Public Health Data Science, Institute of Health Informatics<br/> Nastouli, Eleni ; Francis Crick Institute; University College London, Department of Population, Policy and Practice<br/> Spyer, Moira; Francis Crick Institute<br/> Killingley, Ben; University of Nottingham School of Medicine; University College London Hospital<br/> Cox, Ingemar; UCL, Department of Computer Science<br/> Lamos, Vasileios; University College London, Department of Computer</p> |

|                                                    |                                                                                                                                                                                                                                                                                                                                                                                                                                                                                                                                                                                                                                                                                                                                                                                                                                                                       |
|----------------------------------------------------|-----------------------------------------------------------------------------------------------------------------------------------------------------------------------------------------------------------------------------------------------------------------------------------------------------------------------------------------------------------------------------------------------------------------------------------------------------------------------------------------------------------------------------------------------------------------------------------------------------------------------------------------------------------------------------------------------------------------------------------------------------------------------------------------------------------------------------------------------------------------------|
|                                                    | <p>Science<br/> McKendry, Rachel; University College London, London Centre for Nanotechnology and Division of Medicine<br/> Liu, Yunzhe; University College London, SpaceTimeLab, Civil, Environmental and Geomatic Engineering.<br/> Cheng, Tao; University College London, SpaceTimeLab, Department of Civil, Environmental and Geomatic Engineering<br/> Johnson, Anne; University College London, Institute for Global Health<br/> Michie, Susan; University College London, Centre for Behaviour Change<br/> Gibbs, Jo; University College London, Institute for Global Health<br/> Gilson, Richard; University College London, Institute for Global Health<br/> Rodger, Alison; UCL, Institute for Global Health; Royal Free London NHS Foundation Trust<br/> Aldridge, Robert; UCL, Centre for Public Health Data Science, Institute of Health Informatics</p> |
| <b>&lt;b&gt;Primary Subject Heading&lt;/b&gt;:</b> | Public health                                                                                                                                                                                                                                                                                                                                                                                                                                                                                                                                                                                                                                                                                                                                                                                                                                                         |
| <b>Secondary Subject Heading:</b>                  | Epidemiology, Infectious diseases                                                                                                                                                                                                                                                                                                                                                                                                                                                                                                                                                                                                                                                                                                                                                                                                                                     |
| <b>Keywords:</b>                                   | COVID-19, Public health < INFECTIOUS DISEASES, Epidemiology < INFECTIOUS DISEASES                                                                                                                                                                                                                                                                                                                                                                                                                                                                                                                                                                                                                                                                                                                                                                                     |
|                                                    |                                                                                                                                                                                                                                                                                                                                                                                                                                                                                                                                                                                                                                                                                                                                                                                                                                                                       |

SCHOLARONE™  
Manuscripts

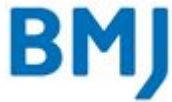

I, the Submitting Author has the right to grant and does grant on behalf of all authors of the Work (as defined in the below author licence), an exclusive licence and/or a non-exclusive licence for contributions from authors who are: i) UK Crown employees; ii) where BMJ has agreed a CC-BY licence shall apply, and/or iii) in accordance with the terms applicable for US Federal Government officers or employees acting as part of their official duties; on a worldwide, perpetual, irrevocable, royalty-free basis to BMJ Publishing Group Ltd ("BMJ") its licensees and where the relevant Journal is co-owned by BMJ to the co-owners of the Journal, to publish the Work in this journal and any other BMJ products and to exploit all rights, as set out in our [licence](#).

The Submitting Author accepts and understands that any supply made under these terms is made by BMJ to the Submitting Author unless you are acting as an employee on behalf of your employer or a postgraduate student of an affiliated institution which is paying any applicable article publishing charge ("APC") for Open Access articles. Where the Submitting Author wishes to make the Work available on an Open Access basis (and intends to pay the relevant APC), the terms of reuse of such Open Access shall be governed by a Creative Commons licence – details of these licences and which [Creative Commons](#) licence will apply to this Work are set out in our licence referred to above.

Other than as permitted in any relevant BMJ Author's Self Archiving Policies, I confirm this Work has not been accepted for publication elsewhere, is not being considered for publication elsewhere and does not duplicate material already published. I confirm all authors consent to publication of this Work and authorise the granting of this licence.

# Risk factors, symptom reporting, healthcare-seeking behaviour and adherence to public health guidance: protocol for Virus Watch, a prospective community cohort study

Andrew Hayward<sup>1</sup>, Ellen Fragaszy<sup>2,3</sup>, Jana Kovar<sup>1</sup>, Vincent Nguyen<sup>1,2</sup>, Sarah Beale<sup>1,2</sup>, Thomas Byrne<sup>2</sup>, Anna Aryee<sup>2</sup>, Pia Hardelid<sup>4</sup>, Linda Wijlaars<sup>4</sup>, Wing Lam Erica Fong<sup>2</sup>, Cyril Geismar<sup>1,2</sup>, Parth Patel<sup>2</sup>, Madhumita Shrotri<sup>2</sup>, Annalan M D Navaratnam<sup>1,2</sup>, Eleni Nastouli<sup>5,6</sup>, Moira Spyer<sup>6</sup>, Ben Killingley<sup>7,8</sup>, Ingemar Cox<sup>9</sup>, Vasileios Lampos<sup>9</sup>, Rachel A McKendry<sup>10</sup>, Yunzhe Liu<sup>11</sup>, Tao Cheng<sup>11</sup>, Anne M Johnson<sup>13</sup>, Susan Michie<sup>12</sup>, Jo Gibbs<sup>13</sup>, Richard Gilson<sup>13</sup>, Alison Rodger<sup>13,14</sup>, Robert W Aldridge<sup>2</sup>

## Affiliations

1 Institute of Epidemiology and Health Care, University College London, London, UK

2 Centre for Public Health Data Science, Institute of Health Informatics, University College London, UK.

3 Department of Infectious Disease Epidemiology, London School of Hygiene and Tropical Medicine, Keppel Street, London, UK.

4 UCL Great Ormond Street Institute of Child Health, London, UK.

5 Department of Population, Policy and Practice, UCL Great Ormond Street Institute of Child Health, London, UK.

6 Francis Crick Institute, London, UK.

7 Health Protection and Influenza Research Group, Division of Epidemiology and Public Health, University of Nottingham School of Medicine, Nottingham, United Kingdom.

8 University College London Hospital, London, United Kingdom.

9 Department of Computer Science, University College London, London, UK.

10 London Centre for Nanotechnology and Division of Medicine, London, UCL.

11 SpaceTimeLab, Department of Civil, Environmental and Geomatic Engineering, University College London, London, UK.

12 Centre for Behaviour Change, University College London, London, UK.

13 Institute for Global Health, University College London, London, UK.

14. Royal Free London NHS Foundation Trust, London, UK.

## Corresponding Author:

1  
2  
3 Andrew Hayward, Institute of Epidemiology and Health Care, University College London,  
4 London, WC1E 7HB, UK  
5  
6

7  
8 Emails:  
9

10  
11 Andrew Hayward [a.hayward@ucl.ac.uk](mailto:a.hayward@ucl.ac.uk), Ellen Fragaszy [ellen.fragaszy@ucl.ac.uk](mailto:ellen.fragaszy@ucl.ac.uk), Jana Kovar  
12 [j.kovar@ucl.ac.uk](mailto:j.kovar@ucl.ac.uk), Vincent Nguyen [vincent.nguyen.11@ucl.ac.uk](mailto:vincent.nguyen.11@ucl.ac.uk), Sarah Beale  
13 [sarah.beale.19@ucl.ac.uk](mailto:sarah.beale.19@ucl.ac.uk), Thomas Byrne [t.byrne@ucl.ac.uk](mailto:t.byrne@ucl.ac.uk), Anna Aryee [a.aryee@ucl.ac.uk](mailto:a.aryee@ucl.ac.uk),  
14 Pia Hardelid [p.hardelid@ucl.ac.uk](mailto:p.hardelid@ucl.ac.uk), Linda Wijlaars [linda.wijlaars@ucl.ac.uk](mailto:linda.wijlaars@ucl.ac.uk), Wing Lam Erica  
15 Fong [erica.fong.16@ucl.ac.uk](mailto:erica.fong.16@ucl.ac.uk), Cyril Geismar [cyril.geismar.16@ucl.ac.uk](mailto:cyril.geismar.16@ucl.ac.uk), Parth Patel  
16 [parth.patel@ucl.ac.uk](mailto:parth.patel@ucl.ac.uk), Madhumita Shrotri [madhumita.shrotri.09@ucl.ac.uk](mailto:madhumita.shrotri.09@ucl.ac.uk), Annalan M D  
17 Navaratnam [a.navaratnam@ucl.ac.uk](mailto:a.navaratnam@ucl.ac.uk), Eleni Nastouli [e.nastouli@ucl.ac.uk](mailto:e.nastouli@ucl.ac.uk), Moira Spyer  
18 [moira.spyer@ucl.ac.uk](mailto:moira.spyer@ucl.ac.uk), Ben Killingley [ben.killingley@nhs.net](mailto:ben.killingley@nhs.net), Ingemar Cox [i.cox@ucl.ac.uk](mailto:i.cox@ucl.ac.uk),  
19 Vasileios Lampos [v.lampos@ucl.ac.uk](mailto:v.lampos@ucl.ac.uk), Rachel A McKendry [r.a.mckendry@ucl.ac.uk](mailto:r.a.mckendry@ucl.ac.uk) Tao  
20 Cheng [tao.cheng@ucl.ac.uk](mailto:tao.cheng@ucl.ac.uk), Anne M Johnson [anne.johnson@ucl.ac.uk](mailto:anne.johnson@ucl.ac.uk), Susan Michie  
21 [s.michie@ucl.ac.uk](mailto:s.michie@ucl.ac.uk), Jo Gibbs [jo.gibbs@ucl.ac.uk](mailto:jo.gibbs@ucl.ac.uk), Richard Gilson [r.gilson@ucl.ac.uk](mailto:r.gilson@ucl.ac.uk), Alison  
22 Rodger [alison.rodger@ucl.ac.uk](mailto:alison.rodger@ucl.ac.uk), Robert W Aldridge [r.aldridge@ucl.ac.uk](mailto:r.aldridge@ucl.ac.uk)  
23  
24  
25  
26  
27  
28  
29  
30

31 Word count: 4,600  
32  
33  
34  
35  
36  
37  
38  
39  
40  
41  
42  
43  
44  
45  
46  
47  
48  
49  
50  
51  
52  
53  
54  
55  
56  
57  
58  
59  
60

## Abstract

**Introduction:** The Coronavirus (COVID-19) Pandemic has caused significant global mortality and impacted lives around the world. Virus Watch aims to provide evidence on which public health approaches are most likely to be effective in reducing transmission and impact of the virus, and will investigate community incidence, symptom profiles, and transmission of COVID-19 in relation to population movement and behaviours.

**Methods and analysis:** Virus Watch is a household community cohort study of acute respiratory infections in England & Wales and will run from June 2020 to August 2021. The study aims to recruit 50,000 people, including 12,500 from minority ethnic backgrounds, for an online survey cohort and monthly antibody testing using home finger prick kits. Nested within this larger study will be a sub-cohort of 10,000 individuals, including 3,000 people from minority ethnic backgrounds. This cohort of 10,000 people will have full blood serology taken between October 2020 and January 2021 and repeat serology between May 2021 and August 2021. Participants will also post self-administered nasal swabs for PCR assays of SARS-CoV-2 and will follow one of three different PCR testing schedules based upon symptoms.

**Ethics and dissemination:** This study has been approved by the Hampstead NHS Health Research Authority Ethics Committee. Ethics approval number – 20/HRA/2320. We are monitoring participant queries and using these to refine methodology where necessary, and are providing summaries and policy briefings of our preliminary findings to inform public health action by working through our partnerships with our study advisory group, Public Health England, NHS and Government Scientific Advisory panels.

Keywords: COVID-19; UK; cohort study; epidemiology

## Strengths and limitations of this study

- 1  
2  
3 1. Virus Watch is a large national household community cohort study of the  
4 occurrence and risk factors for COVID-19 infection that aims to recruit 50,000  
5 people, including 12,500 from minority ethnic backgrounds.  
6  
7
- 8 2. Virus Watch is designed to estimate incidence of PCR confirmed COVID-19 in  
9 those with respiratory and non-respiratory presentations and the incidence of  
10 hospitalisation among PCR confirmed COVID-19 cases.  
11  
12
- 13 3. Virus Watch will measure effectiveness and impact of recommended COVID-19  
14 control measures including testing, isolation, social distancing, respiratory and  
15 hand hygiene measures on risk of respiratory infection.  
16  
17
- 18 4. Only households with a lead householder able to speak English were able to take  
19 part in the study up until March 2021. From March 2021, translations of the online  
20 survey will be implemented for individuals recruited from this point onwards.  
21  
22
- 23 5. Only households of up to six people were eligible for inclusion and they were also  
24 required to have access to an internet connection. These restrictions will limit the  
25 generalisability to large or multigenerational households, and those without  
26 access to the internet.  
27  
28  
29  
30  
31  
32  
33  
34  
35

## 36 Introduction

37  
38  
39 The Coronavirus disease 2019 (COVID-19) pandemic has caused millions of deaths  
40 and impacted lives around the world with the closure of schools, workplaces, and  
41 limitations on freedom of movement. Vaccines and effective scalable treatments for  
42 COVID-19 have been developed and whilst these are rolled out across England and  
43 Wales we will need to rely on other measures to stop the spread of COVID-19. We will  
44 also require studies to examine their long-term effectiveness as they are implemented  
45 across England and Wales.  
46  
47  
48  
49

50 Governments, including those of the UK devolved nations, are adopting a wide range of  
51 control measures to limit the spread of infection. These include isolation of people with  
52 COVID-19 symptoms and their household contacts, widespread testing and contact  
53 tracing, digital contact tracing using mobile phone apps, broad social distancing  
54  
55  
56  
57  
58  
59  
60



1  
2  
3 measures, and local control measures. Environmental cleaning, hand hygiene and face  
4 mask use are also advised.

5  
6 Much of our current knowledge of COVID-19 comes from observations at the more  
7 severe end of the disease spectrum, in hospitalised patients and individuals who die  
8 having tested positive for the disease.[1–3] Although large-scale studies of prevalence  
9 of PCR positive infection and seroprevalence have been established, there is currently  
10 limited information on symptom profiles through the course of illness in non hospitalised  
11 populations, children, social and behavioural risk factors for infection, strength and  
12 duration of immunity, household and community transmission risk, and population  
13 behaviours during periods of wellness and illness (including social contacts, use of  
14 public spaces, testing behaviours, isolation, mask use, hand and respiratory hygiene).  
15 This information can only be gathered accurately through prospective large-scale  
16 community cohorts. Our experience of the MRC/Wellcome Flu Watch study[4,5] and  
17 ESRC Bug Watch[6] study has allowed us to rapidly establish a national household  
18 cohort study of 50,000 individuals.

19  
20 Virus Watch aims to provide evidence on which public health approaches are most  
21 likely to be effective in reducing the spread and impact of the virus and will investigate  
22 community incidence, symptom profiles, and transmission of COVID-19 in relation to  
23 population movement and behaviour.  
24  
25  
26  
27  
28  
29  
30  
31  
32  
33  
34  
35  
36  
37  
38  
39  
40  
41  
42  
43  
44  
45  
46  
47  
48  
49  
50  
51  
52  
53  
54  
55  
56  
57  
58  
59  
60

## Methods and analysis

### Study design and setting

Virus Watch is a household community cohort study of acute respiratory infections in England and Wales covering the second and potential subsequent waves of the COVID-19 pandemic. The study period will be 1st June 2020 to 31st August 2021 . The study aims to recruit 50,000 individuals, including 12,500 from minority ethnic backgrounds for an online survey cohort (study 1). Nested within this larger study will be a sub-cohort of 10,000 individuals (study 2), including 3,000 people from minority ethnic backgrounds. Participants in this laboratory sub-cohort will be selected based on their geographical distance away from one of our blood taking clinics; either a 10km radius from a clinic in cities, or a 20km radius in rural areas. Participants will be balanced to be representative of the UK population for sex, age and region. Figure 1 provides an overview of the study design.

Households self-select into the study if they live in England and Wales and all members of a household need to consent to take part in the study to meet our inclusion criteria (Appendix 1). Households need to have an internet connection on a phone, tablet or computer, email, and, up until the end of November 2020, at least one adult household member that can read English. From March 2020 onwards, online surveys will be translated into multiple languages. A household is defined as one or more people (not necessarily related) whose usual residence (4 days/week or more) is at the same address. These householders share cooking facilities, a living room or sitting room or dining area.

### Primary outcomes

#### *Study 1: Online Survey Cohort*

1. Incidence of respiratory infection symptoms, including COVID-19 disease case definitions.

2. Effectiveness and impact of recommended COVID-19 control measures including testing, isolation, social distancing, respiratory and hand hygiene measures on risk of respiratory infection.
3. Frequency of adherence with public-health recommendations for these control measures.
4. Proportion of community infections that result in hospital admissions and death.
5. Vaccine effectiveness against asymptomatic and symptomatic infections.

### *Study 2: Laboratory testing sub-cohort*

1. Incidence of PCR confirmed COVID-19.
2. Incidence of PCR confirmed COVID-19 in those with non-respiratory presentations.
3. Incidence of hospitalisation among PCR confirmed COVID-19 cases.
4. Proportion of individuals with SARS-CoV-2 antibodies acquired through natural infection to pandemic coronavirus.
5. Proportion of individuals with cross-reacting antibodies to seasonal coronaviruses acquiring (or not) SARS-CoV-2.
6. Household secondary attack rates.
7. Protective effect of antibodies on infection and re-infection as well as the severity and spectrum of presentation.

## **Recruitment**

We will use the Royal Mail Post Office Address File to generate a list of residential address lists from which households can be sampled and sent Virus Watch recruitment postcards to. The proposed initial sample design is a single-stage stratified probability sample where implicit stratification is employed to benefit from the precision gains that stratified sampling can bring. Within each region, residential addresses are sorted by (a) quintiles of Index of Multiple Deprivation 2019 (IMD), (b) within quintiles by Local Authorities, (c) postcodes and (d) address. We will perform this in the nine Government Office Regions of England as well as Wales (10 study regions in total).

1  
2  
3  
4  
5 We will assess recruitment rates and the representativeness of this initial sample  
6 following the mail out of 50,000 postcards. If recruitment is lower than expected or  
7 under-representative of the national population, we will redesign our recruitment  
8 campaign to include a range of methods in order to build the cohort. This mixed  
9 recruitment strategy will be flexible and use a variety of methods including social media,  
10 study leaflet drops, text messaging, personalised letters and incentives. Social media  
11 adverts will be used to inform individuals about the study and direct them to our website  
12 <http://ucl-virus-watch.net/> where they can read the participant information sheets and  
13 consent to taking part. Digital invitations will also be created for sharing via WhatsApp.  
14 Text messages and postal letters inviting patients from their General Practitioner clinics  
15 will be organised via Local Clinical Research Networks.[7] We will also work with trusted  
16 community partners and religious organisations to promote recruitment into the study.  
17  
18  
19  
20  
21  
22  
23  
24  
25  
26

27 In order for a household to be enrolled, they will require an internet connection (Wi-Fi,  
28 fixed or on a mobile phone), email address, and all household members must agree to  
29 take part. Households will nominate a lead householder who will submit study  
30 questionnaires. Up until March 2021, the lead householder will need to be able to read  
31 English to support other household members in survey completion. From March 2021  
32 onwards, online surveys will be translated into multiple languages and this will no longer  
33 be an inclusion criteria. A household is defined as one or more people (not necessarily  
34 related) whose usual residence (4 days/week or more) is at the same address. These  
35 householders share cooking facilities, and may share a living room or sitting room or  
36 dining area if available. Households with more than six members will not be eligible for  
37 the study - this criteria was set due to limitations of the REDCap survey infrastructure  
38 which did not function correctly when attempting to work with household sizes of greater  
39 than six during our pilot testing of the survey.  
40  
41  
42  
43  
44  
45  
46  
47  
48  
49  
50

51 Virus Watch is powered for our primary aims in study 2 and the estimation of  
52 population-level symptomatic COVID-19 attack rate over time. Recruiting a cohort that  
53 is representative of the population is time consuming as it requires an initial invitation  
54 into a study followed by multiple follow-up contacts encouraging invited individuals to  
55  
56  
57  
58  
59  
60

1  
2  
3 register. Given the urgency of the public health situation to roll out our study as quickly  
4 as possible we chose a different approach whereby we recruit a large cohort of 50,000  
5 individuals and from within that cohort we select a sub-sample for the testing cohort  
6 (sub-cohort 1) which is representative of the population in terms of age, sex, ethnicity,  
7 region, household size and proportion of households with children. The larger cohort  
8 will be important in assessing rates and predictors of less frequent outcomes such as  
9 hospitalisation and death. Given recent information of marked ethnicity differences in  
10 mortality rates from COVID-19 we also chose to recruit an ethnicity sample designed to  
11 be sufficiently large to provide early indicators of whether these differential mortality  
12 rates are due to differences in disease incidence or in differences in severity or both.  
13  
14  
15  
16  
17  
18  
19  
20  
21  
22

## 23 Power Analysis

24  
25 The testing sub-cohort is powered for accurate weekly age-specific disease incidence  
26 rates to be measured assuming 20-30% clinical attack rate over 18 weeks. With a  
27 clinical attack rate of 30% of whom 20% need hospitalisation, and 0.5% die we expect  
28 the following number of outcome events in our testing cohort of 10,000 individuals in  
29 study 2: 3000 COVID-19 illnesses, 600 hospitalised cases, and 15 deaths. At one  
30 month into the outbreak we would be able to detect a 1.7-fold greater risk of disease in  
31 a population subgroup that constitutes 1/5 of the population, and by 2 months the  
32 detectable relative risk would be only 1.2. At one month we could detect a 4% hospital  
33 admission rate amongst cases with 95% CI of 0.5-6.8, and by 2 months the confidence  
34 intervals would narrow to 3.1-4.1. We have used estimates of the expected number of  
35 events over time to provide an indication of the fact that the cohort is sufficiently large to  
36 provide valuable information through the course of the pandemic. Sample size  
37 calculations have been informed by a realistic assessment of what we can achieve  
38 based on our previous experience[4,6]. For the serology cohort of 3000 people from  
39 minority ethnic backgrounds we assume a modest design effect (DE) due to household  
40 and geographical clustering, and 500 participants for six different minority ethnic  
41 backgrounds would enable the measurement of a cumulative incidence of 10% with  
42 95% confidence intervals of 3% by each minority ethnic group.  
43  
44  
45  
46  
47  
48  
49  
50  
51  
52  
53  
54  
55  
56  
57  
58  
59  
60

## Participant materials and incentives

Participant information sheets will be held on our study website (these along with consent forms were translated into 6 languages and a further 3 languages were added from December 2020). In order to participate, the whole household must take part. Each adult participant will need to read through study information, and provide online informed consent for themselves and any children they are legally responsible for. Children aged 6-9 and 10-15 years respectively will also be asked to read through age specific study participant information sheets and provide online informed assent. For children aged 5 and under, parents/guardians will consent on their behalf. Informed consent data will be securely stored in UCL's Data Safe Haven which has been certified to the ISO27001 information security standard and conforms to NHS Digital's Data Security and Protection Toolkit. Local study teams will re-consent participants face to face, prior to undertaking blood sampling, and adult participants in study 2 will be offered a £10 voucher to reimburse travel costs. From February 2021, invitation letters sent by GP clinics will include a £20 voucher for households that agree to take part in the study.

## Data collection and follow-up

### *Study 1: Online Survey Cohort*

The online survey cohort will collect data and follow up participants through six different sources. Survey data will be collected using Research Electronic Data Capture (REDCap) electronic data capture tools hosted on the UCL Data Safe Haven (Appendix 2, Appendix 3, Appendix 4).[8] REDCap is a secure, web-based application for research studies. The UCL Data Safe Haven provides a technical solution for storing, handling and analysing identifiable data. It has been certified to the ISO27001 information security standard and conforms to NHS Digital's Data Security and Protection Toolkit .

1) Baseline Survey. The Lead Householder will be asked to complete an online baseline survey for each

1  
2  
3 member of their household. Information collected includes: demographics, occupation,  
4 income, ethnicity, country of birth, year of entry to UK, chronic medical conditions,  
5 medications, pregnancy status, vaccines, mode of transport to work, any previous  
6 contact with someone with COVID-19, previous symptoms of COVID-19-like illness and  
7 infection-prevention behaviours such as social distancing and hand hygiene.  
8  
9  
10  
11  
12

13 2) Illness Surveys.

14  
15 Participants will be followed-up weekly via an email with a link to an illness survey. This  
16 is a weekly survey of the presence or absence of symptoms that could indicate COVID-  
17 19 disease including respiratory, general infection symptoms or gastrointestinal  
18 symptoms. During illness, prospective daily symptom recording, quality of life, health  
19 seeking behaviour (NHS 111, GP in person, GP by phone, A&E, Pharmacy, Hospital),  
20 treatments, and NHS investigations will be recorded. This survey will also include any  
21 respiratory and hand hygiene measures, self-isolation, activities and social contact,  
22 travel and face mask use. Questions around behavioural interventions, such as mask  
23 wearing and social distancing, aim to reflect the context and frequency/degree to which  
24 behaviours are practiced according to governmental and public health guidelines and  
25 relevant scientific literature. The survey includes questions to the household on  
26 activities undertaken in the week prior to symptom onset. The weekly survey will also be  
27 used to capture test results received from outside the study and requests to self isolate  
28 eg. via the UK Test-Trace-Isolate system. The weekly survey will also ask about  
29 participants' COVID-19 vaccination uptake, including their date of vaccination, dose (i.e.  
30 first or second), and which vaccine was administered.  
31  
32  
33  
34  
35  
36  
37  
38  
39  
40  
41  
42  
43  
44

45 3) Monthly Surveys. A  
46 number of questions will be asked every month. The monthly surveys also provide  
47 flexibility to ask additional questions (eg. behavioural changes) to reflect any new  
48 government directives on social distancing, testing, contact tracing, and vaccine  
49 delivery. Core questions will also allow us to follow up reasons for any non-response in  
50 a given month- (e.g. because of illness, hospitalisation or holiday). We will also ask  
51 about online health information seeking, social distancing, including recent (week  
52 before) contacts, activities, places visited and hand & respiratory hygiene. As with the  
53  
54  
55  
56  
57  
58  
59  
60

1  
2  
3 weekly questionnaire, questions around behavioural practices will reflect governmental  
4 and public health guidelines and the scientific literature; monthly questionnaires will also  
5 investigate barriers and enablers to health-related behaviours using purpose-developed  
6 questionnaires based on the Capability, Motivation, Opportunity, Behaviour (COM-B)  
7 model. We will also ask about finances, employment, and mental health to see how the  
8 COVID-19 response is affecting participants' wellbeing and ability to work. We will ask  
9 about access to healthcare for non-COVID-19 health problems to explore the indirect  
10 health impacts of the pandemic. We will ask about any COVID-19 PCR or antibody test  
11 results performed outside the study and not already reported through baseline surveys.  
12 We will ask about influenza vaccine uptake and COVID-19 vaccination intentions.  
13  
14  
15  
16  
17  
18  
19  
20  
21

22 4) Data Linkage. NHS  
23 Digital will undertake quarterly data linkage between cohort 1 and Hospital Episode  
24 Statistics (HES), which includes admitted patient and critical care episodes, outpatient  
25 department bookings, and emergency care contacts. This linkage will also include  
26 Office for National Statistics mortality data, COVID-19 vaccination records, and virology  
27 testing data routinely collected by Public Health England, Public Health Wales, and the  
28 Department of Health and Social Care through 'Pillar 1' (testing in hospital patients and  
29 health and care workers) and 'Pillar 2' (community testing). These data sources will be  
30 linked to the cohort using name, NHS numbers, dates of birth and postal address.  
31 Identifying variables will be removed before the linked data are transferred back to UCL  
32 for analysis. These data linkages will continue for up to 5 years after the end of the  
33 study as we anticipate COVID-19 will become a recurring winter infection and we wish  
34 to understand its impact on health services in subsequent years. These linkage studies  
35 will identify any participants that have been admitted to hospital or died due to causes  
36 that could be directly or indirectly linked to the COVID-19 pandemic. Indirect causes  
37 include those related to limitations in healthcare access during the pandemic.  
38 Reductions in the use of routine health services will also be monitored via linkage to  
39 HES data.  
40  
41  
42  
43  
44  
45  
46  
47  
48  
49  
50  
51  
52  
53

54 5) Geo-location Tracking.  
55 All adult participants will be asked about optional consent to use a secure geo-location  
56  
57  
58  
59  
60



1  
2  
3 tracking app (Tracker for ArcGIS) installed on their mobile phone for the duration of the  
4 study.  
5  
6  
7

8 6) Monthly antibody testing using home finger prick kits. Adults aged 18 years and  
9 over enrolled in the online survey cohort, with the exception of those in laboratory  
10 testing sub-cohort Group 3, will be offered monthly antibody testing starting from  
11 February 2021 and continuing until the end of the study, using home finger prick kits for  
12 self-collection of capillary blood samples. Those aged under 18 and living with adults  
13 enrolled in monthly antibody testing will continue completing online surveys. Monthly  
14 antibody testing (February-August 2021) will utilise CE-marked at home finger prick kits  
15 designed to collect small-volume (400-600 microlitres) capillary blood samples.  
16 Samples are self-collected by adult participants and returned to a UKAS-accredited  
17 laboratory via pre-paid post, where they will be tested for anti-Nucleocapsid and anti-  
18 Spike antibodies using validated electro-chemiluminescence immunoassays.  
19  
20  
21  
22  
23  
24  
25  
26  
27  
28

### 29 *Study 2: Laboratory testing sub-cohort*

30  
31  
32

33 All participants agreeing to take part in the main cohort (study 1) will be asked to  
34 provide consent to be contacted and invited to participate in one of the three laboratory  
35 testing sub-groups. This will enable a cohort of 10,000 individuals selected from the  
36 main cohort of 50,000 individuals to be maximally representative of the population of  
37 England and Wales. All participants taking part in study 2 will be asked to use the  
38 national test, trace and isolation system in addition to providing samples as part of Virus  
39 Watch.  
40  
41  
42  
43  
44  
45

46 Study 2 will consist of three groups that will follow different schedules of antibody testing  
47 and nasal/throat swabs for PCR testing.  
48  
49  
50

51 Group 1 ( $n=7000$ ):

52 With data from this group we aim to identify infection in those with a wide range of  
53 respiratory symptoms. Participants will be asked to submit a nose/throat swab if they  
54 experience two consecutive days of: fever ( $>37.8$ ), feeling feverish, or new persistent  
55  
56  
57  
58  
59  
60

1  
2  
3 cough, or loss or altered sense of smell or taste (COVID-19 suspected case definition),  
4 or shortness of breath, or ear pain or change in hearing, or sore throat, or sneezing, or  
5 blocked nose, or runny nose, or wheeze or sinus pain or congestion (other respiratory  
6 manifestations).  
7  
8  
9

10  
11  
12 Group 2 ( $n=1000$ ):

13 This group aims to identify the importance of non-respiratory presentations. Participants  
14 will be asked to submit a self-taken nasal/throat swab for PCR identification of COVID-  
15 19 and other respiratory viruses if:  
16  
17

- 18 ● Either - two consecutive days of respiratory symptoms (e.g. cough, runny nose,  
19 sneezing, shortness of breath, sore throat, blocked nose, sinus pain or  
20 congestion, ear pain or change in hearing, wheezing, loss of or altered sense of  
21 taste or sense of smell).  
22
- 23 ● OR – two consecutive days of gastrointestinal symptoms (e.g. diarrhoea/loose  
24 stools, abdominal pain, nausea or vomiting, loss of appetite).  
25
- 26 ● OR - two consecutive days of general infection symptoms (e.g. feeling feverish,  
27 having a high temperature, feelings of severe unexplained tiredness, generalised  
28 muscle or joint aches)  
29  
30  
31  
32  
33  
34  
35

36 Group 3 ( $n = 2000$ ):

37 This group aims to identify the extent of household transmission. Participants will be  
38 asked to submit a nose/throat swab if they experience two consecutive days of cough or  
39 fever or loss of sense of taste or smell. Household contacts of the index case will also  
40 be asked to submit a swab on the same day whether or not they have symptoms.  
41  
42  
43  
44  
45

46 If any of the swabs indicate SARS-COV-2 infection, all household members will be  
47 asked to repeat the swab on Day 7 and Day 14. If there are no new SARS-COV-2  
48 cases in the household arising from swabs on Day 7 and 14 (assumed secondary  
49 cases) then all household members will be asked to undertake a home finger prick  
50 antibody test on Day 21. If there is one or more secondary cases in the household then  
51 the entire household will be asked to take an additional swab on day 21 and then  
52 undertake the fingerprint antibody tests on Day 28.  
53  
54  
55  
56  
57  
58  
59  
60

## *End of follow-up*

Online participant follow-up will end in August 2021 for households enrolled in monthly antibody testing, and in May 2021 for others, although, depending on the progression of COVID-19, we may ask participants to continue in the study for longer. Participants will be sent an exit survey. Participants will be contacted to arrange a second blood sample collection from April 2021. Follow-up through data linkage with Hospital Episode Statistics, COVID-19 vaccination records, and Mortality data will continue for 5 years after the end of the study.

## **Laboratory testing**

### *Antibody testing*

Study 2 will be using two different types of antibody tests. First, full blood serology will be taken between October 2020 and January 2021. We will use experienced health care professionals, including research nurses from the NIHR Clinical Research Networks.[9] Depending on local circumstances, visits to participants' homes to take blood may also be arranged. Children aged 15 years or less can opt out of having their blood taken but will be offered a finger prick antibody test conducted by a healthcare worker instead. All participants from laboratory group 3 will additionally be offered a finger prick antibody test at the same time as blood taking. From April 2021 until July 2021, we will invite all participants back for full blood tests or, for children who do not wish to have a full bleed, healthcare worker-delivered finger prick based antibody tests.

Families of children who have not been able to attend for a blood test, or for a healthcare worker-delivered finger prick antibody test, will be provided with postal kits to perform these at home. We also plan to use finger prick antibody testing where local clinics are no longer able to undertake full blood tests due to COVID-19 travel restrictions. Extremely clinically vulnerable participants will be sent home fingerprick tests instead of being asked to provide a serological sample.

### *Virus detection*

Participants will post swab samples for PCR assays of COVID-19, and subsequent testing for influenza virus, seasonal coronavirus, rhinovirus and respiratory syncytial virus (RSV). When COVID-19 is identified we will also undertake whole genome sequencing of the virus. Samples for COVID-19 diagnostics will be handled and processed according to the NHS and UCL guidance on sample handling during the COVID-19 pandemic.

COVID-19 PCR and serology results will be returned to participants via email message systems. These messages will include links to official support, information and advice from NHS and PHE as well as advice on how to interpret results based on current evidence. In laboratory group 3, where positive test results will trigger further testing of the household, the results email will also include details explaining the additional testing requests. We be not asking for inconclusive COVID-19 PCR results to be repeated

### **Statistical analysis**

Our primary analyses during the winter 2020/21 will focus on estimating age-specific weekly rates of symptoms and risk factors for PCR-confirmed COVID-19 illness and hospitalisation. For these analyses we will use poisson regression models that account for clustering by household using robust standard errors and we will explore the use of stratification or weighting of the sample by age and region as necessary to give nationally representative estimates. Weekly rates will be expressed per 100,000 person-weeks for ease of comparison with national surveillance data.

We will examine the proportion of the population infected during the first wave (e.g. Feb 2020 to Sept 2020) and second and potentially future pandemics waves. We will estimate the percentage of the population infected by calculating age and wave-specific rates of serological infection and PCR-confirmed disease per 100 person-seasons using poisson regression with robust standard errors to account for household-level clustering. A person-season will be defined by the epidemic curve in the cohort and

1  
2  
3 therefore rates will account for differential follow-up time during each epidemic peak. In  
4 these analyses we will examine risk factors for infection, disease, disease severity and  
5 disease transmission.  
6  
7

8  
9  
10 We will estimate the proportion of serologically confirmed SARS-CoV-2 infections  
11 leading to symptomatic disease. First, we will calculate age-adjusted attributable rates  
12 of illness due to infection (subtracting rates of respiratory illness in non seroconverters  
13 from those in seroconverters). Second, we will measure the proportion of  
14 seroconverters with PCR-confirmed COVID-19. Analyses plans will be developed prior  
15 to conducting all analyses.  
16  
17  
18  
19

20  
21  
22 We will estimate vaccine effectiveness against asymptomatic SARS-CoV-2 infections  
23 and against symptomatic COVID-19 using anti-Nucleocapsid seroconversion, positive  
24 PCR testing, and self-reported symptoms data. We will utilise both time-to-event and  
25 test-negative analytical frameworks. Using quantitative antibody data, we will assess the  
26 dynamics of anti-spike antibodies over time and the relationship between antibody titres  
27 and the risk of infection.  
28  
29  
30  
31

32  
33  
34 Whilst the study is being conducted, we will produce early, preliminary results and  
35 analyses for participants, the general public, government scientific advisory groups and  
36 policy makers in order to inform the public health response to the pandemic. These  
37 analyses will be reactive to the epidemiological circumstances and are therefore not  
38 defined in this protocol.  
39  
40  
41  
42

### 43 44 *Modelling*

45  
46  
47 We will build on our experience of working with PHE, Google, and Microsoft to use  
48 anonymous national or subnational aggregate web search engine data[10,11] to monitor  
49 the spreading of the disease. We will use our study data as ground-truth to train real-  
50 time disease prevalence estimation algorithms. We will annotate GPS tracking data into  
51 standard categories including time at work and home, social venues, supermarkets,  
52 hospitals, GPs, and transport mode for incorporation in classical epidemiological  
53 analyses. Integrating the linked survey data, we will develop a predictive spatio-  
54  
55  
56  
57  
58  
59

1  
2  
3 temporal transmission model to investigate the impact of various social distancing  
4 strategies.  
5  
6  
7

## 8 9 Missing data

10  
11  
12  
13 We have several strategies that attempt to address the issue of missing data. First, we  
14 have sought to minimise the amount and impact of missing data for key outcomes and  
15 exposures through the study design. For example, for a number of our primary  
16 outcomes (PCR+ illness, hospitalisation and death) and exposures (vaccination) we  
17 collect data both as self-reported and through data linkage with the relevant national  
18 datasets and registries. Second, we sought to minimise missing serological and virus-  
19 watch specific swabbing outcomes in adults by making willingness to provide relevant  
20 specimens a prerequisite to study registration. Third, we know from our experience of  
21 previous community cohort studies of acute infections (Flu Watch[4] and Bug Watch[6])  
22 that response to weekly surveys (where our symptom data is collected) is high at  
23 around 75%, which we believe is achieved by keeping these weekly data collections  
24 simple and quick to complete. We have aimed to replicate this approach in Virus Watch.  
25  
26 Forth, for important missing baseline demographic data (e.g. age and sex) we have  
27 created follow-up surveys to try and collect missing data at a later time in time. Fifth,  
28 where necessary, we will address missing data in our analyses and use multiple  
29 imputation methods if appropriate.  
30  
31  
32  
33  
34  
35  
36  
37  
38  
39  
40

## 41 Patient and Public Involvement

42  
43  
44 Due to the urgent nature of this study, we did not involve participants in its original  
45 design. We have previously conducted PPI to support similar community cohort studies  
46 of acute infections using similar methodologies. We have engaged the Young Persons'  
47 Advisory Group for research at Great Ormond Street Hospital to provide feedback on  
48 our Children's Participant Information Sheets. We have worked with the Race Equality  
49 Foundation and Doctors of the World in advising on the inclusion of people from  
50 minority ethnic backgrounds in Virus Watch and have set up an advisory group to inform  
51 the ongoing design and dissemination of health equity aspects of Virus Watch. They  
52  
53  
54  
55  
56  
57  
58  
59  
60

1  
2  
3 were not asked to assess the burden of the intervention and time required to participate  
4 in the research due to the urgent nature of setting the study up. This advisory group  
5 (consisting of lay members of the public, community leaders, charities and policy  
6 organisation) will guide our health equity analyses and steer us on its implications for  
7 people, communities and policy. The advisory group will also help us prioritise what  
8 information and results to share, when, and in what format.  
9  
10  
11  
12  
13  
14

## 15 **Ethics and dissemination**

16  
17  
18  
19 This is a national study that has been approved by the Hampstead NHS Health  
20 Research Authority Ethics Committee. Ethics approval number – 20/HRA/2320. The  
21 study is compliant with the requirements of General Data Protection Regulation  
22 (2016/679) and the Data Protection Act (2018). All investigators and study site staff will  
23 comply with the requirements of the General Data Protection Regulation (2016/679)  
24 with regards to the collection, storage, processing and disclosure of personal  
25 information, and will uphold the Act's core principles.  
26  
27  
28  
29  
30  
31  
32

33 We will provide opportunities for survey participants to comment on survey methodology  
34 at the first monthly survey and consider revisions based on this. We are also monitoring  
35 participant queries through our study email address and using these to refine  
36 methodology where necessary.  
37  
38  
39  
40  
41  
42

## 43 **Data sharing and access**

44  
45  
46 We aim to share aggregate data from this project on our website and via a “Findings so  
47 far” section on our website - <https://ucl-virus-watch.net/>. We will also be sharing  
48 individual record level data with personal identifiers removed on a research data sharing  
49 service such as the Office of National Statistics Secure Research Service.[12] In  
50 sharing the data we will work within the principles set out in the UKRI Guidance on best  
51 practice in the management of research data.[13] Access to use of the data whilst  
52 research is being conducted will be managed by the Chief Investigators (ACH and  
53  
54  
55  
56  
57  
58  
59  
60

1  
2  
3 RWA) in accordance with the principles set out in the UKRI guidance on best practice in  
4 the management of research data. It is the intention that the data arising from this  
5 research will initially be collected, cleaned and validated by the UCL research team and  
6 once this has been completed will be shared for wider use. We aim to make subsets of  
7 the data more rapidly available both on our study website and via the public facing  
8 dashboard during the ongoing phase of data collection. In line with Principle 5 of the  
9 UKRI guidance on best practice in the management of research data, we plan to  
10 release data in batches as they become available or as updated results are published.  
11 Individual record data linked using NHS Digital will not be shared, only aggregated  
12 results. HES and mortality data may be obtained from a third party and are not publicly  
13 available. These data are owned by a third party and can be accessed by researchers  
14 applying to the Health and Social Care Information Centre for England. We will put  
15 analysis code on publicly available repositories to enable their reuse.  
16  
17  
18  
19  
20  
21  
22  
23  
24  
25  
26  
27  
28

## 29 **Author Contributions**

30  
31 Roles: Conceptualization (AH, EF, JK, PH, EN, BK, IC, VL, RAMcK, TC, AMJ, SM, JG,  
32 RG, AR, RWA) Investigation, Methodology (All authors), Project Administration (AH, EF,  
33 JK, VN, SB, TB, AA, PH, LW, WLEF, CG, PP, MSh, AMDN, EN, MSp, RWA) , Writing –  
34 Original Draft Preparation (All Authors), Software (VN, TB, SB, RWA), Resources (AH,  
35 EF, JK, PH, EN, BK, IC, VL, RAMcK, TC, YL, AMJ, SM, JG, RG, AR, RWA), Writing –  
36 Review & Editing (All Authors).  
37  
38  
39  
40  
41  
42  
43

## 44 **Funding**

45  
46 The research costs for the study have been supported by the MRC Grant Ref: MC\_PC  
47 19070 awarded to UCL on 30 March 2020 and MRC Grant Ref: MR/V028375/1  
48 awarded on 17 August 2020. The study also received \$15,000 of Facebook advertising  
49 credit to support a pilot social media recruitment campaign on 18th August 2020.  
50  
51  
52  
53  
54  
55  
56  
57  
58  
59  
60



1  
2  
3 **Competing interests:** ACH serves on the UK New and Emerging Respiratory Virus  
4 Threats Advisory Group. AMJ was a Governor of Wellcome Trust from 2011-18 and is  
5 Chair of the Committee for Strategic Coordination for Health of the Public Research.  
6  
7  
8  
9

## 10 Figure legends

11  
12  
13  
14 *Figure 1. Overview of cohort recruitment, PCR swabbing schedules and data collection*  
15 *for the Virus Watch household community cohort study.*  
16  
17  
18  
19  
20  
21

## 22 References

- 23  
24  
25  
26  
27  
28 1 Official UK Coronavirus Dashboard. <https://coronavirus.data.gov.uk/> (accessed 30 Nov  
29 2020).
- 30  
31 2 Statistics. Statistics » COVID-19 Daily Deaths.  
32 <https://www.england.nhs.uk/statistics/statistical-work-areas/covid-19-daily-deaths/>  
33 (accessed 30 Nov 2020).
- 34  
35 3 Coronavirus (COVID-19).  
36 <https://www.ons.gov.uk/peoplepopulationandcommunity/healthandsocialcare/conditionsand>  
37 [diseases](https://www.ons.gov.uk/peoplepopulationandcommunity/healthandsocialcare/conditionsand) (accessed 30 Nov 2020).
- 38  
39 4 Fragaszy EB, Warren-Gash C, Wang L, *et al.* Cohort Profile: The Flu Watch Study. *Int J*  
40 *Epidemiol* 2017;**46**:e18. doi:10.1093/ije/dyv370
- 41  
42 5 Hayward AC, Fragaszy EB, Bermingham A, *et al.* Comparative community burden and  
43 severity of seasonal and pandemic influenza: results of the Flu Watch cohort study. *Lancet*  
44 *Respir Med* 2014;**2**:445–54. doi:10.1016/S2213-2600(14)70034-7
- 45  
46 6 Smith CM, Conolly A, Fuller C, *et al.* Symptom reporting, healthcare-seeking behaviour and  
47 antibiotic use for common infections: protocol for Bug Watch, a prospective community  
48 cohort study. *BMJ Open* 2019;**9**:e028676. doi:10.1136/bmjopen-2018-028676
- 49  
50 7 Clinical Research Network. [https://www.nihr.ac.uk/explore-nihr/support/clinical-research-](https://www.nihr.ac.uk/explore-nihr/support/clinical-research-network.htm)  
51 [network.htm](https://www.nihr.ac.uk/explore-nihr/support/clinical-research-network.htm) (accessed 30 Nov 2020).
- 52  
53 8 Harris PA, Taylor R, Thielke R, *et al.* Research electronic data capture (REDCap)--a  
54 metadata-driven methodology and workflow process for providing translational research  
55 informatics support. *J Biomed Inform* 2009;**42**:377–81. doi:10.1016/j.jbi.2008.08.010
- 56  
57 9 Clinical Research Network. <https://www.nihr.ac.uk/explore-nihr/support/clinical-research->  
58  
59

1  
2  
3 network.htm (accessed 30 Nov 2020).  
4

5 10 Wagner M, Lampos V, Cox IJ, *et al*. The added value of online user-generated content in  
6 traditional methods for influenza surveillance. *Sci Rep* 2018;**8**:13963. doi:10.1038/s41598-  
7 018-32029-6  
8

9 11 Lampos V, Majumder MS, Yom-Tov E, *et al*. Tracking COVID-19 using online search. arXiv  
10 [cs.SI]. 2020.<http://arxiv.org/abs/2003.08086v10>  
11

12 12 Accessing secure research data as an accredited researcher.  
13 <https://www.ons.gov.uk/aboutus/whatwedo/statistics/requestingstatistics/approvedresearcherscheme>  
14 (accessed 12 Mar 2021).  
15

16 13 UKRI. Guidance on best practice in the management of research data.  
17 [https://www.ukri.org/wp-content/uploads/2020/10/UKRI-020920-](https://www.ukri.org/wp-content/uploads/2020/10/UKRI-020920-GuidanceBestPracticeManagementResearchData.pdf)  
18 [GuidanceBestPracticeManagementResearchData.pdf](https://www.ukri.org/wp-content/uploads/2020/10/UKRI-020920-GuidanceBestPracticeManagementResearchData.pdf)  
19  
20  
21  
22  
23  
24  
25  
26  
27  
28  
29  
30  
31  
32  
33  
34  
35  
36  
37  
38  
39  
40  
41  
42  
43  
44  
45  
46  
47  
48  
49  
50  
51  
52  
53  
54  
55  
56  
57  
58  
59  
60

1  
2  
3  
4  
5  
6  
7  
8  
9  
10  
11  
12  
13  
14  
15  
16  
17  
18  
19  
20  
21  
22  
23  
24  
25  
26  
27  
28  
29  
30  
31  
32  
33  
34  
35  
36  
37  
38  
39  
40  
41  
42  
43  
44  
45  
46  
47  
48  
49  
50  
51  
52  
53  
54  
55  
56  
57  
58  
59  
60

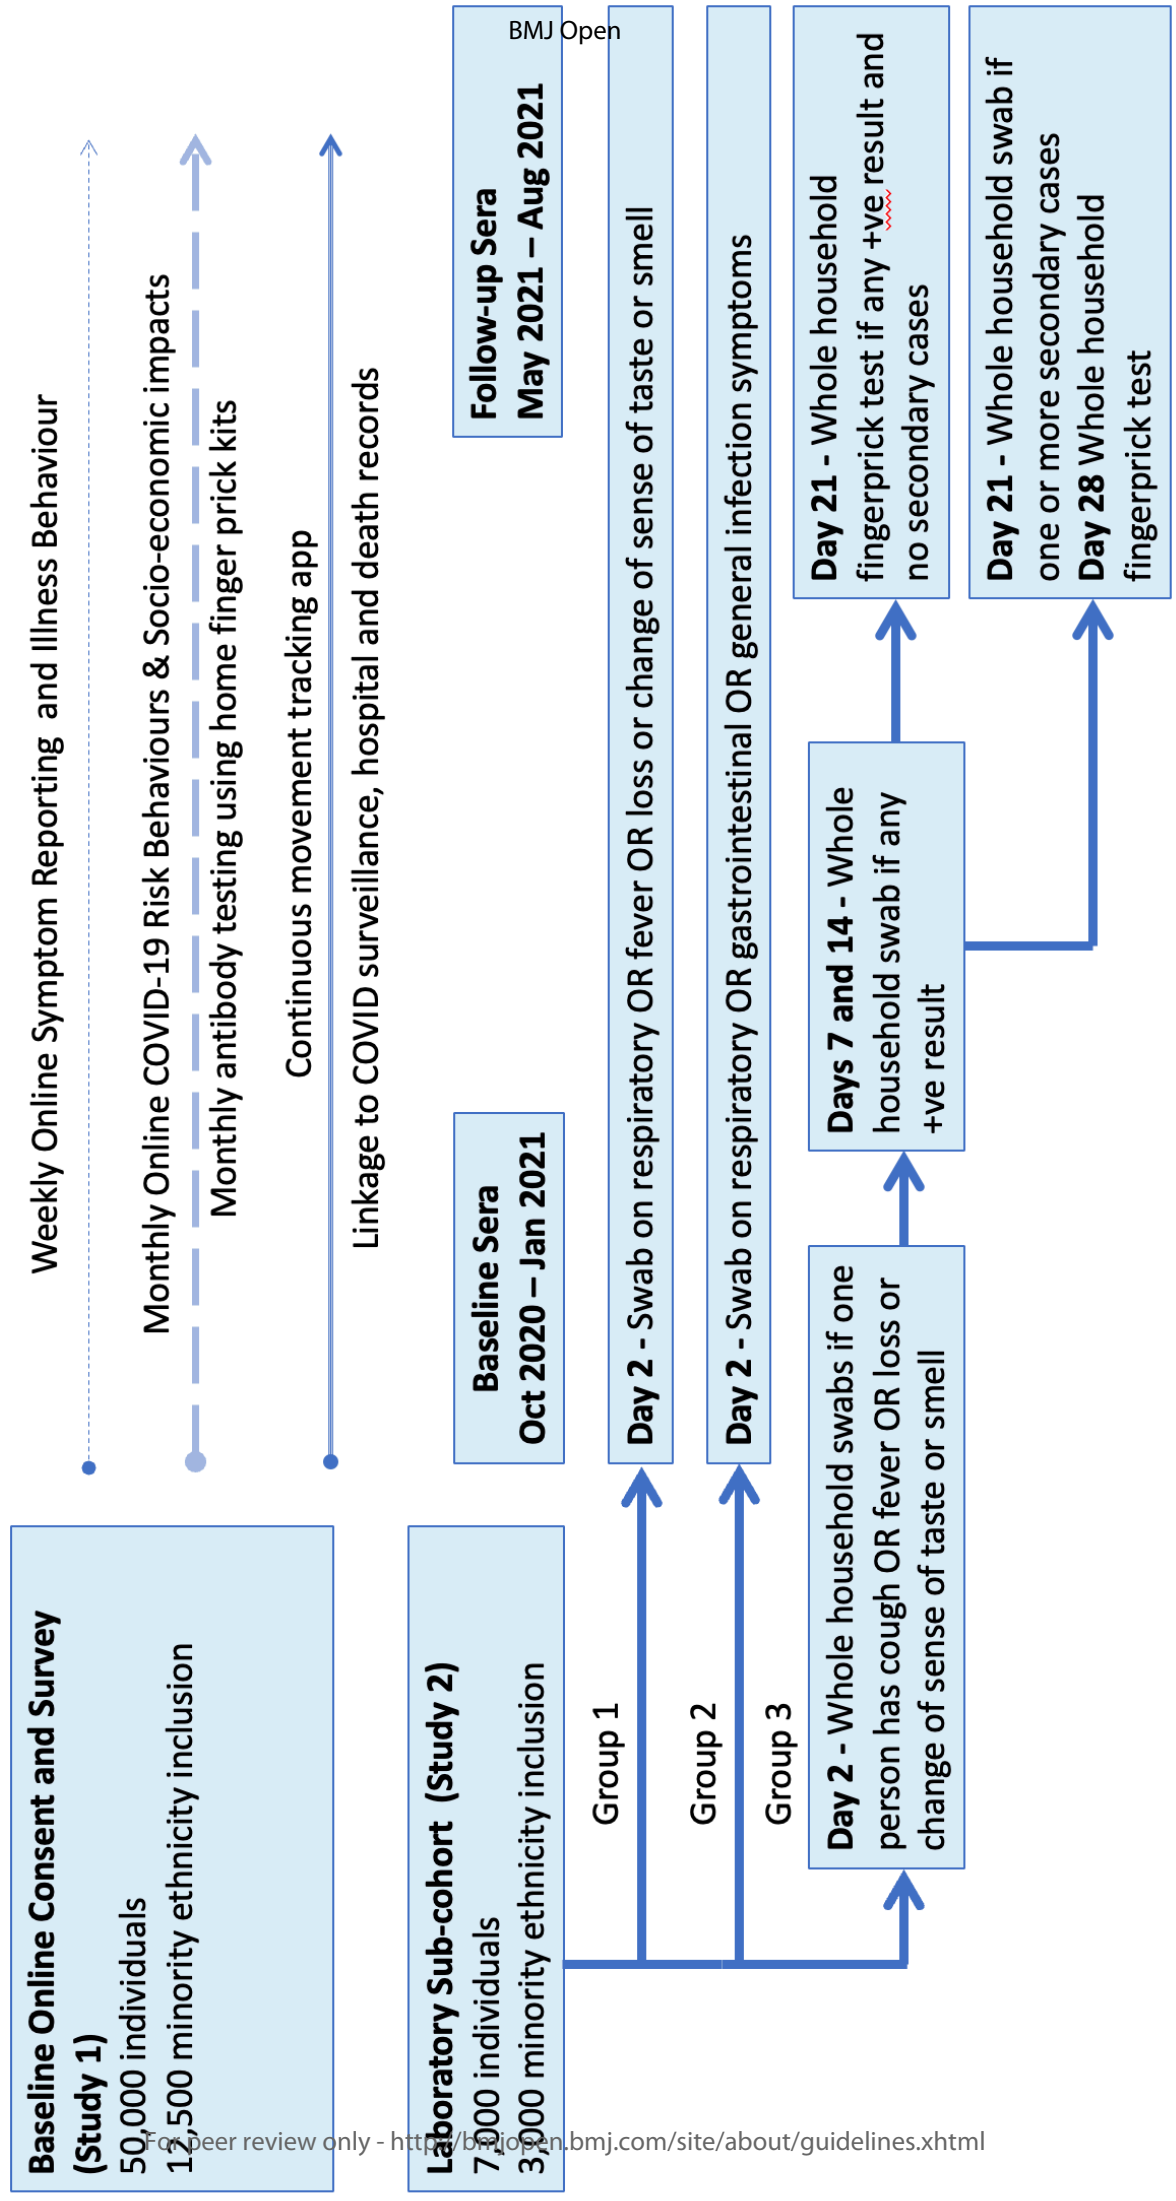

## Appendix 1 - Study inclusion and exclusion criteria:

### Inclusion:

- Households self-select into the study.
- Participants need to join as a household (all must take part).
- They need to have internet connection on a phone, tablet or computer, email and up until end of Feb 2021 at least one adult that can read English.
- From December 2020, online surveys will be translated into multiple languages.

### Exclusion Criteria

We will exclude participants if:

- Number of householders exceeds 6.
- Those without internet connection on a phone, tablet or computer, or an email address available to them as they will be unable to register
- There is no adult in the household who can read English (from March 2021 this will no longer be an exclusion criteria)
- A household is defined as one or more people (not necessarily related) whose usual residence (4days/week or more) is at the same address. These householders share cooking facilities, a living room or sitting room or dining area.

# Baseline for Lead Householder

1  
2  
3  
4  
5  
6  
7  
8  
9  
10  
11  
12  
13  
14  
15  
16  
17  
18  
19  
20  
21  
22  
23  
24  
25  
26  
27  
28  
29  
30  
31  
32  
33  
34  
35  
36  
37  
38  
39  
40  
41  
42  
43  
44  
45  
46  
47  
48  
49  
50  
51  
52  
53  
54  
55  
56  
57  
58  
59  
60

---

**Baseline Survey for [hh1\_fname] [hh1\_sname]**

---

alive

---

The baseline survey collects some basic information about each person participating in Virus Watch. We will ask about each household member in turn, please ask each adult to complete their own information and help children to complete their sections or complete them for them

---

[hh1\_fname] [hh1\_sname]: At birth you were described as?  Male  
 Female  
 Intersex  
 Prefer not to say

---

[hh1\_fname] [hh1\_sname]: Do you know your NHS Number?  Yes  
This can usually be found on an NHS letter  No

---

[hh1\_fname] [hh1\_sname]: What is your NHS Number?

---

[hh1\_fname] [hh1\_sname]: Where is your place of Birth?  United Kingdom  
 Other

---

[hh1\_fname] [hh1\_sname]: When did you first come to live in the UK (approximately)?  
DD/MM/YYYY

---

1 [hh1\_fname] [hh1\_sname]: Please specify where you were  
2 born:  
3

- 4  Afghanistan
- 5  Albania
- 6  Algeria
- 7  American Samoa
- 8  Andorra
- 9  Angola
- 10  Anguilla
- 11  Antarctica
- 12  Antigua And Barbuda
- 13  Argentina
- 14  Armenia
- 15  Aruba
- 16  Australia
- 17  Austria
- 18  Azerbaijan
- 19  Bahamas
- 20  Bahrain
- 21  Bangladesh
- 22  Barbados
- 23  Belarus
- 24  Belgium
- 25  Belize
- 26  Benin
- 27  Bermuda
- 28  Bhutan
- 29  Bolivia
- 30  Bosnia And Herzegovina
- 31  Botswana
- 32  Bouvet Island
- 33  Brazil
- 34  British Indian Ocean Territory
- 35  Brunei Darussalam
- 36  Bulgaria
- 37  Burkina Faso
- 38  Burundi
- 39  Cambodia
- 40  Cameroon
- 41  Canada
- 42  Cape Verde
- 43  Cayman Islands
- 44  Central African Republic
- 45  Chad
- 46  Chile
- 47  China
- 48  Christmas Island
- 49  Cocos (keeling) Islands
- 50  Colombia
- 51  Comoros
- 52  Congo
- 53  Congo, The Democratic Republic Of The
- 54  Cook Islands
- 55  Costa Rica
- 56  Cote D'ivoire
- 57  Croatia
- 58  Cuba
- 59  Cyprus
- 60  Czech Republic
- Denmark
- Djibouti
- Dominica
- Dominican Republic
- East Timor
- Ecuador
- Egypt
- El Salvador
- Equatorial Guinea
- Eritrea
- Estonia
- Ethiopia

- 1  Falkland Islands (malvinas)
- 2  Faroe Islands
- 3  Fiji
- 4  Finland
- 5  France
- 6  French Guiana
- 7  French Polynesia
- 8  French Southern Territories
- 9  Gabon
- 10  Gambia
- 11  Georgia
- 12  Germany
- 13  Ghana
- 14  Gibraltar
- 15  Greece
- 16  Greenland
- 17  Grenada
- 18  Guadeloupe
- 19  Guam
- 20  Guatemala
- 21  Guinea
- 22  Guinea-bissau
- 23  Guyana
- 24  Haiti
- 25  Heard Island And Mcdonald Islands
- 26  Holy See (vatican City State)
- 27  Honduras
- 28  Hong Kong
- 29  Hungary
- 30  Iceland
- 31  India
- 32  Indonesia
- 33  Iran, Islamic Republic Of
- 34  Iraq
- 35  Ireland
- 36  Israel
- 37  Italy (Italian Republic)
- 38  Jamaica
- 39  Japan
- 40  Jordan
- 41  Kazakstan
- 42  Kenya
- 43  Kiribati
- 44  Korea, Democratic People's Republic Of
- 45  Korea, Republic Of
- 46  Kosovo
- 47  Kuwait
- 48  Kyrgyzstan
- 49  Lao People's Democratic Republic
- 50  Latvia
- 51  Lebanon
- 52  Lesotho
- 53  Liberia
- 54  Libyan Arab Jamahiriya
- 55  Liechtenstein
- 56  Lithuania
- 57  Luxembourg
- 58  Macau
- 59  Macedonia, The Former Yugoslav Republic Of
- 60  Madagascar
- Malawi
- Malaysia
- Maldives
- Mali
- Malta
- Marshall Islands
- Martinique
- Mauritania
- Mauritius
- Mayotte
- Mexico

1  
2  
3  
4  
5  
6  
7  
8  
9  
10  
11  
12  
13  
14  
15  
16  
17  
18  
19  
20  
21  
22  
23  
24  
25  
26  
27  
28  
29  
30  
31  
32  
33  
34  
35  
36  
37  
38  
39  
40  
41  
42  
43  
44  
45  
46  
47  
48  
49  
50  
51  
52  
53  
54  
55  
56  
57  
58  
59  
60

- Micronesia, Federated States Of
- Moldova, Republic Of
- Monaco
- Mongolia
- Montserrat
- Montenegro
- Morocco
- Mozambique
- Myanmar
- Namibia
- Nauru
- Nepal
- Netherlands
- Netherlands Antilles
- New Caledonia
- New Zealand
- Nicaragua
- Niger
- Nigeria
- Niue
- Norfolk Island
- Northern Mariana Islands
- Norway
- Oman
- Pakistan
- Palau
- Palestinian Territory, Occupied
- Panama
- Papua New Guinea
- Paraguay
- Peru
- Philippines
- Pitcairn
- Poland
- Portugal
- Puerto Rico
- Qatar
- Reunion
- Romania
- Russian Federation
- Rwanda
- Saint Helena
- Saint Kitts And Nevis
- Saint Lucia
- Saint Pierre And Miquelon
- Saint Vincent And The Grenadines
- Samoa
- San Marino
- Sao Tome And Principe
- Saudi Arabia
- Senegal
- Serbia
- Seychelles
- Sierra Leone
- Singapore
- Slovakia
- Slovenia
- Solomon Islands
- Somalia
- South Africa
- South Georgia And The South Sandwich Islands
- Spain
- Sri Lanka
- Sudan
- Suriname
- Svalbard And Jan Mayen
- Swaziland
- Sweden
- Switzerland
- Syrian Arab Republic
- Taiwan, Province Of China



- Tajikistan  
 Tanzania, United Republic Of  
 Thailand  
 Togo  
 Tokelau  
 Tonga  
 Trinidad And Tobago  
 Tunisia  
 Turkey  
 Turkmenistan  
 Turks And Caicos Islands  
 Tuvalu  
 Uganda  
 Ukraine  
 United Arab Emirates  
 United Kingdom  
 United States  
 United States Minor Outlying Islands  
 Uruguay  
 Uzbekistan  
 Vanuatu  
 Venezuela  
 VietNam  
 Virgin Islands, British  
 Virgin Islands, U.s.  
 Wallis And Futuna  
 Western Sahara  
 Yemen  
 Zambia  
 Zimbabwe

[hh1\_fname] [hh1\_sname]: What is your ethnic group?

- White - English/ Welsh/ Scottish/ Northern Irish/ British  
 White - Irish  
 White - Gypsy or Irish Traveller  
 Any other white background (please describe)  
 Asian/ Asian British - Indian  
 Asian/ Asian British - Pakistani  
 Asian/ Asian British - Bangladeshi  
 Asian/ Asian British - Chinese  
 Any other Asian/ Asian British background (please describe)  
 Black African  
 Black Caribbean  
 Any other Black/ African/ Caribbean background (please describe)  
 Arab  
 Any other ethnic group (please describe)  
 Mixed/ multiple ethnic groups - White and Black Caribbean  
 Mixed/ multiple ethnic groups - White and Black African  
 Mixed/ multiple ethnic groups - White and Asian  
 Any other mixed/ multiple ethnic background (please describe)  
 Prefer not to say

[hh1\_fname] [hh1\_sname]: Please describe your ethnic group:

---

[hh1\_fname] [hh1\_sname]: Are you pregnant?

- Yes  
 No

1 What trimester of pregnancy are you in?  Less than 12 Weeks  
2  12 Weeks to 24 Weeks  
3  More than 24 weeks  
4

5 Contact details

6  
7  
8 [hh1\_fname] [hh1\_sname]: What is your mobile phone  
9 number? \_\_\_\_\_  
10 This is so we can call you to make blood taking  
11 appointments and send your test results if you are  
12 selected for the swabbing part of the study.  
13 If you do not have a mobile phone, please enter your  
14 landline phone number, and we will seek alternative  
15 arrangements to send your results if you are selected  
16 for the swabbing part of the study.

17  
18 Address Line 1:  
19 This is to send you swabs (if you are chosen by the  
20 study team to partake in the swabbing study) \_\_\_\_\_  
21

22 Address Line 2:  
23 \_\_\_\_\_  
24

25 Address Line 3:  
26 \_\_\_\_\_  
27

28  
29 Post Code:  
30 \_\_\_\_\_  
31  
32  
33  
34  
35  
36  
37  
38  
39  
40  
41  
42  
43  
44  
45  
46  
47  
48  
49  
50  
51  
52  
53  
54  
55  
56  
57  
58  
59  
60

**Medical Background for [hh1\_fname] [hh1\_sname]**

People's health can influence the severity of COVID illness, we want to find out more about this.

[hh1\_fname] [hh1\_sname]: Please provide your general practitioner's details:  
This will allow us to link to your information to hospital records more accurately.

Name of Surgery:

\_\_\_\_\_

Address Line 1:

\_\_\_\_\_

Address Line 2:

\_\_\_\_\_

Address Line 3:

\_\_\_\_\_

Post Code:

\_\_\_\_\_

[hh1\_fname] [hh1\_sname] : Has a doctor or other health professional ever told you that you have any of the following conditions?  
Please select all that apply.

- Asthma
- Arthritis
- Congestive heart failure
- Coronary heart disease
- Angina
- Heart attack or myocardial infarction
- Stroke
- Emphysema
- Chronic bronchitis
- COPD (Chronic Obstructive Pulmonary Disease)
- Cystic fibrosis
- Hypothyroidism or an under-active thyroid
- Any kind of liver condition
- Cancer or malignancy
- Insulin treated diabetes
- Other diabetes
- Epilepsy
- High blood pressure/hypertension
- An emotional, nervous or psychiatric problem
- Multiple Sclerosis
- HIV
- Chronic kidney disease
- Conditions affecting the brain and nerves, such as Parkinson's disease, motor neurone disease, multiple sclerosis (MS), a learning disability or cerebral palsy
- Problems with your spleen or you've had your spleen removed
- Sickle cell disease
- Other long standing/chronic condition
- None of these

[hh1\_fname] [hh1\_sname]: Please specify:

\_\_\_\_\_

1 [hh1\_fname] [hh1\_sname]: What type of cancer or  
2 malignancy was that?  
3 Please select all that apply

- Bowel/colorectal  
 Lung  
 Breast  
 Prostate  
 Liver  
 Skin cancer or melanoma  
 Blood or bone marrow cancer, such as leukaemia  
 Other

10 [hh1\_fname] [hh1\_sname]: What type of cancer or  
11 malignancy was that?  
12 Please select all that apply

- Bowel/colorectal  
 Lung  
 Breast  
 Liver  
 Skin cancer or melanoma  
 Blood or bone marrow cancer, such as leukaemia  
 Other

18 [hh1\_fname] [hh1\_sname]: Has a doctor or other health  
19 professional ever told you that you have any of these  
20 conditions?  
21 Please select all that apply

- Asthma  
 Cystic fibrosis  
 Insulin treated diabetes  
 Epilepsy  
 Conditions affecting the brain and nerves, such as  
Parkinson's disease, motor neurone disease,  
multiple sclerosis (MS), a learning disability or  
cerebral palsy  
 Sickle cell disease  
 Other long standing/chronic condition  
 None of these

30 [hh1\_fname] [hh1\_sname] : Have you received a letter  
31 from the NHS, saying that "the NHS has identified you  
32 as someone at risk of severe illness if you catch  
33 coronavirus, because you have an underlying disease or  
34 health condition that means if you catch the virus,  
35 you are more likely to be admitted to hospital than  
36 others"?

- Yes  
 No

38 [hh1\_fname] [hh1\_sname] : Do you know your height and  
39 weight?

- Yes  
 No

41 [hh1\_fname] [hh1\_sname]: Do you know your height in  
42 imperial (feet and inches) or metric (centimetres)?  
43 Please select the unit you prefer if you know both

- Imperial (Feet and Inches)  
 Metric (centimetres)

46 [hh1\_fname] [hh1\_sname]: What is your height in  
47 centimetres (cm)?  
48 Please enter digits only, e.g. '5' and not 'five'

\_\_\_\_\_

50 [hh1\_fname] [hh1\_sname]: How many feet tall are you  
51 (rounded down)?  
52 Please enter the feet component of your height. For  
53 example if you're 5 foot 4, please enter 5

\_\_\_\_\_

55 [hh1\_fname] [hh1\_sname]: How many inches tall are you  
56 above your feet value?  
57 Please enter the inches component of your height. For  
58 example if you're 5 foot 4, please enter 4

\_\_\_\_\_

[hh1\_fname] [hh1\_sname]: Do you know your weight in imperial (stone and pounds-lbs) or metric(kilograms)? Please select the unit you prefer if you know both

- Imperial (stone and pounds)
- Metric (kilograms)

[hh1\_fname] [hh1\_sname]: How much do you weigh in kilograms (kg)? Please enter digits only, e.g. '5' and not 'five'

[hh1\_fname] [hh1\_sname]: What is your weight in stone, rounded down? For example if you are 8 stone, 10 pounds, please enter 8. If you do not use stone, please feel free to leave this blank and enter your weight fully in pounds

[hh1\_fname] [hh1\_sname]: How much do you weight in pounds (lbs) (above your stone weight)? For example, if you are 8 stone, 10 pounds, please enter 10.If you did not enter a value for stone, please enter your weight fully in lbs here

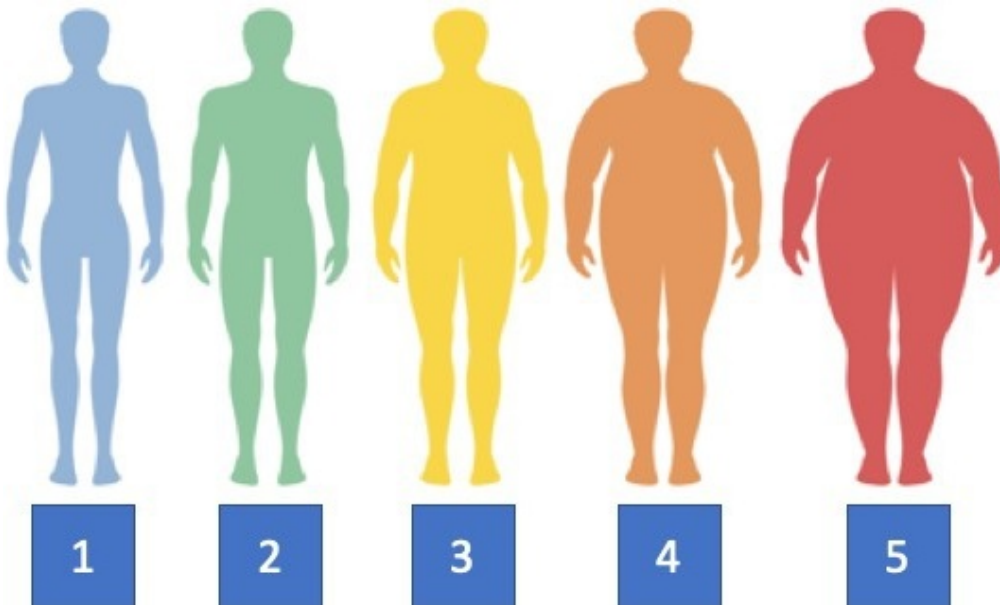

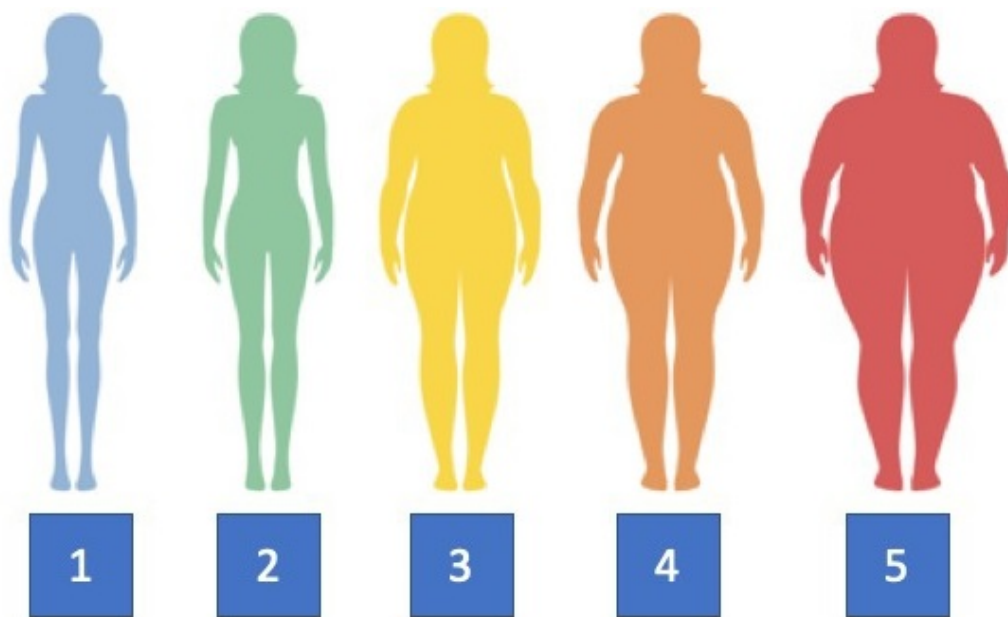

[hh1\_fname] [hh1\_sname]: Referring to the illustration above, which body shape best describes your body shape?

- 1
- 2
- 3
- 4
- 5

HairSex hormones that affect male pattern baldness may also affect COVID severity

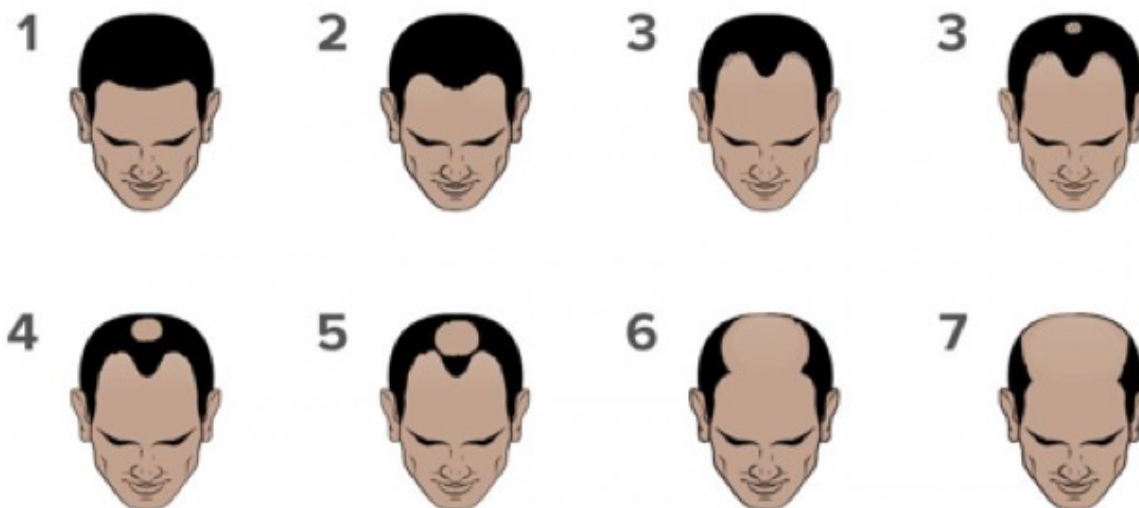

1 [hh1\_fname] [hh1\_sname]: Referring to the illustration  1  
2 above, please select a number from 1-7 that best  2  
3 describes your hair  3  
4  4  
5  5  
6  6  
7  7  
8

9 Medication Some medicines may affect your risk of getting respiratory infections and may either protect against  
10 severe diseases or possibly increase the risk. We want to find out more about this  
11

12 [hh1\_fname] [hh1\_sname] : Do you take any medication?  Yes  
13  No  
14

15 [hh1\_fname] [hh1\_sname]: Are you currently receiving  Medication following an organ transplant  
16 treatment or taking medications that may affect your  Medicines such as steroid tablets that weaken the  
17 immune system?  immune system  
18 Please select all that apply  Targeted therapy or chemotherapy for cancer  
19 treatment  Radiotherapy for cancer treatment  
20  Other treatment or medication that may affect  
21 immune system  None of these  
22  
23  
24  
25

26 [hh1\_fname] [hh1\_sname]: Do you regularly take  Ranitidine (e.g. Zantac)  
27 medicine to suppress gastric acid?  Omeprazole (e.g. Losec)  
28 Please select all that apply  Antacids (e.g. Rennies)  
29  None of these  
30

31 [hh1\_fname] [hh1\_sname]: Which of the following  Regularly taking Aspirin  
32 medicines do you take?  Regularly taking "NSAIDS" e.g. Ibuprofen, nurofen,  
33 Please select all that apply  diclofenic, naproxen.  Regularly taking blood pressure medicines ending  
34 in "-pril" such as enalapril, lisinopril,  
35 captopril, ramipril  Regularly taking blood pressure measurements  
36 ending in "-sartan" such as losartan, valsartan,  
37 irbesartan  Regularly taking anticoagulants e.g warfarin,  
38 ivaroxaban (Xarelto), dabigatran (Pradaxa),  
39 apixaban (Eliquis), edoxaban (Lixiana)  
40  Steroid tablets  
41  Regularly use a steroid inhaler  
42  Regularly take statins e.g. atorvastatin (Lipitor)  
43  None of these  
44  
45  
46

47 [hh1\_fname] [hh1\_sname]: Which of the following  Steroid tablets  
48 medicines do you take?  Regularly use a steroid inhaler  
49 Please select all that apply  
50

51 [hh1\_fname] [hh1\_sname]: Do you take any vitamin  Vitamin C Supplements  
52 supplements?  Vitamin D Supplements  
53 Please select all that apply  Other  
54  None  
55  
56

57 [hh1\_fname] [hh1\_sname]: Have you ever had a flu  Yes  
58 vaccine?  No  
59  
60

1 [hh1\_fname] [hh1\_sname]: Approximately when did you  
2 have your most recent flu vaccine? \_\_\_\_\_  
3 If you do not remember the exact date, please select  
4 an approximate date  
5

### 6 Drinking and Smoking

7 Drinking and smoking affects the risk of many diseases. We want to find out if it affects the risk of COVID-19 infection  
8

9  
10 [hh1\_fname] [hh1\_sname]: Have you ever smoked  Yes  
11 cigarettes regularly?  No  
12

13 [hh1\_fname] [hh1\_sname]: And do you smoke cigarettes  Yes  
14 at all nowadays?  No  
15

16 [hh1\_fname] [hh1\_sname]: How many cigarettes do you  
17 smoke daily? \_\_\_\_\_  
18 Please enter digits only, e.g. '5' and not 'five'  
19

20 [hh1\_fname] [hh1\_sname]: When did you give up smoking?  Less than 3 months ago  
21  3 - 6 months ago  
22  More than 6 months ago but less than 1 year ago  
23  1 year or more ago  
24  
25

26 [hh1\_fname] [hh1\_sname]: Thinking about the past  Daily  
27 month, how often did you have a drink containing  4-6 Times per week  
28 alcohol?  2-3 Times per week  
29  Weekly or Less  
30  2-4 times per month  
31  Never  
32

33 [hh1\_fname] [hh1\_sname]: How many drinks do you have  1-2 Drinks  
34 on a typical day when you are drinking?  3-4 Drinks  
35  5-6 Drinks  
36  7-9 Drinks  
37  10+  
38

### 39 Accessing Health care during the lockdown

40  
41 [hh1\_fname] [hh1\_sname]: Have you had any healthcare  Yes  
42 appointments cancelled, postponed or changed to a  No  
43 telephone or online (including video) consultation  
44 since the start of the pandemic?  
45  
46  
47  
48  
49  
50  
51  
52  
53  
54  
55  
56  
57  
58  
59  
60



1 Please tick all that applied  
2  
3  
4  
5  
6  
7  
8  
9  
10  
11  
12  
13  
14  
15  
16  
17  
18  
19  
20  
21  
22  
23  
24  
25  
26  
27  
28  
29  
30  
31  
32  
33  
34  
35  
36  
37  
38  
39  
40  
41  
42  
43  
44  
45  
46  
47  
48  
49  
50  
51  
52  
53  
54  
55  
56  
57  
58  
59  
60

- I had an operation cancelled or postponed
- I had a planned hospital admission cancelled or postponed
- I had a hospital outpatient appointment cancelled or postponed
- I had a hospital outpatient appointment changed to a phone call or online (including video) consultation
- I had a GP appointment cancelled or postponed
- I had a GP appointment changed to a phone call or online (including video) consultation
- I had another NHS appointment cancelled or postponed
- I had another NHS appointment changed to a phone call or online (including video)

For peer review only

**Employment status for [hh1\_fname] [hh1\_sname]**

Many people's work has been affected by the coronavirus and people's work can affect their chance of catching coronavirus. We'd like to know about your work and how it has been effected by the coronavirus.

[hh1\_fname] [hh1\_sname]: Thinking back to earlier this year, before the outbreak of the coronavirus pandemic. Which of these description best describes your work status?

- Employed full time
- Employed part time
- Self employed full time
- Self employed part time
- Retired
- Student
- Looking after house/family (not looking for work)
- Permanently sick or disabled
- Unemployed
- None of the above

[hh1\_fname] [hh1\_sname]: What is/was the name of your job?

\_\_\_\_\_

[hh1\_fname] [hh1\_sname]: Please describe what you do/did at work

\_\_\_\_\_

[hh1\_fname] [hh1\_sname]: Are you a health or social care worker?

- Yes
- No

What setting do you work in?

- Secondary Care
- Accident and emergency
- Primary Care
- Care home (residential or nursing)
- Community
- Other (specify)

Other (Please Specify)

\_\_\_\_\_

[hh1\_fname] [hh1\_sname]: Please select your healthcare profession

- Doctor
- Nurse
- Profession allied to medicine (e.g. occupational therapy, physiotherapy, podiatry )
- Psychological Professions
- Pharmacy
- Midwifery
- Healthcare science (e.g. laboratory, radiology)
- Management
- Porter
- Cleaner
- Administrative Staff with regular patient contact
- Administrative Staff with minimal or no patient contact
- Care Worker
- Personal Assistant
- Social Worker
- Community support and outreach worker
- Other

[hh1\_fname] [hh1\_sname]: Please specify

\_\_\_\_\_

[hh1\_fname] [hh1\_sname]: What was your last job when you were working? \_\_\_\_\_

[hh1\_fname] [hh1\_sname]: Are you a healthcare student?  Yes  
e.g. medical student, student nurse  No

Employment during the pandemic

[hh1\_fname] [hh1\_sname]: BEFORE THE PANDEMIC, how many hours of paid work did you work per week? \_\_\_\_\_  
Please enter digits only, e.g. '5' and not 'five'

[hh1\_fname] [hh1\_sname]: SINCE THE PANDEMIC, during the months of March, April, May, how many hours of paid work have you worked since each week? \_\_\_\_\_  
Please enter digits only, e.g. '5' and not 'five'

It looks like you have reduced your paid work during the lockdown.

[hh1\_fname] [hh1\_sname] : Why have you had to reduce the number of hours?  Laid off by employer with certain recall date  
 Laid off or made redundant by employer with some prospect of recall  
 Employer cut hours  
 Have been put on furlough or paid leave  
 Using annual leave  
 On paid or statutory sick leave  
 On unpaid sick leave  
 Caring for children or others  
 Other reasons

[hh1\_fname] [hh1\_sname] : Why have you had to reduce the number of hours?  My business has been directly affected by regulations on opening or other new regulations  
 My business has been directly affected by limited supplies that I need for my business  
 My business has been directly affected by reduced demand for my services or products  
 Illness  
 Self-isolating  
 Caring for children or others  
 Other reasons

[hh1\_fname] [hh1\_sname]: Have you received a written letter from your employer informing you that you have been furloughed under the Coronavirus Job Retention scheme?  Yes  
 No

Working from home during the pandemic

[hh1\_fname] [hh1\_sname]: How often did you WORK FROM HOME during the following three time periods:

|                                         | (Nearly) Always       | Often                 | Sometimes             | (Almost) Never        |
|-----------------------------------------|-----------------------|-----------------------|-----------------------|-----------------------|
| Before the lockdown (before March 2020) | <input type="radio"/> | <input type="radio"/> | <input type="radio"/> | <input type="radio"/> |

- 1 During the main lockdown (Mid  
2 March to Mid May) when we  
3 were asked to stay at Home,  
4 Save Lives, Support the NHS  
5  
6 After the easing of restrictions in  
7 mid-May, when we were  
8 encouraged to go back to work if  
9 we could not work from home  
10 (Stay Alert, Control the Virus,  
11 Save Lives)  
12  
13  
14

15 [hh1\_fname] [hh1\_sname]: How do/did you usually travel to work?  
16 Please choose one or more to represent a typical day

|                                                      | Before the lockdown (before<br>March 2020) | During the main lockdown<br>(Mid March to Mid May) when<br>we were asked to stay at<br>Home, Save Lives, Support<br>the NHS | After the easing of<br>restrictions in mid-May, when<br>we were encouraged to go<br>back to work if we could not<br>work from home (Stay Alert,<br>Control the Virus, Save Lives) |
|------------------------------------------------------|--------------------------------------------|-----------------------------------------------------------------------------------------------------------------------------|-----------------------------------------------------------------------------------------------------------------------------------------------------------------------------------|
| 26 By car or van                                     | <input type="checkbox"/>                   | <input type="checkbox"/>                                                                                                    | <input type="checkbox"/>                                                                                                                                                          |
| 27 Motorcycle, moped or scooter                      | <input type="checkbox"/>                   | <input type="checkbox"/>                                                                                                    | <input type="checkbox"/>                                                                                                                                                          |
| 29 Taxi or minicab                                   | <input type="checkbox"/>                   | <input type="checkbox"/>                                                                                                    | <input type="checkbox"/>                                                                                                                                                          |
| 30 Train                                             | <input type="checkbox"/>                   | <input type="checkbox"/>                                                                                                    | <input type="checkbox"/>                                                                                                                                                          |
| 32 Underground                                       | <input type="checkbox"/>                   | <input type="checkbox"/>                                                                                                    | <input type="checkbox"/>                                                                                                                                                          |
| 33 Bus                                               | <input type="checkbox"/>                   | <input type="checkbox"/>                                                                                                    | <input type="checkbox"/>                                                                                                                                                          |
| 34 Tram or light railway                             | <input type="checkbox"/>                   | <input type="checkbox"/>                                                                                                    | <input type="checkbox"/>                                                                                                                                                          |
| 36 Cycle                                             | <input type="checkbox"/>                   | <input type="checkbox"/>                                                                                                    | <input type="checkbox"/>                                                                                                                                                          |
| 37 Walk                                              | <input type="checkbox"/>                   | <input type="checkbox"/>                                                                                                    | <input type="checkbox"/>                                                                                                                                                          |
| 39 Other                                             | <input type="checkbox"/>                   | <input type="checkbox"/>                                                                                                    | <input type="checkbox"/>                                                                                                                                                          |
| 40 I did not travel to work during<br>41 this period | <input type="checkbox"/>                   | <input type="checkbox"/>                                                                                                    | <input type="checkbox"/>                                                                                                                                                          |

44 [hh1\_fname] [hh1\_sname]: BEFORE LOCKDOWN, how long did  
45 it take to get to work each day?  
46 Please provide the time for a one-way journey in  
47 minutes or enter 0 if you did not travel to work in  
48 this period

50 [hh1\_fname] [hh1\_sname]: DURING LOCKDOWN, how long did  
51 it take to get to work each day?  
52 Please provide the time for a one-way journey in  
53 minutes or enter 0 if you did not travel to work in  
54 this period

1 [hh1\_fname] [hh1\_sname]: AFTER THE EASING OF  
2 RESTRICTIONS, how long did it take to get to work each  
3 day? \_\_\_\_\_  
4 Please provide the time for a one-way journey in  
5 minutes or enter 0 if you did not travel to work in  
6 this period  
7  
8  
9  
10  
11  
12  
13  
14  
15  
16  
17  
18  
19  
20  
21  
22  
23  
24  
25  
26  
27  
28  
29  
30  
31  
32  
33  
34  
35  
36  
37  
38  
39  
40  
41  
42  
43  
44  
45  
46  
47  
48  
49  
50  
51  
52  
53  
54  
55  
56  
57  
58  
59  
60

For peer review only

**Finances details for [hh1\_fname] [hh1\_sname]**

Many people have been affected financially by the coronavirus. We'd like to know how you have been affected and how you and your household are coping.

[hh1\_fname] [hh1\_sname]: What is your combined household income last year?  
We want to understand how COVID-19 impacts households with different levels of income

- 0-9,999
- 10,000- 24,999
- 25,000 - 49,999
- 50,000 - 74,999
- 75,000 - 99,999
- 100,000 - 124,999
- 125,000 - 149,999
- 150,000 - 174,999
- 175,000 - 199,999
- 200,000 or more
- Prefer not to say

[hh1\_fname] [hh1\_sname] : BEFORE THE PANDEMIC, how would you say you were managing financially? Would you say you were:

- Living comfortably
- Doing alright
- Just about getting by
- Finding it quite difficult
- Finding it very difficult

[hh1\_fname] [hh1\_sname]: How would you say you are managing financially now? Would you say you were:

- Living comfortably
- Doing alright
- Just about getting by
- Finding it quite difficult
- Finding it very difficult

[hh1\_fname] [hh1\_sname]: BEFORE THE PANDEMIC, have you ever needed to use a food bank?

- Never
- Less than once a week
- Once a week or more

[hh1\_fname] [hh1\_sname]: SINCE THE PANDEMIC, have you needed to use a food bank?

- Never
- Less than once a week
- Once a week or more

1 **Caring information during the lockdown - [hh1\_fname] [hh1\_sname]**

2  
3 [hh1\_fname] [hh1\_sname]: About how many hours a week  
4 did you spend on childcare or home-schooling during  
5 the lockdown? \_\_\_\_\_  
6 Please enter digits only, e.g. '5' and not 'five'

7  
8 [hh1\_fname] [hh1\_sname]: Who is mainly responsible for  
9 looking after the children or home schooling?

- 10  Mainly you
- 11  Mainly your husband/wife/partner
- 12  Jointly with your husband/wife/partner
- 13  Someone else

14  
15  
16  
17  
18  
19  
20  
21  
22  
23  
24  
25  
26  
27  
28  
29  
30  
31  
32  
33  
34  
35  
36  
37  
38  
39  
40  
41  
42  
43  
44  
45  
46  
47  
48  
49  
50  
51  
52  
53  
54  
55  
56  
57  
58  
59  
60

For peer review only

**Previous COVID-19 like illness for [hh1\_fname] [hh1\_sname]**

[hh1\_fname] [hh1\_sname]: Have you EVER come into contact with anyone that was known or presumed to have COVID-19?  
Close contact includes:  
Physical contact with another personA five minute conversation with someone less than 2 metres awayBeing less than 2 metres away from someone for 15 minutes or more, even if you didn't talk to each otherPlease select all that apply.

- No  
 Yes (a household member)  
 Yes (at work)  
 Yes (a non-household friend or relation)  
 Yes (in public)  
 Yes (other)  
 Don't know

Did this person have COVID confirmed by a laboratory test?

- Yes  
 No  
 Don't know

[hh1\_fname] [hh1\_sname]: Have you had an illness involving Cough, or Fever, or Loss of sense of smell since the 1st of January 2020?

- Yes  
 No

[hh1\_fname] [hh1\_sname]: Which month did the illness start and which symptoms did you have?  
If you had more than one illness, you may select multiple start months

|                        | Jan 2020                 | Feb 2020                 | Mar 2020                 | Apr 2020                 | May 2020                 | Jun 2020                 | Jul 2020                 | Aug 2020                 | Sep 2020                 | Oct 2020                 | Nov 2020                 | Dec 2020                 | Jan 2021                 | Feb 2021                 |
|------------------------|--------------------------|--------------------------|--------------------------|--------------------------|--------------------------|--------------------------|--------------------------|--------------------------|--------------------------|--------------------------|--------------------------|--------------------------|--------------------------|--------------------------|
| Cough                  | <input type="checkbox"/> | <input type="checkbox"/> | <input type="checkbox"/> | <input type="checkbox"/> | <input type="checkbox"/> | <input type="checkbox"/> | <input type="checkbox"/> | <input type="checkbox"/> | <input type="checkbox"/> | <input type="checkbox"/> | <input type="checkbox"/> | <input type="checkbox"/> | <input type="checkbox"/> | <input type="checkbox"/> |
| Fever                  | <input type="checkbox"/> | <input type="checkbox"/> | <input type="checkbox"/> | <input type="checkbox"/> | <input type="checkbox"/> | <input type="checkbox"/> | <input type="checkbox"/> | <input type="checkbox"/> | <input type="checkbox"/> | <input type="checkbox"/> | <input type="checkbox"/> | <input type="checkbox"/> | <input type="checkbox"/> | <input type="checkbox"/> |
| Loss of sense of smell | <input type="checkbox"/> | <input type="checkbox"/> | <input type="checkbox"/> | <input type="checkbox"/> | <input type="checkbox"/> | <input type="checkbox"/> | <input type="checkbox"/> | <input type="checkbox"/> | <input type="checkbox"/> | <input type="checkbox"/> | <input type="checkbox"/> | <input type="checkbox"/> | <input type="checkbox"/> | <input type="checkbox"/> |

[hh1\_fname] [hh1\_sname]: COVID-19 can cause a wide range of symptoms. Have you had an illness that you think might have been COVID-19, or which was confirmed as COVID-19?

- Yes  
 No

Please describe in your own words how did the illness started and what you did when you started to feel ill?

Please describe in your own words, what symptoms developed and what did you do?

Please describe in your own words, how long did your symptoms last and are any symptoms still there?

[hh1\_fname] [hh1\_sname]: Have you ever had a nose or throat swab test for COVID-19?

- Yes  
 No  
 Not Sure

What month was the swab taken and what was the result?  
Please select all the months in which you took each test (if you took multiple) and their results



|    |          | The test was positive | The test was negative | The test was unclear  | I haven't had the result |
|----|----------|-----------------------|-----------------------|-----------------------|--------------------------|
| 1  | Jan 2020 | <input type="radio"/> | <input type="radio"/> | <input type="radio"/> | <input type="radio"/>    |
| 2  | Feb 2020 | <input type="radio"/> | <input type="radio"/> | <input type="radio"/> | <input type="radio"/>    |
| 3  |          |                       |                       |                       |                          |
| 4  | Mar 2020 | <input type="radio"/> | <input type="radio"/> | <input type="radio"/> | <input type="radio"/>    |
| 5  | Apr 2020 | <input type="radio"/> | <input type="radio"/> | <input type="radio"/> | <input type="radio"/>    |
| 6  |          |                       |                       |                       |                          |
| 7  | May 2020 | <input type="radio"/> | <input type="radio"/> | <input type="radio"/> | <input type="radio"/>    |
| 8  | Jun 2020 | <input type="radio"/> | <input type="radio"/> | <input type="radio"/> | <input type="radio"/>    |
| 9  |          |                       |                       |                       |                          |
| 10 | Jul 2020 | <input type="radio"/> | <input type="radio"/> | <input type="radio"/> | <input type="radio"/>    |
| 11 | Aug 2020 | <input type="radio"/> | <input type="radio"/> | <input type="radio"/> | <input type="radio"/>    |
| 12 | Sep 2020 | <input type="radio"/> | <input type="radio"/> | <input type="radio"/> | <input type="radio"/>    |
| 13 |          |                       |                       |                       |                          |
| 14 | Oct 2020 | <input type="radio"/> | <input type="radio"/> | <input type="radio"/> | <input type="radio"/>    |
| 15 | Nov 2020 | <input type="radio"/> | <input type="radio"/> | <input type="radio"/> | <input type="radio"/>    |
| 16 |          |                       |                       |                       |                          |
| 17 | Dec 2020 | <input type="radio"/> | <input type="radio"/> | <input type="radio"/> | <input type="radio"/>    |
| 18 | Jan 2021 | <input type="radio"/> | <input type="radio"/> | <input type="radio"/> | <input type="radio"/>    |
| 19 | Feb 2021 | <input type="radio"/> | <input type="radio"/> | <input type="radio"/> | <input type="radio"/>    |
| 20 |          |                       |                       |                       |                          |
| 21 |          |                       |                       |                       |                          |
| 22 |          |                       |                       |                       |                          |
| 23 |          |                       |                       |                       |                          |
| 24 |          |                       |                       |                       |                          |
| 25 |          |                       |                       |                       |                          |
| 26 |          |                       |                       |                       |                          |
| 27 |          |                       |                       |                       |                          |
| 28 |          |                       |                       |                       |                          |
| 29 |          |                       |                       |                       |                          |
| 30 |          |                       |                       |                       |                          |
| 31 |          |                       |                       |                       |                          |
| 32 |          |                       |                       |                       |                          |
| 33 |          |                       |                       |                       |                          |
| 34 |          |                       |                       |                       |                          |
| 35 |          |                       |                       |                       |                          |
| 36 |          |                       |                       |                       |                          |
| 37 |          |                       |                       |                       |                          |
| 38 |          |                       |                       |                       |                          |
| 39 |          |                       |                       |                       |                          |
| 40 |          |                       |                       |                       |                          |
| 41 |          |                       |                       |                       |                          |
| 42 |          |                       |                       |                       |                          |
| 43 |          |                       |                       |                       |                          |
| 44 |          |                       |                       |                       |                          |
| 45 |          |                       |                       |                       |                          |
| 46 |          |                       |                       |                       |                          |
| 47 |          |                       |                       |                       |                          |
| 48 |          |                       |                       |                       |                          |
| 49 |          |                       |                       |                       |                          |
| 50 |          |                       |                       |                       |                          |
| 51 |          |                       |                       |                       |                          |
| 52 |          |                       |                       |                       |                          |
| 53 |          |                       |                       |                       |                          |
| 54 |          |                       |                       |                       |                          |
| 55 |          |                       |                       |                       |                          |
| 56 |          |                       |                       |                       |                          |
| 57 |          |                       |                       |                       |                          |
| 58 |          |                       |                       |                       |                          |
| 59 |          |                       |                       |                       |                          |
| 60 |          |                       |                       |                       |                          |

For peer review only

1 **Thank You**

2  
3 We want to know what questions you think are important so we can try to answer them with the help of tens of  
4 thousands of Virus Watch participants. Each month we will ask our participants to say what questions they would  
5 like to see answered.

6  
7 [hh1\_fname] [hh1\_sname]: What questions would you like  
8 Virus Watch to answer?  
9 \_\_\_\_\_  
10

11 As we come out of a very difficult and tragic period we want to know about your three main worries related to  
12 COVID-19 and the COVID-19 response.

13  
14 [hh1\_fname] [hh1\_sname]: What are your three main worries about the COVID-19 pandemic?

15  
16 1st most worrying aspect:  
17 \_\_\_\_\_  
18

19  
20 2nd most worrying aspect:  
21 \_\_\_\_\_  
22

23 3rd most worrying aspect:  
24 \_\_\_\_\_  
25

26 Please click submit to continue

27  
28  
29  
30  
31  
32  
33  
34  
35  
36  
37  
38  
39  
40  
41  
42  
43  
44  
45  
46  
47  
48  
49  
50  
51  
52  
53  
54  
55  
56  
57  
58  
59  
60

For peer review only

# Weekly Survey

## Welcome to the weekly followup survey

surveydate

---

In Virus Watch we are interested in the following types of symptoms:

General symptoms (e.g. fevers, general muscle aches, headache, joint pain, extreme tiredness, trouble with daily activities around the house) Respiratory Symptoms (e.g. cough, shortness of breath, earache, sore throat, runny nose, blocked nose, sneezing, wheeze, loss or altered senses of smell or taste). Eyes (e.g. eye redness, eye pain, sticky eye, deterioration of eyesight) Rashes Digestive symptoms (e.g. diarrhoea or loose stools, vomiting, nausea, abdominal pain) This survey is about symptoms in the week (Monday to Sunday) before you received the email with the survey link.

---

Download Symptom Diary

[Attachment: "Virus\_Watch\_Symptom\_Diary.pdf"]

---

Have you or anyone in the household had any of these symptoms in the past week?  Yes  No

Please continue to report weekly symptoms even if you believe them to be related to a recent vaccine you have had.

---

Did any household members receive a COVID-19 test result in the past week?  Yes  No

Has anyone in the household been advised to self-isolate in the past week?  Yes  No

---

Please indicate who received a result for a COVID-19 (swab or lateral flow) test in the past week: If you have had multiple tests this week please report any positive test dates OR your last negative test dates (if all were negative)

---

[go\_arm\_1][hh1\_fname] [go\_arm\_1][hh1\_sname]

---

[go\_arm\_1][hh1\_fname] [go\_arm\_1][hh1\_sname]: What was the result of the COVID-19 test?  Positive  Negative  Unclear

---

[go\_arm\_1][hh1\_fname] [go\_arm\_1][hh1\_sname]: When was the test taken? \_\_\_\_\_

---

[go\_arm\_1][hh1\_fname] [go\_arm\_1][hh1\_sname]: When did you receive the test result? \_\_\_\_\_

---

[go\_arm\_1][hh2\_fname] [go\_arm\_1][hh2\_sname]

---

[go\_arm\_1][hh2\_fname] [go\_arm\_1][hh2\_sname]: What was the result of the COVID-19 test?  Positive  Negative  Unclear

---

[go\_arm\_1][hh2\_fname] [go\_arm\_1][hh2\_sname]: When was the test taken? \_\_\_\_\_

---

1 [go\_arm\_1][hh2\_fname] [go\_arm\_1][hh2\_sname]: When did  
2 you receive the test result? \_\_\_\_\_  
3

---

4 [go\_arm\_1][hh3\_fname] [go\_arm\_1][hh3\_sname]   
5  
6

---

7 [go\_arm\_1][hh3\_fname] [go\_arm\_1][hh3\_sname]: What was  
8 the result of the COVID-19 test?  Positive  
9  Negative  
10  Unclear

---

11 [go\_arm\_1][hh3\_fname] [go\_arm\_1][hh3\_sname]: When was  
12 the test taken? \_\_\_\_\_  
13

---

14 [go\_arm\_1][hh3\_fname] [go\_arm\_1][hh3\_sname]: When did  
15 you receive the test result? \_\_\_\_\_  
16

---

17 [go\_arm\_1][hh4\_fname] [go\_arm\_1][hh4\_sname]   
18  
19

---

20 [go\_arm\_1][hh4\_fname] [go\_arm\_1][hh4\_sname]: What was  
21 the result of the COVID-19 test?  Positive  
22  Negative  
23  Unclear

---

24 [go\_arm\_1][hh4\_fname] [go\_arm\_1][hh4\_sname]: When was  
25 the test taken? \_\_\_\_\_  
26

---

27 [go\_arm\_1][hh4\_fname] [go\_arm\_1][hh4\_sname]: When did  
28 you receive the test result? \_\_\_\_\_  
29

---

30 [go\_arm\_1][hh5\_fname] [go\_arm\_1][hh5\_sname]   
31  
32

---

33 [go\_arm\_1][hh5\_fname] [go\_arm\_1][hh5\_sname]: What was  
34 the result of the COVID-19 test?  Positive  
35  Negative  
36  Unclear

---

37 [go\_arm\_1][hh5\_fname] [go\_arm\_1][hh5\_sname]: When was  
38 the test taken? \_\_\_\_\_  
39

---

40 [go\_arm\_1][hh5\_fname] [go\_arm\_1][hh5\_sname]: When did  
41 you receive the test result? \_\_\_\_\_  
42

---

43 [go\_arm\_1][hh6\_fname] [go\_arm\_1][hh6\_sname]   
44  
45

---

46 [go\_arm\_1][hh6\_fname] [go\_arm\_1][hh6\_sname]: What was  
47 the result of the COVID-19 test?  Positive  
48  Negative  
49  Unclear

---

50 [go\_arm\_1][hh6\_fname] [go\_arm\_1][hh6\_sname]: When was  
51 the test taken? \_\_\_\_\_  
52

---

53 [go\_arm\_1][hh6\_fname] [go\_arm\_1][hh6\_sname]: When did  
54 you receive the test result? \_\_\_\_\_  
55

---

56  
57 Please indicate who was advised to self isolate in the past week:  
58

---

59 [go\_arm\_1][hh1\_fname] [go\_arm\_1][hh1\_sname]   
60

1 [go\_arm\_1][hh1\_fname] [go\_arm\_1][hh1\_sname]: Which of  
2 the following led to the request to self-isolate?  
3

- The Test and Trace programme advised me to self-isolate because I have symptoms of COVID-19
- The Test and Trace programme advised me to self-isolate because I am had a positive test result
- The Test and Trace programme advised me to self isolate because I was in contact with a COVID-19 case
- The NHS COVID-19 app alerted me that I had been in contact with a COVID-19 case
- I have returned from a country where quarantine is advised after return.
- Other reason

15 [go\_arm\_1][hh2\_fname] [go\_arm\_1][hh2\_sname]

17 [go\_arm\_1][hh2\_fname] [go\_arm\_1][hh2\_sname]: Which of  
18 the following led to the request to self-isolate?  
19

- The Test and Trace programme advised me to self-isolate because I have symptoms of COVID-19
- The Test and Trace programme advised me to self-isolate because I am had a positive test result
- The Test and Trace programme advised me to self isolate because I was in contact with a COVID-19 case
- The NHS COVID-19 app alerted me that I had been in contact with a COVID-19 case
- I have returned from a country where quarantine is advised after return.
- Other reason

31 [go\_arm\_1][hh3\_fname] [go\_arm\_1][hh3\_sname]

33 [go\_arm\_1][hh3\_fname] [go\_arm\_1][hh3\_sname]: Which of  
34 the following led to the request to self-isolate?  
35

- The Test and Trace programme advised me to self-isolate because I have symptoms of COVID-19
- The Test and Trace programme advised me to self-isolate because I am had a positive test result
- The Test and Trace programme advised me to self isolate because I was in contact with a COVID-19 case
- The NHS COVID-19 app alerted me that I had been in contact with a COVID-19 case
- I have returned from a country where quarantine is advised after return.
- Other reason

47 [go\_arm\_1][hh4\_fname] [go\_arm\_1][hh4\_sname]

1 [go\_arm\_1][hh4\_fname] [go\_arm\_1][hh4\_sname]: Which of  
2 the following led to the request to self-isolate?  
3

- 4  
5  
6  
7  
8  
9  
10  
11  
12  
13  
14
- The Test and Trace programme advised me to self-isolate because I have symptoms of COVID-19
  - The Test and Trace programme advised me to self-isolate because I am had a positive test result
  - The Test and Trace programme advised me to self isolate because I was in contact with a COVID-19 case
  - The NHS COVID-19 app alerted me that I had been in contact with a COVID-19 case
  - I have returned from a country where quarantine is advised after return.
  - Other reason

15 [go\_arm\_1][hh5\_fname] [go\_arm\_1][hh5\_sname]

17 [go\_arm\_1][hh5\_fname] [go\_arm\_1][hh5\_sname]: Which of  
18 the following led to the request to self-isolate?  
19

- 20  
21  
22  
23  
24  
25  
26  
27  
28  
29  
30
- The Test and Trace programme advised me to self-isolate because I have symptoms of COVID-19
  - The Test and Trace programme advised me to self-isolate because I am had a positive test result
  - The Test and Trace programme advised me to self isolate because I was in contact with a COVID-19 case
  - The NHS COVID-19 app alerted me that I had been in contact with a COVID-19 case
  - I have returned from a country where quarantine is advised after return.
  - Other reason

31 [go\_arm\_1][hh6\_fname] [go\_arm\_1][hh6\_sname]

33 [go\_arm\_1][hh6\_fname] [go\_arm\_1][hh6\_sname]: Which of  
34 the following led to the request to self-isolate?  
35

- 36  
37  
38  
39  
40  
41  
42  
43  
44  
45  
46
- The Test and Trace programme advised me to self-isolate because I have symptoms of COVID-19
  - The Test and Trace programme advised me to self-isolate because I am had a positive test result
  - The Test and Trace programme advised me to self isolate because I was in contact with a COVID-19 case
  - The NHS COVID-19 app alerted me that I had been in contact with a COVID-19 case
  - I have returned from a country where quarantine is advised after return.
  - Other reason

47 Please indicate who has had symptoms in the past week:  
48

49 [go\_arm\_1][hh1\_fname] [go\_arm\_1][hh1\_sname]:  
50

- 51  
52  
53  
54  
55  
56  
57  
58  
59  
60
- Yes, symptoms that have been present for less than 2 months
  - Yes, symptoms that developed after a COVID-19 like illness and have lasted for more than 2 months
  - Yes, symptoms that are part of a long term chronic illness
  - No symptoms

1 [go\_arm\_1][hh2\_fname] [go\_arm\_1][hh2\_sname]:  Yes, symptoms that have been present for less than  
2 2 months  
3  Yes, symptoms that developed after a COVID-19 like  
4 illness and have lasted for more than 2 months  
5  Yes, symptoms that are part of a long term chronic  
6 illness  
7  No symptoms

9 [go\_arm\_1][hh3\_fname] [go\_arm\_1][hh3\_sname]:  Yes, symptoms that have been present for less than  
10 2 months  
11  Yes, symptoms that developed after a COVID-19 like  
12 illness and have lasted for more than 2 months  
13  Yes, symptoms that are part of a long term chronic  
14 illness  
15  No symptoms

17 [go\_arm\_1][hh4\_fname] [go\_arm\_1][hh4\_sname]:  Yes, symptoms that have been present for less than  
18 2 months  
19  Yes, symptoms that developed after a COVID-19 like  
20 illness and have lasted for more than 2 months  
21  Yes, symptoms that are part of a long term chronic  
22 illness  
23  No symptoms

25 [go\_arm\_1][hh5\_fname] [go\_arm\_1][hh5\_sname]:  Yes, symptoms that have been present for less than  
26 2 months  
27  Yes, symptoms that developed after a COVID-19 like  
28 illness and have lasted for more than 2 months  
29  Yes, symptoms that are part of a long term chronic  
30 illness  
31  No symptoms

33 [go\_arm\_1][hh6\_fname] [go\_arm\_1][hh6\_sname]:  Yes, symptoms that have been present for less than  
34 2 months  
35  Yes, symptoms that developed after a COVID-19 like  
36 illness and have lasted for more than 2 months  
37  Yes, symptoms that are part of a long term chronic  
38 illness  
39  No symptoms

41 Please indicate whether the following members have received a result for a COVID-19 (swab or lateral flow) test in  
42 the past week: If you have had multiple tests this week please report any positive test dates OR your last negative  
43 test dates (if all were negative)

45 [go\_arm\_1][hh1\_fname] [go\_arm\_1][hh1\_sname]:

48 [go\_arm\_1][hh1\_fname] [go\_arm\_1][hh1\_sname]: What was  
49 the result of this test?  Positive  
50  Negative  
51  Unclear

52 [go\_arm\_1][hh1\_fname] [go\_arm\_1][hh1\_sname]: When was  
53 the test taken? \_\_\_\_\_

56 [go\_arm\_1][hh1\_fname] [go\_arm\_1][hh1\_sname]: When did  
57 you receive the test result? \_\_\_\_\_

59 [go\_arm\_1][hh2\_fname] [go\_arm\_1][hh2\_sname]:

|    |                                                       |                                |
|----|-------------------------------------------------------|--------------------------------|
| 1  | [go_arm_1][hh2_fname] [go_arm_1][hh2_sname]: What was | <input type="radio"/> Positive |
| 2  | the result of this test?                              | <input type="radio"/> Negative |
| 3  |                                                       | <input type="radio"/> Unclear  |
| 4  |                                                       |                                |
| 5  | [go_arm_1][hh2_fname] [go_arm_1][hh2_sname]: When was |                                |
| 6  | the test taken?                                       | _____                          |
| 7  |                                                       |                                |
| 8  |                                                       |                                |
| 9  | [go_arm_1][hh2_fname] [go_arm_1][hh2_sname]: When did |                                |
| 10 | you receive the test result?                          | _____                          |
| 11 |                                                       |                                |
| 12 | [go_arm_1][hh3_fname] [go_arm_1][hh3_sname]:          | <input type="checkbox"/>       |
| 13 |                                                       |                                |
| 14 | [go_arm_1][hh3_fname] [go_arm_1][hh3_sname]: What was | <input type="radio"/> Positive |
| 15 | the result of this test?                              | <input type="radio"/> Negative |
| 16 |                                                       | <input type="radio"/> Unclear  |
| 17 |                                                       |                                |
| 18 |                                                       |                                |
| 19 | [go_arm_1][hh3_fname] [go_arm_1][hh3_sname]: When was |                                |
| 20 | the test taken?                                       | _____                          |
| 21 |                                                       |                                |
| 22 | [go_arm_1][hh3_fname] [go_arm_1][hh3_sname]: When did |                                |
| 23 | you receive the test result?                          | _____                          |
| 24 |                                                       |                                |
| 25 | [go_arm_1][hh4_fname] [go_arm_1][hh4_sname]:          | <input type="checkbox"/>       |
| 26 |                                                       |                                |
| 27 |                                                       |                                |
| 28 | [go_arm_1][hh4_fname] [go_arm_1][hh4_sname]: What was | <input type="radio"/> Positive |
| 29 | the result of this test?                              | <input type="radio"/> Negative |
| 30 |                                                       | <input type="radio"/> Unclear  |
| 31 |                                                       |                                |
| 32 | [go_arm_1][hh4_fname] [go_arm_1][hh4_sname]: When was |                                |
| 33 | the test taken?                                       | _____                          |
| 34 |                                                       |                                |
| 35 | [go_arm_1][hh4_fname] [go_arm_1][hh4_sname]: When did |                                |
| 36 | you receive the test result?                          | _____                          |
| 37 |                                                       |                                |
| 38 |                                                       |                                |
| 39 | [go_arm_1][hh5_fname] [go_arm_1][hh5_sname]:          | <input type="checkbox"/>       |
| 40 |                                                       |                                |
| 41 | [go_arm_1][hh5_fname] [go_arm_1][hh5_sname]: What was | <input type="radio"/> Positive |
| 42 | the result of this test?                              | <input type="radio"/> Negative |
| 43 |                                                       | <input type="radio"/> Unclear  |
| 44 |                                                       |                                |
| 45 | [go_arm_1][hh5_fname] [go_arm_1][hh5_sname]: When was |                                |
| 46 | the test taken?                                       | _____                          |
| 47 |                                                       |                                |
| 48 |                                                       |                                |
| 49 | [go_arm_1][hh5_fname] [go_arm_1][hh5_sname]: When did |                                |
| 50 | you receive the test result?                          | _____                          |
| 51 |                                                       |                                |
| 52 | [go_arm_1][hh6_fname] [go_arm_1][hh6_sname]:          | <input type="checkbox"/>       |
| 53 |                                                       |                                |
| 54 | [go_arm_1][hh6_fname] [go_arm_1][hh6_sname]: What was | <input type="radio"/> Positive |
| 55 | the result of this test?                              | <input type="radio"/> Negative |
| 56 |                                                       | <input type="radio"/> Unclear  |
| 57 |                                                       |                                |
| 58 |                                                       |                                |
| 59 | [go_arm_1][hh6_fname] [go_arm_1][hh6_sname]: When was |                                |
| 60 | the test taken?                                       | _____                          |



1 [go\_arm\_1][hh6\_fname] [go\_arm\_1][hh6\_sname]: When did  
2 you receive the test result?  
3

4 Please indicate whether the following household members been advised to self-isolate in the past week:  
5

6  
7 [go\_arm\_1][hh1\_fname] [go\_arm\_1][hh1\_sname]   
8

9 [go\_arm\_1][hh1\_fname] [go\_arm\_1][hh1\_sname]: Which of  
10 the following led to the request to self-isolate?  
11

- 12  The Test and Trace programme advised me to self-isolate because I have symptoms of COVID-19
- 13  The Test and Trace programme advised me to self-isolate because I am had a positive test result
- 14  The Test and Trace programme advised me to self-isolate because I was in contact with a COVID-19 case
- 15  The NHS COVID-19 app alerted me that I had been in contact with a COVID-19 case
- 16  I have returned from a country where quarantine is advised after return.
- 17  Other reason

18  
19  
20  
21  
22  
23 [go\_arm\_1][hh2\_fname] [go\_arm\_1][hh2\_sname]   
24

25 [go\_arm\_1][hh2\_fname] [go\_arm\_1][hh2\_sname]: Which of  
26 the following led to the request to self-isolate?  
27

- 28  The Test and Trace programme advised me to self-isolate because I have symptoms of COVID-19
- 29  The Test and Trace programme advised me to self-isolate because I am had a positive test result
- 30  The Test and Trace programme advised me to self-isolate because I was in contact with a COVID-19 case
- 31  The NHS COVID-19 app alerted me that I had been in contact with a COVID-19 case
- 32  I have returned from a country where quarantine is advised after return.
- 33  Other reason

34  
35  
36  
37  
38  
39 [go\_arm\_1][hh3\_fname] [go\_arm\_1][hh3\_sname]   
40

41 [go\_arm\_1][hh3\_fname] [go\_arm\_1][hh3\_sname]: Which of  
42 the following led to the request to self-isolate?  
43

- 44  The Test and Trace programme advised me to self-isolate because I have symptoms of COVID-19
- 45  The Test and Trace programme advised me to self-isolate because I am had a positive test result
- 46  The Test and Trace programme advised me to self-isolate because I was in contact with a COVID-19 case
- 47  The NHS COVID-19 app alerted me that I had been in contact with a COVID-19 case
- 48  I have returned from a country where quarantine is advised after return.
- 49  Other reason

50  
51  
52  
53  
54  
55 [go\_arm\_1][hh4\_fname] [go\_arm\_1][hh4\_sname]   
56  
57  
58  
59  
60

1 [go\_arm\_1][hh4\_fname] [go\_arm\_1][hh4\_sname]: Which of  
2 the following led to the request to self-isolate?  
3

- 4  
5  
6  
7  
8  
9  
10  
11  
12  
13  
14
- The Test and Trace programme advised me to self-isolate because I have symptoms of COVID-19
  - The Test and Trace programme advised me to self-isolate because I am had a positive test result
  - The Test and Trace programme advised me to self isolate because I was in contact with a COVID-19 case
  - The NHS COVID-19 app alerted me that I had been in contact with a COVID-19 case
  - I have returned from a country where quarantine is advised after return.
  - Other reason

15 [go\_arm\_1][hh5\_fname] [go\_arm\_1][hh5\_sname]

17 [go\_arm\_1][hh5\_fname] [go\_arm\_1][hh5\_sname]: Which of  
18 the following led to the request to self-isolate?  
19

- 20  
21  
22  
23  
24  
25  
26  
27  
28  
29  
30
- The Test and Trace programme advised me to self-isolate because I have symptoms of COVID-19
  - The Test and Trace programme advised me to self-isolate because I am had a positive test result
  - The Test and Trace programme advised me to self isolate because I was in contact with a COVID-19 case
  - The NHS COVID-19 app alerted me that I had been in contact with a COVID-19 case
  - I have returned from a country where quarantine is advised after return.
  - Other reason

31 [go\_arm\_1][hh6\_fname] [go\_arm\_1][hh6\_sname]

33 [go\_arm\_1][hh6\_fname] [go\_arm\_1][hh6\_sname]: Which of  
34 the following led to the request to self-isolate?  
35

- 36  
37  
38  
39  
40  
41  
42  
43  
44  
45  
46  
47  
48  
49  
50  
51  
52  
53  
54  
55  
56  
57  
58  
59  
60
- The Test and Trace programme advised me to self-isolate because I have symptoms of COVID-19
  - The Test and Trace programme advised me to self-isolate because I am had a positive test result
  - The Test and Trace programme advised me to self isolate because I was in contact with a COVID-19 case
  - The NHS COVID-19 app alerted me that I had been in contact with a COVID-19 case
  - I have returned from a country where quarantine is advised after return.
  - Other reason

**Vaccination**

Has anyone in the household received a COVID-19 vaccine in the past week?  Yes  
 No  
 Unsure (e.g. as part of a blinded COVID-19 trial)

Please indicate who received a COVID-19 vaccine:

[go\_arm\_1][hh1\_fname] [go\_arm\_1][hh1\_sname]

[go\_arm\_1][hh1\_fname] [go\_arm\_1][hh1\_sname]: Please select which dose(s) of the COVID-19 vaccine you received?  1st Dose  
 2nd Dose

[go\_arm\_1][hh1\_fname] [go\_arm\_1][hh1\_sname]: Which type of vaccine did you receive as the 1st dose?  Pfizer Biontech vaccine  
 Oxford AstraZeneca vaccine  
 Other vaccine  
 Don't know/Don't remember

[go\_arm\_1][hh1\_fname] [go\_arm\_1][hh1\_sname]: What date did you receive the 1st dose? (dd-mm-yyyy) \_\_\_\_\_

Please provide an estimate if you cannot recall the date

[go\_arm\_1][hh1\_fname] [go\_arm\_1][hh1\_sname]: Which type of vaccine did you receive as the 2nd dose?  Pfizer Biontech vaccine  
 Oxford AstraZeneca vaccine  
 Other vaccine  
 Don't know/Don't remember

[go\_arm\_1][hh1\_fname] [go\_arm\_1][hh1\_sname]: What date did you receive the 2nd dose? (dd-mm-yyyy) \_\_\_\_\_

Please provide an estimate if you cannot recall the date

[go\_arm\_1][hh2\_fname] [go\_arm\_1][hh2\_sname]

[go\_arm\_1][hh2\_fname] [go\_arm\_1][hh2\_sname]: Please select which dose(s) of the COVID-19 vaccine you received?  1st Dose  
 2nd Dose

[go\_arm\_1][hh2\_fname] [go\_arm\_1][hh2\_sname]: Which type of vaccine did you receive as the 1st dose?  Pfizer Biontech vaccine  
 Oxford AstraZeneca vaccine  
 Other vaccine  
 Don't know/Don't remember

[go\_arm\_1][hh2\_fname] [go\_arm\_1][hh2\_sname]: What date did you receive the 1st dose? (dd-mm-yyyy) \_\_\_\_\_

Please provide an estimate if you cannot recall the date

1 [go\_arm\_1][hh2\_fname] [go\_arm\_1][hh2\_sname]: Which  
2 type of vaccine did you receive as the 2nd dose?  
3  
4  
5

Pfizer Biontech vaccine  
 Oxford AstraZeneca vaccine  
 Other vaccine  
 Don't know/Don't remember

6 [go\_arm\_1][hh2\_fname] [go\_arm\_1][hh2\_sname]: What date  
7 did you receive the 2nd dose? (dd-mm-yyyy)  
8 \_\_\_\_\_

9 Please provide an estimate if you cannot recall the  
10 date  
11

12 [go\_arm\_1][hh3\_fname] [go\_arm\_1][hh3\_sname]

13 [go\_arm\_1][hh3\_fname] [go\_arm\_1][hh3\_sname]: Please  
14 select which dose(s) of the COVID-19 vaccine you  
15 received?  
16  
17

1st Dose  
 2nd Dose

18 [go\_arm\_1][hh3\_fname] [go\_arm\_1][hh3\_sname]: Which  
19 type of vaccine did you receive as the 1st dose?  
20  
21  
22  
23

Pfizer Biontech vaccine  
 Oxford AstraZeneca vaccine  
 Other vaccine  
 Don't know/Don't remember

24 [go\_arm\_1][hh3\_fname] [go\_arm\_1][hh3\_sname]: What date  
25 did you receive the 1st dose? (dd-mm-yyyy)  
26 \_\_\_\_\_

27 Please provide an estimate if you cannot recall the  
28 date  
29

30 [go\_arm\_1][hh3\_fname] [go\_arm\_1][hh3\_sname]: Which  
31 type of vaccine did you receive as the 2nd dose?  
32  
33  
34

Pfizer Biontech vaccine  
 Oxford AstraZeneca vaccine  
 Other vaccine  
 Don't know/Don't remember

35 [go\_arm\_1][hh3\_fname] [go\_arm\_1][hh3\_sname]: What date  
36 did you receive the 2nd dose? (dd-mm-yyyy)  
37 \_\_\_\_\_

38 Please provide an estimate if you cannot recall the  
39 date  
40

41 [go\_arm\_1][hh4\_fname] [go\_arm\_1][hh4\_sname]

42 [go\_arm\_1][hh4\_fname] [go\_arm\_1][hh4\_sname]: Please  
43 select which dose(s) of the COVID-19 vaccine you  
44 received?  
45  
46

1st Dose  
 2nd Dose

47 [go\_arm\_1][hh4\_fname] [go\_arm\_1][hh4\_sname]: Which  
48 type of vaccine did you receive as the 1st dose?  
49  
50  
51  
52

Pfizer Biontech vaccine  
 Oxford AstraZeneca vaccine  
 Other vaccine  
 Don't know/Don't remember

53 [go\_arm\_1][hh4\_fname] [go\_arm\_1][hh4\_sname]: What date  
54 did you receive the 1st dose? (dd-mm-yyyy)  
55 \_\_\_\_\_

56 Please provide an estimate if you cannot recall the  
57 date  
58  
59  
60

1 [go\_arm\_1][hh4\_fname] [go\_arm\_1][hh4\_sname]: Which  Pfizer Biontech vaccine  
2 type of vaccine did you receive as the 2nd dose?  Oxford AstraZeneca vaccine  
3  Other vaccine  
4  Don't know/Don't remember  
5

6 [go\_arm\_1][hh4\_fname] [go\_arm\_1][hh4\_sname]: What date  
7 did you receive the 2nd dose? (dd-mm-yyyy) \_\_\_\_\_  
8

9 Please provide an estimate if you cannot recall the  
10 date  
11

12 [go\_arm\_1][hh5\_fname] [go\_arm\_1][hh5\_sname]

13 [go\_arm\_1][hh5\_fname] [go\_arm\_1][hh5\_sname]: Please  1st Dose  
14 select which dose(s) of the COVID-19 vaccine you  2nd Dose  
15 received?  
16  
17

18 [go\_arm\_1][hh5\_fname] [go\_arm\_1][hh5\_sname]: Which  Pfizer Biontech vaccine  
19 type of vaccine did you receive as the 1st dose?  Oxford AstraZeneca vaccine  
20  Other vaccine  
21  Don't know/Don't remember  
22  
23

24 [go\_arm\_1][hh5\_fname] [go\_arm\_1][hh5\_sname]: What date  
25 did you receive the 1st dose? (dd-mm-yyyy) \_\_\_\_\_  
26

27 Please provide an estimate if you cannot recall the  
28 date  
29

30 [go\_arm\_1][hh5\_fname] [go\_arm\_1][hh5\_sname]: Which  Pfizer Biontech vaccine  
31 type of vaccine did you receive as the 2nd dose?  Oxford AstraZeneca vaccine  
32  Other vaccine  
33  Don't know/Don't remember  
34

35 [go\_arm\_1][hh5\_fname] [go\_arm\_1][hh5\_sname]: What date  
36 did you receive the 2nd dose? (dd-mm-yyyy) \_\_\_\_\_  
37

38 Please provide an estimate if you cannot recall the  
39 date  
40

41 [go\_arm\_1][hh6\_fname] [go\_arm\_1][hh6\_sname]

42 [go\_arm\_1][hh6\_fname] [go\_arm\_1][hh6\_sname]: Please  1st Dose  
43 select which dose(s) of the COVID-19 vaccine you  2nd Dose  
44 received?  
45  
46

47 [go\_arm\_1][hh6\_fname] [go\_arm\_1][hh6\_sname]: Which  Pfizer Biontech vaccine  
48 type of vaccine did you receive as the 1st dose?  Oxford AstraZeneca vaccine  
49  Other vaccine  
50  Don't know/Don't remember  
51  
52

53 [go\_arm\_1][hh6\_fname] [go\_arm\_1][hh6\_sname]: What date  
54 did you receive the 1st dose? (dd-mm-yyyy) \_\_\_\_\_  
55

56 Please provide an estimate if you cannot recall the  
57 date  
58  
59  
60

1 [go\_arm\_1][hh6\_fname] [go\_arm\_1][hh6\_sname]: Which  
2 type of vaccine did you receive as the 2nd dose?

- Pfizer Biontech vaccine  
 Oxford AstraZeneca vaccine  
 Other vaccine  
 Don't know/Don't remember

6 [go\_arm\_1][hh6\_fname] [go\_arm\_1][hh6\_sname]: What date  
7 did you receive the 2nd dose? (dd-mm-yyyy)  
8 \_\_\_\_\_

9 Please provide an estimate if you cannot recall the  
10 date  
11

12  
13 Thank you for letting us know that someone in your household has been ill. We hope they feel better soon. Please  
14 always follow NHS and Public Health advice when someone is ill. We will always have a link to the latest COVID-19  
15 advice on the Virus Watch Website.

16 If anyone has new symptoms to report, the following survey will ask about any illness and related health care as well  
17 as asking about isolation, time off work, measures to help stop infections spreading and activities that household  
18 members have done in the last week.  
19

20 The survey usually takes about 10 minutes to complete for each member of the household who has been ill.  
21

22 Thank you for completing the survey - we will be in touch again next week.  
23  
24  
25  
26  
27  
28  
29  
30  
31  
32  
33  
34  
35  
36  
37  
38  
39  
40  
41  
42  
43  
44  
45  
46  
47  
48  
49  
50  
51  
52  
53  
54  
55  
56  
57  
58  
59  
60

# Wkhh1

1  
2  
3  
4  
5  
6  
7  
8  
9  
10  
11  
12  
13  
14  
15  
16  
17  
18  
19  
20  
21  
22  
23  
24  
25  
26  
27  
28  
29  
30  
31  
32  
33  
34  
35  
36  
37  
38  
39  
40  
41  
42  
43  
44  
45  
46  
47  
48  
49  
50  
51  
52  
53  
54  
55  
56  
57  
58  
59  
60

## Symptoms - [go\_arm\_1][hh1\_fname] [go\_arm\_1][hh1\_sname]

The following sections are about the symptoms, use of treatments and access of medical services in the past week (the Monday-Sunday before you received the email with this survey link).

[go\_arm\_1][hh1\_fname]: What parts of the body did your symptoms affect?  
Select all that apply

- General symptoms (fevers, general muscle aches, headache, joint pain, extreme tiredness, trouble with daily activities around the house)
- Respiratory Symptoms (e.g. cough, shortness of breath, earache, sore throat, runny nose, blocked nose, sneezing, wheeze, loss or altered senses of smell or taste)
- Eyes (e.g. eye redness, eye pain, sticky eye, deterioration of eyesight)
- Rash
- Digestive symptoms (e.g. diarrhoea or loose stools, vomiting, nausea, abdominal pain)

[go\_arm\_1][hh1\_fname] [go\_arm\_1][hh1\_sname]: Which days did you have symptoms?  
Please check all days that you had any of the above symptoms.

- Monday
- Tuesday
- Wednesday
- Thursday
- Friday
- Saturday
- Sunday

For peer review only

**General symptoms - [go\_arm\_1][hh1\_fname] [go\_arm\_1][hh1\_sname]**

[go\_arm\_1][hh1\_fname] [go\_arm\_1][hh1\_sname]: Which of these general symptoms did you have?  
Select all that apply

- Fever  
 Feeling Feverish  
 Chills and shakes  
 Night Sweats  
 Muscle Aches  
 Bone or Joint Aches  
 Loss of Appetite  
 Headache  
 Lack of concentration  
 Lightheaded or dizzy  
 Not sleeping  
 Fatigue / Feeling unusually tired  
 Difficulty with daily activities around the house  
 Needed extra time in bed  
 Could not get out of bed  
 Confusion, disorientation, or hallucinations (altered mental state)  
 None of these symptoms

Please identify how severe your symptoms were

## Fever

|           | Less than 37.8 C<br>(100.0 F) | 37.8-38.9 C<br>(100-102 F) | 39-39.9 C<br>(102-103.9 F) | 40 C (104 F) or<br>more | Did not take<br>temperature<br>Don't remember |
|-----------|-------------------------------|----------------------------|----------------------------|-------------------------|-----------------------------------------------|
| Monday    | <input type="radio"/>         | <input type="radio"/>      | <input type="radio"/>      | <input type="radio"/>   | <input type="radio"/>                         |
| Tuesday   | <input type="radio"/>         | <input type="radio"/>      | <input type="radio"/>      | <input type="radio"/>   | <input type="radio"/>                         |
| Wednesday | <input type="radio"/>         | <input type="radio"/>      | <input type="radio"/>      | <input type="radio"/>   | <input type="radio"/>                         |
| Thursday  | <input type="radio"/>         | <input type="radio"/>      | <input type="radio"/>      | <input type="radio"/>   | <input type="radio"/>                         |
| Friday    | <input type="radio"/>         | <input type="radio"/>      | <input type="radio"/>      | <input type="radio"/>   | <input type="radio"/>                         |
| Saturday  | <input type="radio"/>         | <input type="radio"/>      | <input type="radio"/>      | <input type="radio"/>   | <input type="radio"/>                         |
| Sunday    | <input type="radio"/>         | <input type="radio"/>      | <input type="radio"/>      | <input type="radio"/>   | <input type="radio"/>                         |

## Feeling Feverish

|           | None                  | Mild                  | Moderate              | Severe                |
|-----------|-----------------------|-----------------------|-----------------------|-----------------------|
| Monday    | <input type="radio"/> | <input type="radio"/> | <input type="radio"/> | <input type="radio"/> |
| Tuesday   | <input type="radio"/> | <input type="radio"/> | <input type="radio"/> | <input type="radio"/> |
| Wednesday | <input type="radio"/> | <input type="radio"/> | <input type="radio"/> | <input type="radio"/> |
| Thursday  | <input type="radio"/> | <input type="radio"/> | <input type="radio"/> | <input type="radio"/> |
| Friday    | <input type="radio"/> | <input type="radio"/> | <input type="radio"/> | <input type="radio"/> |
| Saturday  | <input type="radio"/> | <input type="radio"/> | <input type="radio"/> | <input type="radio"/> |
| Sunday    | <input type="radio"/> | <input type="radio"/> | <input type="radio"/> | <input type="radio"/> |

## Chills and Shakes



|   |           | None                  | Mild                  | Moderate              | Severe                |
|---|-----------|-----------------------|-----------------------|-----------------------|-----------------------|
| 1 | Monday    | <input type="radio"/> | <input type="radio"/> | <input type="radio"/> | <input type="radio"/> |
| 2 | Tuesday   | <input type="radio"/> | <input type="radio"/> | <input type="radio"/> | <input type="radio"/> |
| 3 | Wednesday | <input type="radio"/> | <input type="radio"/> | <input type="radio"/> | <input type="radio"/> |
| 4 | Thursday  | <input type="radio"/> | <input type="radio"/> | <input type="radio"/> | <input type="radio"/> |
| 5 | Friday    | <input type="radio"/> | <input type="radio"/> | <input type="radio"/> | <input type="radio"/> |
| 6 | Saturday  | <input type="radio"/> | <input type="radio"/> | <input type="radio"/> | <input type="radio"/> |
| 7 | Sunday    | <input type="radio"/> | <input type="radio"/> | <input type="radio"/> | <input type="radio"/> |

12 Night Sweats

|    |           | None                  | Mild                  | Moderate              | Severe                |
|----|-----------|-----------------------|-----------------------|-----------------------|-----------------------|
| 15 | Monday    | <input type="radio"/> | <input type="radio"/> | <input type="radio"/> | <input type="radio"/> |
| 16 | Tuesday   | <input type="radio"/> | <input type="radio"/> | <input type="radio"/> | <input type="radio"/> |
| 17 | Wednesday | <input type="radio"/> | <input type="radio"/> | <input type="radio"/> | <input type="radio"/> |
| 18 | Thursday  | <input type="radio"/> | <input type="radio"/> | <input type="radio"/> | <input type="radio"/> |
| 19 | Friday    | <input type="radio"/> | <input type="radio"/> | <input type="radio"/> | <input type="radio"/> |
| 20 | Saturday  | <input type="radio"/> | <input type="radio"/> | <input type="radio"/> | <input type="radio"/> |
| 21 | Sunday    | <input type="radio"/> | <input type="radio"/> | <input type="radio"/> | <input type="radio"/> |

26 Muscle Ache

|    |           | None                  | Mild                  | Moderate              | Severe                |
|----|-----------|-----------------------|-----------------------|-----------------------|-----------------------|
| 29 | Monday    | <input type="radio"/> | <input type="radio"/> | <input type="radio"/> | <input type="radio"/> |
| 30 | Tuesday   | <input type="radio"/> | <input type="radio"/> | <input type="radio"/> | <input type="radio"/> |
| 31 | Wednesday | <input type="radio"/> | <input type="radio"/> | <input type="radio"/> | <input type="radio"/> |
| 32 | Thursday  | <input type="radio"/> | <input type="radio"/> | <input type="radio"/> | <input type="radio"/> |
| 33 | Friday    | <input type="radio"/> | <input type="radio"/> | <input type="radio"/> | <input type="radio"/> |
| 34 | Saturday  | <input type="radio"/> | <input type="radio"/> | <input type="radio"/> | <input type="radio"/> |
| 35 | Sunday    | <input type="radio"/> | <input type="radio"/> | <input type="radio"/> | <input type="radio"/> |

41 Bone or Joint ache

|    |           | None                  | Mild                  | Moderate              | Severe                |
|----|-----------|-----------------------|-----------------------|-----------------------|-----------------------|
| 44 | Monday    | <input type="radio"/> | <input type="radio"/> | <input type="radio"/> | <input type="radio"/> |
| 45 | Tuesday   | <input type="radio"/> | <input type="radio"/> | <input type="radio"/> | <input type="radio"/> |
| 46 | Wednesday | <input type="radio"/> | <input type="radio"/> | <input type="radio"/> | <input type="radio"/> |
| 47 | Thursday  | <input type="radio"/> | <input type="radio"/> | <input type="radio"/> | <input type="radio"/> |
| 48 | Friday    | <input type="radio"/> | <input type="radio"/> | <input type="radio"/> | <input type="radio"/> |
| 49 | Saturday  | <input type="radio"/> | <input type="radio"/> | <input type="radio"/> | <input type="radio"/> |
| 50 | Sunday    | <input type="radio"/> | <input type="radio"/> | <input type="radio"/> | <input type="radio"/> |

55 Loss of Appetite

|    |  | None                  | Mild                  | Moderate              | Severe                |
|----|--|-----------------------|-----------------------|-----------------------|-----------------------|
| 56 |  | <input type="radio"/> | <input type="radio"/> | <input type="radio"/> | <input type="radio"/> |
| 57 |  | <input type="radio"/> | <input type="radio"/> | <input type="radio"/> | <input type="radio"/> |
| 58 |  | <input type="radio"/> | <input type="radio"/> | <input type="radio"/> | <input type="radio"/> |
| 59 |  | <input type="radio"/> | <input type="radio"/> | <input type="radio"/> | <input type="radio"/> |
| 60 |  | <input type="radio"/> | <input type="radio"/> | <input type="radio"/> | <input type="radio"/> |

|    |           | None                  | Mild                  | Moderate              | Severe                |
|----|-----------|-----------------------|-----------------------|-----------------------|-----------------------|
| 1  | Monday    | <input type="radio"/> | <input type="radio"/> | <input type="radio"/> | <input type="radio"/> |
| 2  | Tuesday   | <input type="radio"/> | <input type="radio"/> | <input type="radio"/> | <input type="radio"/> |
| 3  | Wednesday | <input type="radio"/> | <input type="radio"/> | <input type="radio"/> | <input type="radio"/> |
| 4  | Thursday  | <input type="radio"/> | <input type="radio"/> | <input type="radio"/> | <input type="radio"/> |
| 5  | Friday    | <input type="radio"/> | <input type="radio"/> | <input type="radio"/> | <input type="radio"/> |
| 6  | Saturday  | <input type="radio"/> | <input type="radio"/> | <input type="radio"/> | <input type="radio"/> |
| 7  | Sunday    | <input type="radio"/> | <input type="radio"/> | <input type="radio"/> | <input type="radio"/> |
| 8  |           |                       |                       |                       |                       |
| 9  |           |                       |                       |                       |                       |
| 10 |           |                       |                       |                       |                       |
| 11 |           |                       |                       |                       |                       |

---

 12 Headache
 

---

|    |           | None                  | Mild                  | Moderate              | Severe                |
|----|-----------|-----------------------|-----------------------|-----------------------|-----------------------|
| 14 |           |                       |                       |                       |                       |
| 15 | Monday    | <input type="radio"/> | <input type="radio"/> | <input type="radio"/> | <input type="radio"/> |
| 16 | Tuesday   | <input type="radio"/> | <input type="radio"/> | <input type="radio"/> | <input type="radio"/> |
| 17 | Wednesday | <input type="radio"/> | <input type="radio"/> | <input type="radio"/> | <input type="radio"/> |
| 18 | Thursday  | <input type="radio"/> | <input type="radio"/> | <input type="radio"/> | <input type="radio"/> |
| 19 | Friday    | <input type="radio"/> | <input type="radio"/> | <input type="radio"/> | <input type="radio"/> |
| 20 | Saturday  | <input type="radio"/> | <input type="radio"/> | <input type="radio"/> | <input type="radio"/> |
| 21 | Sunday    | <input type="radio"/> | <input type="radio"/> | <input type="radio"/> | <input type="radio"/> |
| 22 |           |                       |                       |                       |                       |
| 23 |           |                       |                       |                       |                       |
| 24 |           |                       |                       |                       |                       |
| 25 |           |                       |                       |                       |                       |

---

 26 Confusion, disorientation, or hallucinations (altered mental state)
 

---

|    |           | None                  | Mild                  | Moderate              | Severe                |
|----|-----------|-----------------------|-----------------------|-----------------------|-----------------------|
| 28 |           |                       |                       |                       |                       |
| 29 | Monday    | <input type="radio"/> | <input type="radio"/> | <input type="radio"/> | <input type="radio"/> |
| 30 | Tuesday   | <input type="radio"/> | <input type="radio"/> | <input type="radio"/> | <input type="radio"/> |
| 31 | Wednesday | <input type="radio"/> | <input type="radio"/> | <input type="radio"/> | <input type="radio"/> |
| 32 | Thursday  | <input type="radio"/> | <input type="radio"/> | <input type="radio"/> | <input type="radio"/> |
| 33 | Friday    | <input type="radio"/> | <input type="radio"/> | <input type="radio"/> | <input type="radio"/> |
| 34 | Saturday  | <input type="radio"/> | <input type="radio"/> | <input type="radio"/> | <input type="radio"/> |
| 35 | Sunday    | <input type="radio"/> | <input type="radio"/> | <input type="radio"/> | <input type="radio"/> |
| 36 |           |                       |                       |                       |                       |
| 37 |           |                       |                       |                       |                       |
| 38 |           |                       |                       |                       |                       |
| 39 |           |                       |                       |                       |                       |

---

 41 Lack of Concentration
 

---

|    |           | None                  | Mild                  | Moderate              | Severe                |
|----|-----------|-----------------------|-----------------------|-----------------------|-----------------------|
| 43 |           |                       |                       |                       |                       |
| 44 | Monday    | <input type="radio"/> | <input type="radio"/> | <input type="radio"/> | <input type="radio"/> |
| 45 | Tuesday   | <input type="radio"/> | <input type="radio"/> | <input type="radio"/> | <input type="radio"/> |
| 46 | Wednesday | <input type="radio"/> | <input type="radio"/> | <input type="radio"/> | <input type="radio"/> |
| 47 | Thursday  | <input type="radio"/> | <input type="radio"/> | <input type="radio"/> | <input type="radio"/> |
| 48 | Friday    | <input type="radio"/> | <input type="radio"/> | <input type="radio"/> | <input type="radio"/> |
| 49 | Saturday  | <input type="radio"/> | <input type="radio"/> | <input type="radio"/> | <input type="radio"/> |
| 50 | Sunday    | <input type="radio"/> | <input type="radio"/> | <input type="radio"/> | <input type="radio"/> |
| 51 |           |                       |                       |                       |                       |
| 52 |           |                       |                       |                       |                       |
| 53 |           |                       |                       |                       |                       |

---

 55 Lightheaded or Dizzy
 

---

 56  
 57  
 58  
 59  
 60

|             | None                  | Mild                  | Moderate              | Severe                |
|-------------|-----------------------|-----------------------|-----------------------|-----------------------|
| 1 Monday    | <input type="radio"/> | <input type="radio"/> | <input type="radio"/> | <input type="radio"/> |
| 2 Tuesday   | <input type="radio"/> | <input type="radio"/> | <input type="radio"/> | <input type="radio"/> |
| 3 Wednesday | <input type="radio"/> | <input type="radio"/> | <input type="radio"/> | <input type="radio"/> |
| 4 Thursday  | <input type="radio"/> | <input type="radio"/> | <input type="radio"/> | <input type="radio"/> |
| 5 Friday    | <input type="radio"/> | <input type="radio"/> | <input type="radio"/> | <input type="radio"/> |
| 6 Saturday  | <input type="radio"/> | <input type="radio"/> | <input type="radio"/> | <input type="radio"/> |
| 7 Sunday    | <input type="radio"/> | <input type="radio"/> | <input type="radio"/> | <input type="radio"/> |
| 8           |                       |                       |                       |                       |
| 9           |                       |                       |                       |                       |
| 10          |                       |                       |                       |                       |
| 11          |                       |                       |                       |                       |

12 Not Sleeping

|              | None                  | Mild                  | Moderate              | Severe                |
|--------------|-----------------------|-----------------------|-----------------------|-----------------------|
| 15 Monday    | <input type="radio"/> | <input type="radio"/> | <input type="radio"/> | <input type="radio"/> |
| 16 Tuesday   | <input type="radio"/> | <input type="radio"/> | <input type="radio"/> | <input type="radio"/> |
| 17 Wednesday | <input type="radio"/> | <input type="radio"/> | <input type="radio"/> | <input type="radio"/> |
| 18 Thursday  | <input type="radio"/> | <input type="radio"/> | <input type="radio"/> | <input type="radio"/> |
| 19 Friday    | <input type="radio"/> | <input type="radio"/> | <input type="radio"/> | <input type="radio"/> |
| 20 Saturday  | <input type="radio"/> | <input type="radio"/> | <input type="radio"/> | <input type="radio"/> |
| 21 Sunday    | <input type="radio"/> | <input type="radio"/> | <input type="radio"/> | <input type="radio"/> |
| 22           |                       |                       |                       |                       |
| 23           |                       |                       |                       |                       |
| 24           |                       |                       |                       |                       |
| 25           |                       |                       |                       |                       |

26 Fatigue/Feeling Unusually Tired

|              | None                  | Mild                  | Moderate              | Severe                |
|--------------|-----------------------|-----------------------|-----------------------|-----------------------|
| 29 Monday    | <input type="radio"/> | <input type="radio"/> | <input type="radio"/> | <input type="radio"/> |
| 30 Tuesday   | <input type="radio"/> | <input type="radio"/> | <input type="radio"/> | <input type="radio"/> |
| 31 Wednesday | <input type="radio"/> | <input type="radio"/> | <input type="radio"/> | <input type="radio"/> |
| 32 Thursday  | <input type="radio"/> | <input type="radio"/> | <input type="radio"/> | <input type="radio"/> |
| 33 Friday    | <input type="radio"/> | <input type="radio"/> | <input type="radio"/> | <input type="radio"/> |
| 34 Saturday  | <input type="radio"/> | <input type="radio"/> | <input type="radio"/> | <input type="radio"/> |
| 35 Sunday    | <input type="radio"/> | <input type="radio"/> | <input type="radio"/> | <input type="radio"/> |
| 36           |                       |                       |                       |                       |
| 37           |                       |                       |                       |                       |
| 38           |                       |                       |                       |                       |
| 39           |                       |                       |                       |                       |
| 40           |                       |                       |                       |                       |

41 Difficulties with Daily Activities

|              | None                  | Mild                  | Moderate              | Severe                |
|--------------|-----------------------|-----------------------|-----------------------|-----------------------|
| 44 Monday    | <input type="radio"/> | <input type="radio"/> | <input type="radio"/> | <input type="radio"/> |
| 45 Tuesday   | <input type="radio"/> | <input type="radio"/> | <input type="radio"/> | <input type="radio"/> |
| 46 Wednesday | <input type="radio"/> | <input type="radio"/> | <input type="radio"/> | <input type="radio"/> |
| 47 Thursday  | <input type="radio"/> | <input type="radio"/> | <input type="radio"/> | <input type="radio"/> |
| 48 Friday    | <input type="radio"/> | <input type="radio"/> | <input type="radio"/> | <input type="radio"/> |
| 49 Saturday  | <input type="radio"/> | <input type="radio"/> | <input type="radio"/> | <input type="radio"/> |
| 50 Sunday    | <input type="radio"/> | <input type="radio"/> | <input type="radio"/> | <input type="radio"/> |
| 51           |                       |                       |                       |                       |
| 52           |                       |                       |                       |                       |
| 53           |                       |                       |                       |                       |
| 54           |                       |                       |                       |                       |

55 Needed extra time in bed

|    |  |  |  |  |
|----|--|--|--|--|
| 56 |  |  |  |  |
| 57 |  |  |  |  |
| 58 |  |  |  |  |
| 59 |  |  |  |  |
| 60 |  |  |  |  |

|    |           | None                  | Mild                  | Moderate              | Severe                |
|----|-----------|-----------------------|-----------------------|-----------------------|-----------------------|
| 1  | Monday    | <input type="radio"/> | <input type="radio"/> | <input type="radio"/> | <input type="radio"/> |
| 2  | Tuesday   | <input type="radio"/> | <input type="radio"/> | <input type="radio"/> | <input type="radio"/> |
| 3  | Wednesday | <input type="radio"/> | <input type="radio"/> | <input type="radio"/> | <input type="radio"/> |
| 4  | Thursday  | <input type="radio"/> | <input type="radio"/> | <input type="radio"/> | <input type="radio"/> |
| 5  | Friday    | <input type="radio"/> | <input type="radio"/> | <input type="radio"/> | <input type="radio"/> |
| 6  | Saturday  | <input type="radio"/> | <input type="radio"/> | <input type="radio"/> | <input type="radio"/> |
| 7  | Sunday    | <input type="radio"/> | <input type="radio"/> | <input type="radio"/> | <input type="radio"/> |
| 8  |           |                       |                       |                       |                       |
| 9  |           |                       |                       |                       |                       |
| 10 |           |                       |                       |                       |                       |
| 11 |           |                       |                       |                       |                       |

12 Could not get out of bed

|    |           | None                  | Mild                  | Moderate              | Severe                |
|----|-----------|-----------------------|-----------------------|-----------------------|-----------------------|
| 14 |           |                       |                       |                       |                       |
| 15 | Monday    | <input type="radio"/> | <input type="radio"/> | <input type="radio"/> | <input type="radio"/> |
| 16 | Tuesday   | <input type="radio"/> | <input type="radio"/> | <input type="radio"/> | <input type="radio"/> |
| 17 | Wednesday | <input type="radio"/> | <input type="radio"/> | <input type="radio"/> | <input type="radio"/> |
| 18 | Thursday  | <input type="radio"/> | <input type="radio"/> | <input type="radio"/> | <input type="radio"/> |
| 19 | Friday    | <input type="radio"/> | <input type="radio"/> | <input type="radio"/> | <input type="radio"/> |
| 20 | Saturday  | <input type="radio"/> | <input type="radio"/> | <input type="radio"/> | <input type="radio"/> |
| 21 | Sunday    | <input type="radio"/> | <input type="radio"/> | <input type="radio"/> | <input type="radio"/> |
| 22 |           |                       |                       |                       |                       |
| 23 |           |                       |                       |                       |                       |
| 24 |           |                       |                       |                       |                       |
| 25 |           |                       |                       |                       |                       |
| 26 |           |                       |                       |                       |                       |
| 27 |           |                       |                       |                       |                       |
| 28 |           |                       |                       |                       |                       |
| 29 |           |                       |                       |                       |                       |
| 30 |           |                       |                       |                       |                       |
| 31 |           |                       |                       |                       |                       |
| 32 |           |                       |                       |                       |                       |
| 33 |           |                       |                       |                       |                       |
| 34 |           |                       |                       |                       |                       |
| 35 |           |                       |                       |                       |                       |
| 36 |           |                       |                       |                       |                       |
| 37 |           |                       |                       |                       |                       |
| 38 |           |                       |                       |                       |                       |
| 39 |           |                       |                       |                       |                       |
| 40 |           |                       |                       |                       |                       |
| 41 |           |                       |                       |                       |                       |
| 42 |           |                       |                       |                       |                       |
| 43 |           |                       |                       |                       |                       |
| 44 |           |                       |                       |                       |                       |
| 45 |           |                       |                       |                       |                       |
| 46 |           |                       |                       |                       |                       |
| 47 |           |                       |                       |                       |                       |
| 48 |           |                       |                       |                       |                       |
| 49 |           |                       |                       |                       |                       |
| 50 |           |                       |                       |                       |                       |
| 51 |           |                       |                       |                       |                       |
| 52 |           |                       |                       |                       |                       |
| 53 |           |                       |                       |                       |                       |
| 54 |           |                       |                       |                       |                       |
| 55 |           |                       |                       |                       |                       |
| 56 |           |                       |                       |                       |                       |
| 57 |           |                       |                       |                       |                       |
| 58 |           |                       |                       |                       |                       |
| 59 |           |                       |                       |                       |                       |
| 60 |           |                       |                       |                       |                       |

For peer review only

**Respiratory Symptoms - [go\_arm\_1][hh1\_fname] [go\_arm\_1][hh1\_sname]**

[go\_arm\_1][hh1\_fname] [go\_arm\_1][hh1\_sname]: Which  
Respiratory symptoms did you have?  
Select all that apply

- Runny Nose
- Blocked Nose
- Sinus pain / congestion
- Dry cough
- Coughing up Green Phlegm
- Coughing up White Phlegm
- Loss or change to sense of smell
- Loss or change to sense of taste
- Sneezing
- Sore Throat
- Swollen tonsils
- Swollen glands (enlarged lymph nodes)
- Ear pain or change in hearing
- Fluid leaking from ear
- Shortness of breath difficulty breathing
- Wheezing
- Chest pain (not changed by breathing or moving)
- Chest pain when breathing in
- None of these symptoms

Please identify how severe your symptoms were

Runny Nose

|           | None                  | Mild                  | Moderate              | Severe                |
|-----------|-----------------------|-----------------------|-----------------------|-----------------------|
| Monday    | <input type="radio"/> | <input type="radio"/> | <input type="radio"/> | <input type="radio"/> |
| Tuesday   | <input type="radio"/> | <input type="radio"/> | <input type="radio"/> | <input type="radio"/> |
| Wednesday | <input type="radio"/> | <input type="radio"/> | <input type="radio"/> | <input type="radio"/> |
| Thursday  | <input type="radio"/> | <input type="radio"/> | <input type="radio"/> | <input type="radio"/> |
| Friday    | <input type="radio"/> | <input type="radio"/> | <input type="radio"/> | <input type="radio"/> |
| Saturday  | <input type="radio"/> | <input type="radio"/> | <input type="radio"/> | <input type="radio"/> |
| Sunday    | <input type="radio"/> | <input type="radio"/> | <input type="radio"/> | <input type="radio"/> |

Blocked Nose

|           | None                  | Mild                  | Moderate              | Severe                |
|-----------|-----------------------|-----------------------|-----------------------|-----------------------|
| Monday    | <input type="radio"/> | <input type="radio"/> | <input type="radio"/> | <input type="radio"/> |
| Tuesday   | <input type="radio"/> | <input type="radio"/> | <input type="radio"/> | <input type="radio"/> |
| Wednesday | <input type="radio"/> | <input type="radio"/> | <input type="radio"/> | <input type="radio"/> |
| Thursday  | <input type="radio"/> | <input type="radio"/> | <input type="radio"/> | <input type="radio"/> |
| Friday    | <input type="radio"/> | <input type="radio"/> | <input type="radio"/> | <input type="radio"/> |
| Saturday  | <input type="radio"/> | <input type="radio"/> | <input type="radio"/> | <input type="radio"/> |
| Sunday    | <input type="radio"/> | <input type="radio"/> | <input type="radio"/> | <input type="radio"/> |

Sinus Pain/Congestion

|        | None                  | Mild                  | Moderate              | Severe                |
|--------|-----------------------|-----------------------|-----------------------|-----------------------|
| Monday | <input type="radio"/> | <input type="radio"/> | <input type="radio"/> | <input type="radio"/> |

|   |           |                       |                       |                       |                       |
|---|-----------|-----------------------|-----------------------|-----------------------|-----------------------|
| 1 | Tuesday   | <input type="radio"/> | <input type="radio"/> | <input type="radio"/> | <input type="radio"/> |
| 2 | Wednesday | <input type="radio"/> | <input type="radio"/> | <input type="radio"/> | <input type="radio"/> |
| 3 | Thursday  | <input type="radio"/> | <input type="radio"/> | <input type="radio"/> | <input type="radio"/> |
| 4 | Friday    | <input type="radio"/> | <input type="radio"/> | <input type="radio"/> | <input type="radio"/> |
| 5 | Saturday  | <input type="radio"/> | <input type="radio"/> | <input type="radio"/> | <input type="radio"/> |
| 6 | Sunday    | <input type="radio"/> | <input type="radio"/> | <input type="radio"/> | <input type="radio"/> |
| 7 |           |                       |                       |                       |                       |
| 8 |           |                       |                       |                       |                       |
| 9 |           |                       |                       |                       |                       |

10  
11 Dry cough

| 12 |           | None                  | Mild                  | Moderate              | Severe                |
|----|-----------|-----------------------|-----------------------|-----------------------|-----------------------|
| 13 |           |                       |                       |                       |                       |
| 14 | Monday    | <input type="radio"/> | <input type="radio"/> | <input type="radio"/> | <input type="radio"/> |
| 15 | Tuesday   | <input type="radio"/> | <input type="radio"/> | <input type="radio"/> | <input type="radio"/> |
| 16 | Wednesday | <input type="radio"/> | <input type="radio"/> | <input type="radio"/> | <input type="radio"/> |
| 17 | Thursday  | <input type="radio"/> | <input type="radio"/> | <input type="radio"/> | <input type="radio"/> |
| 18 | Friday    | <input type="radio"/> | <input type="radio"/> | <input type="radio"/> | <input type="radio"/> |
| 19 | Saturday  | <input type="radio"/> | <input type="radio"/> | <input type="radio"/> | <input type="radio"/> |
| 20 | Sunday    | <input type="radio"/> | <input type="radio"/> | <input type="radio"/> | <input type="radio"/> |
| 21 |           |                       |                       |                       |                       |
| 22 |           |                       |                       |                       |                       |
| 23 |           |                       |                       |                       |                       |
| 24 |           |                       |                       |                       |                       |

25 Coughing up Green Phlegm

| 26 |           | None                  | Mild                  | Moderate              | Severe                |
|----|-----------|-----------------------|-----------------------|-----------------------|-----------------------|
| 27 |           |                       |                       |                       |                       |
| 28 | Monday    | <input type="radio"/> | <input type="radio"/> | <input type="radio"/> | <input type="radio"/> |
| 29 | Tuesday   | <input type="radio"/> | <input type="radio"/> | <input type="radio"/> | <input type="radio"/> |
| 30 | Wednesday | <input type="radio"/> | <input type="radio"/> | <input type="radio"/> | <input type="radio"/> |
| 31 | Thursday  | <input type="radio"/> | <input type="radio"/> | <input type="radio"/> | <input type="radio"/> |
| 32 | Friday    | <input type="radio"/> | <input type="radio"/> | <input type="radio"/> | <input type="radio"/> |
| 33 | Saturday  | <input type="radio"/> | <input type="radio"/> | <input type="radio"/> | <input type="radio"/> |
| 34 | Sunday    | <input type="radio"/> | <input type="radio"/> | <input type="radio"/> | <input type="radio"/> |
| 35 |           |                       |                       |                       |                       |
| 36 |           |                       |                       |                       |                       |
| 37 |           |                       |                       |                       |                       |
| 38 |           |                       |                       |                       |                       |

39 Coughing up White Phlegm

| 40 |           | None                  | Mild                  | Moderate              | Severe                |
|----|-----------|-----------------------|-----------------------|-----------------------|-----------------------|
| 41 |           |                       |                       |                       |                       |
| 42 | Monday    | <input type="radio"/> | <input type="radio"/> | <input type="radio"/> | <input type="radio"/> |
| 43 | Tuesday   | <input type="radio"/> | <input type="radio"/> | <input type="radio"/> | <input type="radio"/> |
| 44 | Wednesday | <input type="radio"/> | <input type="radio"/> | <input type="radio"/> | <input type="radio"/> |
| 45 | Thursday  | <input type="radio"/> | <input type="radio"/> | <input type="radio"/> | <input type="radio"/> |
| 46 | Friday    | <input type="radio"/> | <input type="radio"/> | <input type="radio"/> | <input type="radio"/> |
| 47 | Saturday  | <input type="radio"/> | <input type="radio"/> | <input type="radio"/> | <input type="radio"/> |
| 48 | Sunday    | <input type="radio"/> | <input type="radio"/> | <input type="radio"/> | <input type="radio"/> |
| 49 |           |                       |                       |                       |                       |
| 50 |           |                       |                       |                       |                       |
| 51 |           |                       |                       |                       |                       |
| 52 |           |                       |                       |                       |                       |
| 53 |           |                       |                       |                       |                       |

54 Loss or change to sense of smell

55  
56  
57  
58  
59  
60

|   |           | None                  | Mild                  | Moderate              | Severe                |
|---|-----------|-----------------------|-----------------------|-----------------------|-----------------------|
| 1 | Monday    | <input type="radio"/> | <input type="radio"/> | <input type="radio"/> | <input type="radio"/> |
| 2 | Tuesday   | <input type="radio"/> | <input type="radio"/> | <input type="radio"/> | <input type="radio"/> |
| 3 | Wednesday | <input type="radio"/> | <input type="radio"/> | <input type="radio"/> | <input type="radio"/> |
| 4 | Thursday  | <input type="radio"/> | <input type="radio"/> | <input type="radio"/> | <input type="radio"/> |
| 5 | Friday    | <input type="radio"/> | <input type="radio"/> | <input type="radio"/> | <input type="radio"/> |
| 6 | Saturday  | <input type="radio"/> | <input type="radio"/> | <input type="radio"/> | <input type="radio"/> |
| 7 | Sunday    | <input type="radio"/> | <input type="radio"/> | <input type="radio"/> | <input type="radio"/> |

12 Loss or change to sense of taste

|    |           | None                  | Mild                  | Moderate              | Severe                |
|----|-----------|-----------------------|-----------------------|-----------------------|-----------------------|
| 15 | Monday    | <input type="radio"/> | <input type="radio"/> | <input type="radio"/> | <input type="radio"/> |
| 16 | Tuesday   | <input type="radio"/> | <input type="radio"/> | <input type="radio"/> | <input type="radio"/> |
| 17 | Wednesday | <input type="radio"/> | <input type="radio"/> | <input type="radio"/> | <input type="radio"/> |
| 18 | Thursday  | <input type="radio"/> | <input type="radio"/> | <input type="radio"/> | <input type="radio"/> |
| 19 | Friday    | <input type="radio"/> | <input type="radio"/> | <input type="radio"/> | <input type="radio"/> |
| 20 | Saturday  | <input type="radio"/> | <input type="radio"/> | <input type="radio"/> | <input type="radio"/> |
| 21 | Sunday    | <input type="radio"/> | <input type="radio"/> | <input type="radio"/> | <input type="radio"/> |

26 Sneezing

|    |           | None                  | Mild                  | Moderate              | Severe                |
|----|-----------|-----------------------|-----------------------|-----------------------|-----------------------|
| 29 | Monday    | <input type="radio"/> | <input type="radio"/> | <input type="radio"/> | <input type="radio"/> |
| 30 | Tuesday   | <input type="radio"/> | <input type="radio"/> | <input type="radio"/> | <input type="radio"/> |
| 31 | Wednesday | <input type="radio"/> | <input type="radio"/> | <input type="radio"/> | <input type="radio"/> |
| 32 | Thursday  | <input type="radio"/> | <input type="radio"/> | <input type="radio"/> | <input type="radio"/> |
| 33 | Friday    | <input type="radio"/> | <input type="radio"/> | <input type="radio"/> | <input type="radio"/> |
| 34 | Saturday  | <input type="radio"/> | <input type="radio"/> | <input type="radio"/> | <input type="radio"/> |
| 35 | Sunday    | <input type="radio"/> | <input type="radio"/> | <input type="radio"/> | <input type="radio"/> |

41 Sore Throat

|    |           | None                  | Mild                  | Moderate              | Severe                |
|----|-----------|-----------------------|-----------------------|-----------------------|-----------------------|
| 44 | Monday    | <input type="radio"/> | <input type="radio"/> | <input type="radio"/> | <input type="radio"/> |
| 45 | Tuesday   | <input type="radio"/> | <input type="radio"/> | <input type="radio"/> | <input type="radio"/> |
| 46 | Wednesday | <input type="radio"/> | <input type="radio"/> | <input type="radio"/> | <input type="radio"/> |
| 47 | Thursday  | <input type="radio"/> | <input type="radio"/> | <input type="radio"/> | <input type="radio"/> |
| 48 | Friday    | <input type="radio"/> | <input type="radio"/> | <input type="radio"/> | <input type="radio"/> |
| 49 | Saturday  | <input type="radio"/> | <input type="radio"/> | <input type="radio"/> | <input type="radio"/> |
| 50 | Sunday    | <input type="radio"/> | <input type="radio"/> | <input type="radio"/> | <input type="radio"/> |

55 Swollen Tonsils

|    |  | None | Mild | Moderate | Severe |
|----|--|------|------|----------|--------|
| 56 |  |      |      |          |        |
| 57 |  |      |      |          |        |
| 58 |  |      |      |          |        |
| 59 |  |      |      |          |        |
| 60 |  |      |      |          |        |

|   |           | None                  | Mild                  | Moderate              | Severe                |
|---|-----------|-----------------------|-----------------------|-----------------------|-----------------------|
| 1 | Monday    | <input type="radio"/> | <input type="radio"/> | <input type="radio"/> | <input type="radio"/> |
| 2 | Tuesday   | <input type="radio"/> | <input type="radio"/> | <input type="radio"/> | <input type="radio"/> |
| 3 | Wednesday | <input type="radio"/> | <input type="radio"/> | <input type="radio"/> | <input type="radio"/> |
| 4 | Thursday  | <input type="radio"/> | <input type="radio"/> | <input type="radio"/> | <input type="radio"/> |
| 5 | Friday    | <input type="radio"/> | <input type="radio"/> | <input type="radio"/> | <input type="radio"/> |
| 6 | Saturday  | <input type="radio"/> | <input type="radio"/> | <input type="radio"/> | <input type="radio"/> |
| 7 | Sunday    | <input type="radio"/> | <input type="radio"/> | <input type="radio"/> | <input type="radio"/> |

12 Swollen Glands (enlarged lymph nodes)

|    |           | None                  | Mild                  | Moderate              | Severe                |
|----|-----------|-----------------------|-----------------------|-----------------------|-----------------------|
| 15 | Monday    | <input type="radio"/> | <input type="radio"/> | <input type="radio"/> | <input type="radio"/> |
| 16 | Tuesday   | <input type="radio"/> | <input type="radio"/> | <input type="radio"/> | <input type="radio"/> |
| 17 | Wednesday | <input type="radio"/> | <input type="radio"/> | <input type="radio"/> | <input type="radio"/> |
| 18 | Thursday  | <input type="radio"/> | <input type="radio"/> | <input type="radio"/> | <input type="radio"/> |
| 19 | Friday    | <input type="radio"/> | <input type="radio"/> | <input type="radio"/> | <input type="radio"/> |
| 20 | Saturday  | <input type="radio"/> | <input type="radio"/> | <input type="radio"/> | <input type="radio"/> |
| 21 | Sunday    | <input type="radio"/> | <input type="radio"/> | <input type="radio"/> | <input type="radio"/> |

26 Ear pain or change in hearing

|    |           | None                  | Mild                  | Moderate              | Severe                |
|----|-----------|-----------------------|-----------------------|-----------------------|-----------------------|
| 29 | Monday    | <input type="radio"/> | <input type="radio"/> | <input type="radio"/> | <input type="radio"/> |
| 30 | Tuesday   | <input type="radio"/> | <input type="radio"/> | <input type="radio"/> | <input type="radio"/> |
| 31 | Wednesday | <input type="radio"/> | <input type="radio"/> | <input type="radio"/> | <input type="radio"/> |
| 32 | Thursday  | <input type="radio"/> | <input type="radio"/> | <input type="radio"/> | <input type="radio"/> |
| 33 | Friday    | <input type="radio"/> | <input type="radio"/> | <input type="radio"/> | <input type="radio"/> |
| 34 | Saturday  | <input type="radio"/> | <input type="radio"/> | <input type="radio"/> | <input type="radio"/> |
| 35 | Sunday    | <input type="radio"/> | <input type="radio"/> | <input type="radio"/> | <input type="radio"/> |

41 Fluid leaking from ear

|    |           | None                  | Mild                  | Moderate              | Severe                |
|----|-----------|-----------------------|-----------------------|-----------------------|-----------------------|
| 44 | Monday    | <input type="radio"/> | <input type="radio"/> | <input type="radio"/> | <input type="radio"/> |
| 45 | Tuesday   | <input type="radio"/> | <input type="radio"/> | <input type="radio"/> | <input type="radio"/> |
| 46 | Wednesday | <input type="radio"/> | <input type="radio"/> | <input type="radio"/> | <input type="radio"/> |
| 47 | Thursday  | <input type="radio"/> | <input type="radio"/> | <input type="radio"/> | <input type="radio"/> |
| 48 | Friday    | <input type="radio"/> | <input type="radio"/> | <input type="radio"/> | <input type="radio"/> |
| 49 | Saturday  | <input type="radio"/> | <input type="radio"/> | <input type="radio"/> | <input type="radio"/> |
| 50 | Sunday    | <input type="radio"/> | <input type="radio"/> | <input type="radio"/> | <input type="radio"/> |

55 Shortness of Breath/difficulty breathing

|    |  | None | Mild | Moderate | Severe |
|----|--|------|------|----------|--------|
| 56 |  |      |      |          |        |
| 57 |  |      |      |          |        |
| 58 |  |      |      |          |        |
| 59 |  |      |      |          |        |
| 60 |  |      |      |          |        |



|             | None                  | Mild                  | Moderate              | Severe                |
|-------------|-----------------------|-----------------------|-----------------------|-----------------------|
| 1 Monday    | <input type="radio"/> | <input type="radio"/> | <input type="radio"/> | <input type="radio"/> |
| 2 Tuesday   | <input type="radio"/> | <input type="radio"/> | <input type="radio"/> | <input type="radio"/> |
| 3 Wednesday | <input type="radio"/> | <input type="radio"/> | <input type="radio"/> | <input type="radio"/> |
| 4 Thursday  | <input type="radio"/> | <input type="radio"/> | <input type="radio"/> | <input type="radio"/> |
| 5 Friday    | <input type="radio"/> | <input type="radio"/> | <input type="radio"/> | <input type="radio"/> |
| 6 Saturday  | <input type="radio"/> | <input type="radio"/> | <input type="radio"/> | <input type="radio"/> |
| 7 Sunday    | <input type="radio"/> | <input type="radio"/> | <input type="radio"/> | <input type="radio"/> |

12 Wheezing

|              | None                  | Mild                  | Moderate              | Severe                |
|--------------|-----------------------|-----------------------|-----------------------|-----------------------|
| 15 Monday    | <input type="radio"/> | <input type="radio"/> | <input type="radio"/> | <input type="radio"/> |
| 16 Tuesday   | <input type="radio"/> | <input type="radio"/> | <input type="radio"/> | <input type="radio"/> |
| 17 Wednesday | <input type="radio"/> | <input type="radio"/> | <input type="radio"/> | <input type="radio"/> |
| 18 Thursday  | <input type="radio"/> | <input type="radio"/> | <input type="radio"/> | <input type="radio"/> |
| 19 Friday    | <input type="radio"/> | <input type="radio"/> | <input type="radio"/> | <input type="radio"/> |
| 20 Saturday  | <input type="radio"/> | <input type="radio"/> | <input type="radio"/> | <input type="radio"/> |
| 21 Sunday    | <input type="radio"/> | <input type="radio"/> | <input type="radio"/> | <input type="radio"/> |

26 Chest pain (not changed by breathing or moving)

|              | None                  | Mild                  | Moderate              | Severe                |
|--------------|-----------------------|-----------------------|-----------------------|-----------------------|
| 29 Monday    | <input type="radio"/> | <input type="radio"/> | <input type="radio"/> | <input type="radio"/> |
| 30 Tuesday   | <input type="radio"/> | <input type="radio"/> | <input type="radio"/> | <input type="radio"/> |
| 31 Wednesday | <input type="radio"/> | <input type="radio"/> | <input type="radio"/> | <input type="radio"/> |
| 32 Thursday  | <input type="radio"/> | <input type="radio"/> | <input type="radio"/> | <input type="radio"/> |
| 33 Friday    | <input type="radio"/> | <input type="radio"/> | <input type="radio"/> | <input type="radio"/> |
| 34 Saturday  | <input type="radio"/> | <input type="radio"/> | <input type="radio"/> | <input type="radio"/> |
| 35 Sunday    | <input type="radio"/> | <input type="radio"/> | <input type="radio"/> | <input type="radio"/> |

41 Chest pain when breathing in

|              | None                  | Mild                  | Moderate              | Severe                |
|--------------|-----------------------|-----------------------|-----------------------|-----------------------|
| 44 Monday    | <input type="radio"/> | <input type="radio"/> | <input type="radio"/> | <input type="radio"/> |
| 45 Tuesday   | <input type="radio"/> | <input type="radio"/> | <input type="radio"/> | <input type="radio"/> |
| 46 Wednesday | <input type="radio"/> | <input type="radio"/> | <input type="radio"/> | <input type="radio"/> |
| 47 Thursday  | <input type="radio"/> | <input type="radio"/> | <input type="radio"/> | <input type="radio"/> |
| 48 Friday    | <input type="radio"/> | <input type="radio"/> | <input type="radio"/> | <input type="radio"/> |
| 49 Saturday  | <input type="radio"/> | <input type="radio"/> | <input type="radio"/> | <input type="radio"/> |
| 50 Sunday    | <input type="radio"/> | <input type="radio"/> | <input type="radio"/> | <input type="radio"/> |

**Other Symptoms - [go\_arm\_1][hh1\_fname] [go\_arm\_1][hh1\_sname]**

[go\_arm\_1][hh1\_fname] [go\_arm\_1][hh1\_sname]: Which eye related symptoms did you have this week?  
Select all that apply

Eye redness  
 Sticky Eye  
 Eye pain  
 Deterioration of eyesight  
 None of these symptoms

[go\_arm\_1][hh1\_fname] [go\_arm\_1][hh1\_sname]: Where did the rash affect you?

Rash (all over)  
 Rash (local)  
 None of these symptoms

Where on the body did the rash affect you?  
\_\_\_\_\_

[go\_arm\_1][hh1\_fname] [go\_arm\_1][hh1\_sname]: Which gastrointestinal symptoms did you have?  
Select all that apply

Diarrhoea (even mild)  
 Vomiting (being sick)  
 Nausea (feeling sick)  
 Abdominal pain (not including menstrual pain)  
 None of these symptoms

Please identify how severe your symptoms were

Red Eye(s)

|           | None                  | Mild                  | Moderate              | Severe                |
|-----------|-----------------------|-----------------------|-----------------------|-----------------------|
| Monday    | <input type="radio"/> | <input type="radio"/> | <input type="radio"/> | <input type="radio"/> |
| Tuesday   | <input type="radio"/> | <input type="radio"/> | <input type="radio"/> | <input type="radio"/> |
| Wednesday | <input type="radio"/> | <input type="radio"/> | <input type="radio"/> | <input type="radio"/> |
| Thursday  | <input type="radio"/> | <input type="radio"/> | <input type="radio"/> | <input type="radio"/> |
| Friday    | <input type="radio"/> | <input type="radio"/> | <input type="radio"/> | <input type="radio"/> |
| Saturday  | <input type="radio"/> | <input type="radio"/> | <input type="radio"/> | <input type="radio"/> |
| Sunday    | <input type="radio"/> | <input type="radio"/> | <input type="radio"/> | <input type="radio"/> |

Sticky Eye(s)

|           | None                  | Mild                  | Moderate              | Severe                |
|-----------|-----------------------|-----------------------|-----------------------|-----------------------|
| Monday    | <input type="radio"/> | <input type="radio"/> | <input type="radio"/> | <input type="radio"/> |
| Tuesday   | <input type="radio"/> | <input type="radio"/> | <input type="radio"/> | <input type="radio"/> |
| Wednesday | <input type="radio"/> | <input type="radio"/> | <input type="radio"/> | <input type="radio"/> |
| Thursday  | <input type="radio"/> | <input type="radio"/> | <input type="radio"/> | <input type="radio"/> |
| Friday    | <input type="radio"/> | <input type="radio"/> | <input type="radio"/> | <input type="radio"/> |
| Saturday  | <input type="radio"/> | <input type="radio"/> | <input type="radio"/> | <input type="radio"/> |
| Sunday    | <input type="radio"/> | <input type="radio"/> | <input type="radio"/> | <input type="radio"/> |

Eye Pain

|    |           | None                  | Mild                  | Moderate              | Severe                |
|----|-----------|-----------------------|-----------------------|-----------------------|-----------------------|
| 1  | Monday    | <input type="radio"/> | <input type="radio"/> | <input type="radio"/> | <input type="radio"/> |
| 2  | Tuesday   | <input type="radio"/> | <input type="radio"/> | <input type="radio"/> | <input type="radio"/> |
| 3  | Wednesday | <input type="radio"/> | <input type="radio"/> | <input type="radio"/> | <input type="radio"/> |
| 4  | Thursday  | <input type="radio"/> | <input type="radio"/> | <input type="radio"/> | <input type="radio"/> |
| 5  | Friday    | <input type="radio"/> | <input type="radio"/> | <input type="radio"/> | <input type="radio"/> |
| 6  | Saturday  | <input type="radio"/> | <input type="radio"/> | <input type="radio"/> | <input type="radio"/> |
| 7  | Sunday    | <input type="radio"/> | <input type="radio"/> | <input type="radio"/> | <input type="radio"/> |
| 8  |           |                       |                       |                       |                       |
| 9  |           |                       |                       |                       |                       |
| 10 |           |                       |                       |                       |                       |
| 11 |           |                       |                       |                       |                       |

12 Deterioration of eyesight

|    |           | None                  | Mild                  | Moderate              | Severe                |
|----|-----------|-----------------------|-----------------------|-----------------------|-----------------------|
| 14 |           |                       |                       |                       |                       |
| 15 | Monday    | <input type="radio"/> | <input type="radio"/> | <input type="radio"/> | <input type="radio"/> |
| 16 | Tuesday   | <input type="radio"/> | <input type="radio"/> | <input type="radio"/> | <input type="radio"/> |
| 17 | Wednesday | <input type="radio"/> | <input type="radio"/> | <input type="radio"/> | <input type="radio"/> |
| 18 | Thursday  | <input type="radio"/> | <input type="radio"/> | <input type="radio"/> | <input type="radio"/> |
| 19 | Friday    | <input type="radio"/> | <input type="radio"/> | <input type="radio"/> | <input type="radio"/> |
| 20 | Saturday  | <input type="radio"/> | <input type="radio"/> | <input type="radio"/> | <input type="radio"/> |
| 21 | Sunday    | <input type="radio"/> | <input type="radio"/> | <input type="radio"/> | <input type="radio"/> |
| 22 |           |                       |                       |                       |                       |
| 23 |           |                       |                       |                       |                       |
| 24 |           |                       |                       |                       |                       |
| 25 |           |                       |                       |                       |                       |

26 Rash - All Over

|    |           | None                  | Mild                  | Moderate              | Severe                |
|----|-----------|-----------------------|-----------------------|-----------------------|-----------------------|
| 29 |           |                       |                       |                       |                       |
| 30 | Monday    | <input type="radio"/> | <input type="radio"/> | <input type="radio"/> | <input type="radio"/> |
| 31 | Tuesday   | <input type="radio"/> | <input type="radio"/> | <input type="radio"/> | <input type="radio"/> |
| 32 | Wednesday | <input type="radio"/> | <input type="radio"/> | <input type="radio"/> | <input type="radio"/> |
| 33 | Thursday  | <input type="radio"/> | <input type="radio"/> | <input type="radio"/> | <input type="radio"/> |
| 34 | Friday    | <input type="radio"/> | <input type="radio"/> | <input type="radio"/> | <input type="radio"/> |
| 35 | Saturday  | <input type="radio"/> | <input type="radio"/> | <input type="radio"/> | <input type="radio"/> |
| 36 | Sunday    | <input type="radio"/> | <input type="radio"/> | <input type="radio"/> | <input type="radio"/> |
| 37 |           |                       |                       |                       |                       |
| 38 |           |                       |                       |                       |                       |
| 39 |           |                       |                       |                       |                       |

41 Rash - Local

|    |           | None                  | Mild                  | Moderate              | Severe                |
|----|-----------|-----------------------|-----------------------|-----------------------|-----------------------|
| 43 |           |                       |                       |                       |                       |
| 44 | Monday    | <input type="radio"/> | <input type="radio"/> | <input type="radio"/> | <input type="radio"/> |
| 45 | Tuesday   | <input type="radio"/> | <input type="radio"/> | <input type="radio"/> | <input type="radio"/> |
| 46 | Wednesday | <input type="radio"/> | <input type="radio"/> | <input type="radio"/> | <input type="radio"/> |
| 47 | Thursday  | <input type="radio"/> | <input type="radio"/> | <input type="radio"/> | <input type="radio"/> |
| 48 | Friday    | <input type="radio"/> | <input type="radio"/> | <input type="radio"/> | <input type="radio"/> |
| 49 | Saturday  | <input type="radio"/> | <input type="radio"/> | <input type="radio"/> | <input type="radio"/> |
| 50 | Sunday    | <input type="radio"/> | <input type="radio"/> | <input type="radio"/> | <input type="radio"/> |
| 51 |           |                       |                       |                       |                       |
| 52 |           |                       |                       |                       |                       |
| 53 |           |                       |                       |                       |                       |

55 Diarrhoea (even mild)

|    |  |  |  |  |  |
|----|--|--|--|--|--|
| 56 |  |  |  |  |  |
| 57 |  |  |  |  |  |
| 58 |  |  |  |  |  |
| 59 |  |  |  |  |  |
| 60 |  |  |  |  |  |

|    |           | None                  | Mild                  | Moderate              | Severe                |
|----|-----------|-----------------------|-----------------------|-----------------------|-----------------------|
| 1  | Monday    | <input type="radio"/> | <input type="radio"/> | <input type="radio"/> | <input type="radio"/> |
| 2  | Tuesday   | <input type="radio"/> | <input type="radio"/> | <input type="radio"/> | <input type="radio"/> |
| 3  | Wednesday | <input type="radio"/> | <input type="radio"/> | <input type="radio"/> | <input type="radio"/> |
| 4  | Thursday  | <input type="radio"/> | <input type="radio"/> | <input type="radio"/> | <input type="radio"/> |
| 5  | Friday    | <input type="radio"/> | <input type="radio"/> | <input type="radio"/> | <input type="radio"/> |
| 6  | Saturday  | <input type="radio"/> | <input type="radio"/> | <input type="radio"/> | <input type="radio"/> |
| 7  | Sunday    | <input type="radio"/> | <input type="radio"/> | <input type="radio"/> | <input type="radio"/> |
| 8  |           |                       |                       |                       |                       |
| 9  |           |                       |                       |                       |                       |
| 10 |           |                       |                       |                       |                       |
| 11 |           |                       |                       |                       |                       |

12 Vomiting (being sick)

|    |           | None                  | Mild                  | Moderate              | Severe                |
|----|-----------|-----------------------|-----------------------|-----------------------|-----------------------|
| 14 |           |                       |                       |                       |                       |
| 15 | Monday    | <input type="radio"/> | <input type="radio"/> | <input type="radio"/> | <input type="radio"/> |
| 16 | Tuesday   | <input type="radio"/> | <input type="radio"/> | <input type="radio"/> | <input type="radio"/> |
| 17 | Wednesday | <input type="radio"/> | <input type="radio"/> | <input type="radio"/> | <input type="radio"/> |
| 18 | Thursday  | <input type="radio"/> | <input type="radio"/> | <input type="radio"/> | <input type="radio"/> |
| 19 | Friday    | <input type="radio"/> | <input type="radio"/> | <input type="radio"/> | <input type="radio"/> |
| 20 | Saturday  | <input type="radio"/> | <input type="radio"/> | <input type="radio"/> | <input type="radio"/> |
| 21 | Sunday    | <input type="radio"/> | <input type="radio"/> | <input type="radio"/> | <input type="radio"/> |
| 22 |           |                       |                       |                       |                       |
| 23 |           |                       |                       |                       |                       |
| 24 |           |                       |                       |                       |                       |
| 25 |           |                       |                       |                       |                       |

26 Nausea (feeling sick)

|    |           | None                  | Mild                  | Moderate              | Severe                |
|----|-----------|-----------------------|-----------------------|-----------------------|-----------------------|
| 28 |           |                       |                       |                       |                       |
| 29 | Monday    | <input type="radio"/> | <input type="radio"/> | <input type="radio"/> | <input type="radio"/> |
| 30 | Tuesday   | <input type="radio"/> | <input type="radio"/> | <input type="radio"/> | <input type="radio"/> |
| 31 | Wednesday | <input type="radio"/> | <input type="radio"/> | <input type="radio"/> | <input type="radio"/> |
| 32 | Thursday  | <input type="radio"/> | <input type="radio"/> | <input type="radio"/> | <input type="radio"/> |
| 33 | Friday    | <input type="radio"/> | <input type="radio"/> | <input type="radio"/> | <input type="radio"/> |
| 34 | Saturday  | <input type="radio"/> | <input type="radio"/> | <input type="radio"/> | <input type="radio"/> |
| 35 | Sunday    | <input type="radio"/> | <input type="radio"/> | <input type="radio"/> | <input type="radio"/> |
| 36 |           |                       |                       |                       |                       |
| 37 |           |                       |                       |                       |                       |
| 38 |           |                       |                       |                       |                       |
| 39 |           |                       |                       |                       |                       |

40 Abdominal pain (not including menstrual pain)

|    |           | None                  | Mild                  | Moderate              | Severe                |
|----|-----------|-----------------------|-----------------------|-----------------------|-----------------------|
| 42 |           |                       |                       |                       |                       |
| 43 | Monday    | <input type="radio"/> | <input type="radio"/> | <input type="radio"/> | <input type="radio"/> |
| 44 | Tuesday   | <input type="radio"/> | <input type="radio"/> | <input type="radio"/> | <input type="radio"/> |
| 45 | Wednesday | <input type="radio"/> | <input type="radio"/> | <input type="radio"/> | <input type="radio"/> |
| 46 | Thursday  | <input type="radio"/> | <input type="radio"/> | <input type="radio"/> | <input type="radio"/> |
| 47 | Friday    | <input type="radio"/> | <input type="radio"/> | <input type="radio"/> | <input type="radio"/> |
| 48 | Saturday  | <input type="radio"/> | <input type="radio"/> | <input type="radio"/> | <input type="radio"/> |
| 49 | Sunday    | <input type="radio"/> | <input type="radio"/> | <input type="radio"/> | <input type="radio"/> |
| 50 |           |                       |                       |                       |                       |
| 51 |           |                       |                       |                       |                       |
| 52 |           |                       |                       |                       |                       |
| 53 |           |                       |                       |                       |                       |
| 54 |           |                       |                       |                       |                       |
| 55 |           |                       |                       |                       |                       |
| 56 |           |                       |                       |                       |                       |
| 57 |           |                       |                       |                       |                       |
| 58 |           |                       |                       |                       |                       |
| 59 |           |                       |                       |                       |                       |
| 60 |           |                       |                       |                       |                       |

**COVID-19 testing for [go\_arm\_1][hh1\_fname] [go\_arm\_1][hh1\_sname]**

[go\_arm\_1][hh1\_fname] [go\_arm\_1][hh1\_sname]: Have you sought COVID-19 testing for this illness via the NHS, government or your employer?  Yes  No

[go\_arm\_1][hh1\_fname] [go\_arm\_1][hh1\_sname]: You said you tried to get tested for COVID-19 via the NHS, government or your employer for this illness. Did you get tested?  Yes  No

[go\_arm\_1][hh1\_fname] [go\_arm\_1][hh1\_sname]: Why did you not get an NHS test for COVID-19?  
 I was advised the test was not needed  
 I am waiting for an NHS test kit to arrive by post  
 I could not get to a testing centre  
 I felt better so decided not to get tested  
 Other - please specify

Other (please specify): \_\_\_\_\_

[go\_arm\_1][hh1\_fname] [go\_arm\_1][hh1\_sname]: How long was the gap between your symptoms starting and you having an NHS COVID-19 test?  
 Same day  
 Next day  
 2 days later  
 3 to 4 days later  
 5 to 7 days later  
 More than a week

What was the result of that test?  
 Positive for COVID-19  
 Negative for COVID-19  
 The result was unclear  
 Still awaiting result

[go\_arm\_1][hh1\_fname] [go\_arm\_1][hh1\_sname]: How long was the gap between your symptoms starting and you getting the NHS test results?  
 Same day  
 Next day  
 2 days later  
 3 to 4 days later  
 5 to 7 days later  
 More than a week

**Tracing - [go\_arm\_1][hh1\_fname] [go\_arm\_1][hh1\_sname]**

If you had an illness that may be COVID-19 you should follow national advice on reporting this illness and seeking care. We will always have a link to the latest advice on the Virus Watch website.

[go\_arm\_1][hh1\_fname] [go\_arm\_1][hh1\_sname]: Have you reported your illness to any organisation other than Virus Watch?  
Select all that apply

- I did not report my illness to any other organisation
- Yes to the NHS Contact tracing app
- Yes to Google/Android contact tracing app
- Yes to the NHS Test and Trace service
- Yes to my employer
- Yes to my GP
- Yes to the NHS 111 online coronavirus service
- Yes to the general NHS 111 service
- Other (please specify)

Other (please specify)

---

[go\_arm\_1][hh1\_fname] [go\_arm\_1][hh1\_sname]: Why did you not report your illness?

- I did not think it was COVID-19
- I didn't feel ill enough to need help
- I didn't know where to report it
- I didn't know I was supposed to report it
- I didn't want to self isolate
- I didn't want my contacts to have to self isolate
- I didn't want others to know that I might have COVID-19

[go\_arm\_1][hh1\_fname] [go\_arm\_1][hh1\_sname]: From the time two days before your illness started to now, have you had direct or close contact with anyone OTHER THAN HOUSEHOLD MEMBERS?

- Non-Household Direct Contacts - these are people you had direct physical contact with or with whom you exchanged at least a few words within a 2 metre distance (e.g. a handshake, embracing, kissing, contact sports).
- Non-Household Close contacts - these are people who were within 2 metres of you for 15 minutes or more but who you did not speak to or touch.
- I did not have direct or close contact with anybody other than household members

How many people did you have DIRECT CONTACT with other than household members?  
Please enter digits only, e.g. '5' and not 'five'

---

How many people did you have CLOSE CONTACT with other than household members?  
Please enter digits only, e.g. '5' and not 'five'

---

[go\_arm\_1][hh1\_fname] [go\_arm\_1][hh1\_sname]: Has anyone contacted you to ask about who you have been in contact with prior to or during your illness(contact tracing)?  
Please select all that apply

- No
- Yes - my GP
- Yes - the NHS Test and Trace System
- Yes - telephone advisory service
- Yes - through an online form
- Yes - through an app
- Yes - through my employer
- Yes - through my place of education
- Yes - the local public team
- Other - please specify

Other please specify:

---

1 [go\_arm\_1][hh1\_fname] [go\_arm\_1][hh1\_sname]: Was  
2 anyone other than a household member asked to  
3 self-isolate because of contact with you?  
4

- Yes - and I know how many were asked to self isolate
- Yes - but I don't know how many were asked to self isolate
- Nobody was asked to self isolate
- I don't know if anyone was asked to self isolate

8 How many people other than household contacts were  
9 asked to self-isolate because of contact with you?  
10 Please enter digits only, e.g. '5' and not 'five'  
11 \_\_\_\_\_  
12  
13  
14  
15  
16  
17  
18  
19  
20  
21  
22  
23  
24  
25  
26  
27  
28  
29  
30  
31  
32  
33  
34  
35  
36  
37  
38  
39  
40  
41  
42  
43  
44  
45  
46  
47  
48  
49  
50  
51  
52  
53  
54  
55  
56  
57  
58  
59  
60

For peer review only

**Health Advice / Consultation - [go\_arm\_1][hh1\_fname] [go\_arm\_1][hh1\_sname]**

[go\_arm\_1][hh1\_fname] [go\_arm\_1][hh1\_sname]: You should follow official national advice about what to do if you have symptoms of COVID-19. We will always include a link to the latest advice on the Virus Watch website.

[go\_arm\_1][hh1\_fname] [go\_arm\_1][hh1\_sname]: Did the illness lead you (or someone else on your behalf) to seek advice about your symptoms this week?  
This includes advice from: NHS 111 Pharmacies Nurses or doctors The internet Friends and family

- Yes  
 No

Where was the advice or information sought from?

- NHS 111 COVID-19 website  
 NHS 111 COVID-19 phone line  
 COVID-19 testing centre  
 Internet (e.g. WebMD , NHS choices)  
 Pharmacist  
 GP (by phone)  
 GP (visit to practice)  
 GP (online (including video))  
 Walk-in centre  
 A&E  
 Hospital  
 Friends or family  
 Other (please specify)

Other (Please Specify): \_\_\_\_\_

On which days was the medical advice or information sought from these sources Please check all that that apply on each day

|                                     | Monday                   | Tuesday                  | Wednesday                | Thursday                 | Friday                   | Saturday                 | Sunday                   |
|-------------------------------------|--------------------------|--------------------------|--------------------------|--------------------------|--------------------------|--------------------------|--------------------------|
| Internet (e.g. WebMD , NHS choices) | <input type="checkbox"/> | <input type="checkbox"/> | <input type="checkbox"/> | <input type="checkbox"/> | <input type="checkbox"/> | <input type="checkbox"/> | <input type="checkbox"/> |
| NHS 111 COVID-19 phone line         | <input type="checkbox"/> | <input type="checkbox"/> | <input type="checkbox"/> | <input type="checkbox"/> | <input type="checkbox"/> | <input type="checkbox"/> | <input type="checkbox"/> |
| NHS 111 COVID-19 website            | <input type="checkbox"/> | <input type="checkbox"/> | <input type="checkbox"/> | <input type="checkbox"/> | <input type="checkbox"/> | <input type="checkbox"/> | <input type="checkbox"/> |
| Pharmacist                          | <input type="checkbox"/> | <input type="checkbox"/> | <input type="checkbox"/> | <input type="checkbox"/> | <input type="checkbox"/> | <input type="checkbox"/> | <input type="checkbox"/> |
| GP (by phone)                       | <input type="checkbox"/> | <input type="checkbox"/> | <input type="checkbox"/> | <input type="checkbox"/> | <input type="checkbox"/> | <input type="checkbox"/> | <input type="checkbox"/> |
| GP (visit to practice)              | <input type="checkbox"/> | <input type="checkbox"/> | <input type="checkbox"/> | <input type="checkbox"/> | <input type="checkbox"/> | <input type="checkbox"/> | <input type="checkbox"/> |
| GP (online (including video))       | <input type="checkbox"/> | <input type="checkbox"/> | <input type="checkbox"/> | <input type="checkbox"/> | <input type="checkbox"/> | <input type="checkbox"/> | <input type="checkbox"/> |
| Walk-in centre                      | <input type="checkbox"/> | <input type="checkbox"/> | <input type="checkbox"/> | <input type="checkbox"/> | <input type="checkbox"/> | <input type="checkbox"/> | <input type="checkbox"/> |
| COVID-19 testing centre             | <input type="checkbox"/> | <input type="checkbox"/> | <input type="checkbox"/> | <input type="checkbox"/> | <input type="checkbox"/> | <input type="checkbox"/> | <input type="checkbox"/> |
| A&E                                 | <input type="checkbox"/> | <input type="checkbox"/> | <input type="checkbox"/> | <input type="checkbox"/> | <input type="checkbox"/> | <input type="checkbox"/> | <input type="checkbox"/> |
| Hospital                            | <input type="checkbox"/> | <input type="checkbox"/> | <input type="checkbox"/> | <input type="checkbox"/> | <input type="checkbox"/> | <input type="checkbox"/> | <input type="checkbox"/> |



**Medication - [go\_arm\_1][hh1\_fname] [go\_arm\_1][hh1\_sname]**

[go\_arm\_1][hh1\_fname] [go\_arm\_1][hh1\_sname]: Did your symptoms lead to taking any medicines during the survey week?  Yes  No

This includes prescribed medicines, medicine brought at the chemist or shops, or vitamin supplements

On which days did you take the medicines:  
Please select all that apply

|                                                         | Mon                      | Tues                     | Wed                      | Thurs                    | Fri                      | Sat                      | Sun                      |
|---------------------------------------------------------|--------------------------|--------------------------|--------------------------|--------------------------|--------------------------|--------------------------|--------------------------|
| Paracetamol                                             | <input type="checkbox"/> | <input type="checkbox"/> | <input type="checkbox"/> | <input type="checkbox"/> | <input type="checkbox"/> | <input type="checkbox"/> | <input type="checkbox"/> |
| Ibuprofen, nurofen, diclofenac, naproxen or other NSAID | <input type="checkbox"/> | <input type="checkbox"/> | <input type="checkbox"/> | <input type="checkbox"/> | <input type="checkbox"/> | <input type="checkbox"/> | <input type="checkbox"/> |
| Aspirin                                                 | <input type="checkbox"/> | <input type="checkbox"/> | <input type="checkbox"/> | <input type="checkbox"/> | <input type="checkbox"/> | <input type="checkbox"/> | <input type="checkbox"/> |
| Antibiotics                                             | <input type="checkbox"/> | <input type="checkbox"/> | <input type="checkbox"/> | <input type="checkbox"/> | <input type="checkbox"/> | <input type="checkbox"/> | <input type="checkbox"/> |
| Cold or flu remedies - over the counter                 | <input type="checkbox"/> | <input type="checkbox"/> | <input type="checkbox"/> | <input type="checkbox"/> | <input type="checkbox"/> | <input type="checkbox"/> | <input type="checkbox"/> |
| Vitamin Supplements                                     | <input type="checkbox"/> | <input type="checkbox"/> | <input type="checkbox"/> | <input type="checkbox"/> | <input type="checkbox"/> | <input type="checkbox"/> | <input type="checkbox"/> |
| Other (please describe)                                 | <input type="checkbox"/> | <input type="checkbox"/> | <input type="checkbox"/> | <input type="checkbox"/> | <input type="checkbox"/> | <input type="checkbox"/> | <input type="checkbox"/> |

Please specify:

\_\_\_\_\_

For peer review only

**Isolation and Infection Control - [go\_arm\_1][hh1\_fname]**

[go\_arm\_1][hh1\_fname] [go\_arm\_1][hh1\_sname]: During the past week, on which days did you:

|                                                        | Mon                      | Tues                     | Wed                      | Thurs                    | Fri                      | Sat                      | Sun                      | None                     |
|--------------------------------------------------------|--------------------------|--------------------------|--------------------------|--------------------------|--------------------------|--------------------------|--------------------------|--------------------------|
| Leave the house/flat or garden                         | <input type="checkbox"/> | <input type="checkbox"/> | <input type="checkbox"/> | <input type="checkbox"/> | <input type="checkbox"/> | <input type="checkbox"/> | <input type="checkbox"/> | <input type="checkbox"/> |
| Wear a facemask or face covering outside the home      | <input type="checkbox"/> | <input type="checkbox"/> | <input type="checkbox"/> | <input type="checkbox"/> | <input type="checkbox"/> | <input type="checkbox"/> | <input type="checkbox"/> | <input type="checkbox"/> |
| Sleep in a room with no one else in it?                | <input type="checkbox"/> | <input type="checkbox"/> | <input type="checkbox"/> | <input type="checkbox"/> | <input type="checkbox"/> | <input type="checkbox"/> | <input type="checkbox"/> | <input type="checkbox"/> |
| Wear a face mask or face covering at home?             | <input type="checkbox"/> | <input type="checkbox"/> | <input type="checkbox"/> | <input type="checkbox"/> | <input type="checkbox"/> | <input type="checkbox"/> | <input type="checkbox"/> | <input type="checkbox"/> |
| Have a meal with other members of your household?      | <input type="checkbox"/> | <input type="checkbox"/> | <input type="checkbox"/> | <input type="checkbox"/> | <input type="checkbox"/> | <input type="checkbox"/> | <input type="checkbox"/> | <input type="checkbox"/> |
| Watch television with other members of your household? | <input type="checkbox"/> | <input type="checkbox"/> | <input type="checkbox"/> | <input type="checkbox"/> | <input type="checkbox"/> | <input type="checkbox"/> | <input type="checkbox"/> | <input type="checkbox"/> |

[go\_arm\_1][hh1\_fname] [go\_arm\_1][hh1\_sname]: During your illness, what best describes your approach to preventing spread of infection in the household?

- I did not think my illness was COVID-19, so I did not take any special precautions  
 I thought it would spread whatever I did so did not take special precautions  
 I was worried about the illness spreading to others in the household so did what I could to stop this  
 None of the above

[go\_arm\_1][hh1\_fname] [go\_arm\_1][hh1\_sname]: Since your illness started, on which days did OTHER MEMBERS OF YOUR HOUSEHOLD:

|                                                                | Mon                      | Tues                     | Wed                      | Thur                     | Fri                      | Sat                      | Sun                      | None                     |
|----------------------------------------------------------------|--------------------------|--------------------------|--------------------------|--------------------------|--------------------------|--------------------------|--------------------------|--------------------------|
| Wear a face mask or face covering when in the same room as you | <input type="checkbox"/> | <input type="checkbox"/> | <input type="checkbox"/> | <input type="checkbox"/> | <input type="checkbox"/> | <input type="checkbox"/> | <input type="checkbox"/> | <input type="checkbox"/> |
| Leave the house/flat or garden at all                          | <input type="checkbox"/> | <input type="checkbox"/> | <input type="checkbox"/> | <input type="checkbox"/> | <input type="checkbox"/> | <input type="checkbox"/> | <input type="checkbox"/> | <input type="checkbox"/> |
| Go to work                                                     | <input type="checkbox"/> | <input type="checkbox"/> | <input type="checkbox"/> | <input type="checkbox"/> | <input type="checkbox"/> | <input type="checkbox"/> | <input type="checkbox"/> | <input type="checkbox"/> |
| Wear a facemask or face covering outside the home              | <input type="checkbox"/> | <input type="checkbox"/> | <input type="checkbox"/> | <input type="checkbox"/> | <input type="checkbox"/> | <input type="checkbox"/> | <input type="checkbox"/> | <input type="checkbox"/> |

[go\_arm\_1][hh1\_fname] [go\_arm\_1][hh1\_sname]: Why did other household members leave the house?  
Please select all that apply

- They did not think my symptoms were related to COVID-19  
 They did not think there was any need for people without symptoms to stay at home  
 They needed to go out to earn money  
 They needed to go out to an important meeting  
 Other reason

1 During your illness, how frequently have you washed  
2 your hands thoroughly and regularly with soap and  
3 water  
4  
5  
6  
7  
8  
9  
10  
11  
12  
13

Not at all  
 1 or 2 times a day  
 3 or 4 times a day  
 5 or 6 times a day  
 7 or 8 times a day  
 9 or 10 times a day  
 More than 10 times a day

9 During your illness, on average, how frequently have  
10 you (or someone else) disinfected surfaces you might  
11 touch?  
12 Such as door knobs or hard surfaces  
13

Several times a day  
 Daily  
 Less than daily  
 Never

14 [go\_arm\_1][hh1\_fname] [go\_arm\_1][hh1\_sname]: During your illness, how frequently have you:

|                                                                                | Not applicable        | Almost always         | Most of the time      | Sometimes             | Rarely                | Never                 |
|--------------------------------------------------------------------------------|-----------------------|-----------------------|-----------------------|-----------------------|-----------------------|-----------------------|
| 19 Washed your hands after<br>20 blowing your nose, sneezing or<br>21 coughing | <input type="radio"/> | <input type="radio"/> | <input type="radio"/> | <input type="radio"/> | <input type="radio"/> | <input type="radio"/> |
| 22 Used tissues when sneezing or<br>23 coughing                                | <input type="radio"/> | <input type="radio"/> | <input type="radio"/> | <input type="radio"/> | <input type="radio"/> | <input type="radio"/> |
| 24 Put tissues in the bin<br>25 immediately after use                          | <input type="radio"/> | <input type="radio"/> | <input type="radio"/> | <input type="radio"/> | <input type="radio"/> | <input type="radio"/> |

For peer review only

1 **Thank You**

2  
3 Please click submit to continue  
4  
5  
6  
7  
8  
9  
10  
11  
12  
13  
14  
15  
16  
17  
18  
19  
20  
21  
22  
23  
24  
25  
26  
27  
28  
29  
30  
31  
32  
33  
34  
35  
36  
37  
38  
39  
40  
41  
42  
43  
44  
45  
46  
47  
48  
49  
50  
51  
52  
53  
54  
55  
56  
57  
58  
59  
60

For peer review only
