# Supplementary material for: Risk factors, symptom reporting, healthcare-seeking behaviour and adherence to public health guidance: protocol for Virus Watch, a prospective community cohort study
Source: PubMed Central journal article supplement (PMC8230990; doi:10.1136/bmjopen-2020-048042), 2021-06-23
Supplement: bmjopen-2020-048042supp003.pdf [file bmjopen-2020-048042supp003.pdf]

Confidential

Page 1

# Weekly Survey

## Welcome to the weekly followup survey

surveydate \_\_\_\_\_

In Virus Watch we are interested in the following types of symptoms:

General symptoms (e.g. fevers, general muscle aches, headache, joint pain, extreme tiredness, trouble with daily activities around the house) Respiratory Symptoms (e.g. cough, shortness of breath, earache, sore throat, runny nose, blocked nose, sneezing, wheeze, loss or altered senses of smell or taste). Eyes (e.g. eye redness, eye pain, sticky eye, deterioration of eyesight) Rashes Digestive symptoms (e.g. diarrhoea or loose stools, vomiting, nausea, abdominal pain) This survey is about symptoms in the week (Monday to Sunday) before you received the email with the survey link.

Download Symptom Diary

[Attachment: "Virus\_Watch\_Symptom\_Diary.pdf"]

Have you or anyone in the household had any of these symptoms in the past week?  Yes  No

Please continue to report weekly symptoms even if you believe them to be related to a recent vaccine you have had.

Did any household members receive a COVID-19 test result in the past week?  Yes  No

Has anyone in the household been advised to self-isolate in the past week?  Yes  No

Please indicate who received a result for a COVID-19 (swab or lateral flow) test in the past week: If you have had multiple tests this week please report any positive test dates OR your last negative test dates (if all were negative)

[go\_arm\_1][hh1\_fname] [go\_arm\_1][hh1\_sname]

[go\_arm\_1][hh1\_fname] [go\_arm\_1][hh1\_sname]: What was the result of the COVID-19 test?  Positive  Negative  Unclear

[go\_arm\_1][hh1\_fname] [go\_arm\_1][hh1\_sname]: When was the test taken? \_\_\_\_\_

[go\_arm\_1][hh1\_fname] [go\_arm\_1][hh1\_sname]: When did you receive the test result? \_\_\_\_\_

[go\_arm\_1][hh2\_fname] [go\_arm\_1][hh2\_sname]

[go\_arm\_1][hh2\_fname] [go\_arm\_1][hh2\_sname]: What was the result of the COVID-19 test?  Positive  Negative  Unclear

[go\_arm\_1][hh2\_fname] [go\_arm\_1][hh2\_sname]: When was the test taken? \_\_\_\_\_

Confidential

Page 2

---

[go\_arm\_1][hh2\_fname] [go\_arm\_1][hh2\_sname]: When did you receive the test result? \_\_\_\_\_

---

[go\_arm\_1][hh3\_fname] [go\_arm\_1][hh3\_sname]

---

[go\_arm\_1][hh3\_fname] [go\_arm\_1][hh3\_sname]: What was the result of the COVID-19 test?  Positive  
 Negative  
 Unclear

---

[go\_arm\_1][hh3\_fname] [go\_arm\_1][hh3\_sname]: When was the test taken? \_\_\_\_\_

---

[go\_arm\_1][hh3\_fname] [go\_arm\_1][hh3\_sname]: When did you receive the test result? \_\_\_\_\_

---

[go\_arm\_1][hh4\_fname] [go\_arm\_1][hh4\_sname]

---

[go\_arm\_1][hh4\_fname] [go\_arm\_1][hh4\_sname]: What was the result of the COVID-19 test?  Positive  
 Negative  
 Unclear

---

[go\_arm\_1][hh4\_fname] [go\_arm\_1][hh4\_sname]: When was the test taken? \_\_\_\_\_

---

[go\_arm\_1][hh4\_fname] [go\_arm\_1][hh4\_sname]: When did you receive the test result? \_\_\_\_\_

---

[go\_arm\_1][hh5\_fname] [go\_arm\_1][hh5\_sname]

---

[go\_arm\_1][hh5\_fname] [go\_arm\_1][hh5\_sname]: What was the result of the COVID-19 test?  Positive  
 Negative  
 Unclear

---

[go\_arm\_1][hh5\_fname] [go\_arm\_1][hh5\_sname]: When was the test taken? \_\_\_\_\_

---

[go\_arm\_1][hh5\_fname] [go\_arm\_1][hh5\_sname]: When did you receive the test result? \_\_\_\_\_

---

[go\_arm\_1][hh6\_fname] [go\_arm\_1][hh6\_sname]

---

[go\_arm\_1][hh6\_fname] [go\_arm\_1][hh6\_sname]: What was the result of the COVID-19 test?  Positive  
 Negative  
 Unclear

---

[go\_arm\_1][hh6\_fname] [go\_arm\_1][hh6\_sname]: When was the test taken? \_\_\_\_\_

---

[go\_arm\_1][hh6\_fname] [go\_arm\_1][hh6\_sname]: When did you receive the test result? \_\_\_\_\_

---

Please indicate who was advised to self isolate in the past week:

---

[go\_arm\_1][hh1\_fname] [go\_arm\_1][hh1\_sname]

Confidential

Page 3

---

[go\_arm\_1][hh1\_fname] [go\_arm\_1][hh1\_sname]: Which of the following led to the request to self-isolate?

- The Test and Trace programme advised me to self-isolate because I have symptoms of COVID-19
- The Test and Trace programme advised me to self-isolate because I am had a positive test result
- The Test and Trace programme advised me to self isolate because I was in contact with a COVID-19 case
- The NHS COVID-19 app alerted me that I had been in contact with a COVID-19 case
- I have returned from a country where quarantine is advised after return.
- Other reason

---

[go\_arm\_1][hh2\_fname] [go\_arm\_1][hh2\_sname]

---

[go\_arm\_1][hh2\_fname] [go\_arm\_1][hh2\_sname]: Which of the following led to the request to self-isolate?

- The Test and Trace programme advised me to self-isolate because I have symptoms of COVID-19
- The Test and Trace programme advised me to self-isolate because I am had a positive test result
- The Test and Trace programme advised me to self isolate because I was in contact with a COVID-19 case
- The NHS COVID-19 app alerted me that I had been in contact with a COVID-19 case
- I have returned from a country where quarantine is advised after return.
- Other reason

---

[go\_arm\_1][hh3\_fname] [go\_arm\_1][hh3\_sname]

---

[go\_arm\_1][hh3\_fname] [go\_arm\_1][hh3\_sname]: Which of the following led to the request to self-isolate?

- The Test and Trace programme advised me to self-isolate because I have symptoms of COVID-19
- The Test and Trace programme advised me to self-isolate because I am had a positive test result
- The Test and Trace programme advised me to self isolate because I was in contact with a COVID-19 case
- The NHS COVID-19 app alerted me that I had been in contact with a COVID-19 case
- I have returned from a country where quarantine is advised after return.
- Other reason

---

[go\_arm\_1][hh4\_fname] [go\_arm\_1][hh4\_sname]

Confidential

Page 4

[go\_arm\_1][hh4\_fname] [go\_arm\_1][hh4\_sname]: Which of the following led to the request to self-isolate?

- The Test and Trace programme advised me to self-isolate because I have symptoms of COVID-19
- The Test and Trace programme advised me to self-isolate because I am had a positive test result
- The Test and Trace programme advised me to self isolate because I was in contact with a COVID-19 case
- The NHS COVID-19 app alerted me that I had been in contact with a COVID-19 case
- I have returned from a country where quarantine is advised after return.
- Other reason

[go\_arm\_1][hh5\_fname] [go\_arm\_1][hh5\_sname]

[go\_arm\_1][hh5\_fname] [go\_arm\_1][hh5\_sname]: Which of the following led to the request to self-isolate?

- The Test and Trace programme advised me to self-isolate because I have symptoms of COVID-19
- The Test and Trace programme advised me to self-isolate because I am had a positive test result
- The Test and Trace programme advised me to self isolate because I was in contact with a COVID-19 case
- The NHS COVID-19 app alerted me that I had been in contact with a COVID-19 case
- I have returned from a country where quarantine is advised after return.
- Other reason

[go\_arm\_1][hh6\_fname] [go\_arm\_1][hh6\_sname]

[go\_arm\_1][hh6\_fname] [go\_arm\_1][hh6\_sname]: Which of the following led to the request to self-isolate?

- The Test and Trace programme advised me to self-isolate because I have symptoms of COVID-19
- The Test and Trace programme advised me to self-isolate because I am had a positive test result
- The Test and Trace programme advised me to self isolate because I was in contact with a COVID-19 case
- The NHS COVID-19 app alerted me that I had been in contact with a COVID-19 case
- I have returned from a country where quarantine is advised after return.
- Other reason

Please indicate who has had symptoms in the past week:

[go\_arm\_1][hh1\_fname] [go\_arm\_1][hh1\_sname]:

- Yes, symptoms that have been present for less than 2 months
- Yes, symptoms that developed after a COVID-19 like illness and have lasted for more than 2 months
- Yes, symptoms that are part of a long term chronic illness
- No symptoms

Confidential

Page 5

[go\_arm\_1][hh2\_fname] [go\_arm\_1][hh2\_sname]:

- Yes, symptoms that have been present for less than 2 months
- Yes, symptoms that developed after a COVID-19 like illness and have lasted for more than 2 months
- Yes, symptoms that are part of a long term chronic illness
- No symptoms

[go\_arm\_1][hh3\_fname] [go\_arm\_1][hh3\_sname]:

- Yes, symptoms that have been present for less than 2 months
- Yes, symptoms that developed after a COVID-19 like illness and have lasted for more than 2 months
- Yes, symptoms that are part of a long term chronic illness
- No symptoms

[go\_arm\_1][hh4\_fname] [go\_arm\_1][hh4\_sname]:

- Yes, symptoms that have been present for less than 2 months
- Yes, symptoms that developed after a COVID-19 like illness and have lasted for more than 2 months
- Yes, symptoms that are part of a long term chronic illness
- No symptoms

[go\_arm\_1][hh5\_fname] [go\_arm\_1][hh5\_sname]:

- Yes, symptoms that have been present for less than 2 months
- Yes, symptoms that developed after a COVID-19 like illness and have lasted for more than 2 months
- Yes, symptoms that are part of a long term chronic illness
- No symptoms

[go\_arm\_1][hh6\_fname] [go\_arm\_1][hh6\_sname]:

- Yes, symptoms that have been present for less than 2 months
- Yes, symptoms that developed after a COVID-19 like illness and have lasted for more than 2 months
- Yes, symptoms that are part of a long term chronic illness
- No symptoms

Please indicate whether the following members have received a result for a COVID-19 (swab or lateral flow) test in the past week: If you have had multiple tests this week please report any positive test dates OR your last negative test dates (if all were negative)

[go\_arm\_1][hh1\_fname] [go\_arm\_1][hh1\_sname]:

[go\_arm\_1][hh1\_fname] [go\_arm\_1][hh1\_sname]: What was the result of this test?

- Positive
- Negative
- Unclear

[go\_arm\_1][hh1\_fname] [go\_arm\_1][hh1\_sname]: When was the test taken? \_\_\_\_\_

[go\_arm\_1][hh1\_fname] [go\_arm\_1][hh1\_sname]: When did you receive the test result? \_\_\_\_\_

[go\_arm\_1][hh2\_fname] [go\_arm\_1][hh2\_sname]:

Confidential

Page 6

---

[go\_arm\_1][hh2\_fname] [go\_arm\_1][hh2\_sname]: What was the result of this test?  Positive  
 Negative  
 Unclear

---

[go\_arm\_1][hh2\_fname] [go\_arm\_1][hh2\_sname]: When was the test taken? \_\_\_\_\_

---

[go\_arm\_1][hh2\_fname] [go\_arm\_1][hh2\_sname]: When did you receive the test result? \_\_\_\_\_

---

[go\_arm\_1][hh3\_fname] [go\_arm\_1][hh3\_sname]:

---

[go\_arm\_1][hh3\_fname] [go\_arm\_1][hh3\_sname]: What was the result of this test?  Positive  
 Negative  
 Unclear

---

[go\_arm\_1][hh3\_fname] [go\_arm\_1][hh3\_sname]: When was the test taken? \_\_\_\_\_

---

[go\_arm\_1][hh3\_fname] [go\_arm\_1][hh3\_sname]: When did you receive the test result? \_\_\_\_\_

---

[go\_arm\_1][hh4\_fname] [go\_arm\_1][hh4\_sname]:

---

[go\_arm\_1][hh4\_fname] [go\_arm\_1][hh4\_sname]: What was the result of this test?  Positive  
 Negative  
 Unclear

---

[go\_arm\_1][hh4\_fname] [go\_arm\_1][hh4\_sname]: When was the test taken? \_\_\_\_\_

---

[go\_arm\_1][hh4\_fname] [go\_arm\_1][hh4\_sname]: When did you receive the test result? \_\_\_\_\_

---

[go\_arm\_1][hh5\_fname] [go\_arm\_1][hh5\_sname]:

---

[go\_arm\_1][hh5\_fname] [go\_arm\_1][hh5\_sname]: What was the result of this test?  Positive  
 Negative  
 Unclear

---

[go\_arm\_1][hh5\_fname] [go\_arm\_1][hh5\_sname]: When was the test taken? \_\_\_\_\_

---

[go\_arm\_1][hh5\_fname] [go\_arm\_1][hh5\_sname]: When did you receive the test result? \_\_\_\_\_

---

[go\_arm\_1][hh6\_fname] [go\_arm\_1][hh6\_sname]:

---

[go\_arm\_1][hh6\_fname] [go\_arm\_1][hh6\_sname]: What was the result of this test?  Positive  
 Negative  
 Unclear

---

[go\_arm\_1][hh6\_fname] [go\_arm\_1][hh6\_sname]: When was the test taken? \_\_\_\_\_

Confidential

Page 7

[go\_arm\_1][hh6\_fname] [go\_arm\_1][hh6\_sname]: When did you receive the test result? \_\_\_\_\_

Please indicate whether the following household members been advised to self-isolate in the past week:

[go\_arm\_1][hh1\_fname] [go\_arm\_1][hh1\_sname]

[go\_arm\_1][hh1\_fname] [go\_arm\_1][hh1\_sname]: Which of the following led to the request to self-isolate?

- The Test and Trace programme advised me to self-isolate because I have symptoms of COVID-19
- The Test and Trace programme advised me to self-isolate because I am had a positive test result
- The Test and Trace programme advised me to self isolate because I was in contact with a COVID-19 case
- The NHS COVID-19 app alerted me that I had been in contact with a COVID-19 case
- I have returned from a country where quarantine is advised after return.
- Other reason

[go\_arm\_1][hh2\_fname] [go\_arm\_1][hh2\_sname]

[go\_arm\_1][hh2\_fname] [go\_arm\_1][hh2\_sname]: Which of the following led to the request to self-isolate?

- The Test and Trace programme advised me to self-isolate because I have symptoms of COVID-19
- The Test and Trace programme advised me to self-isolate because I am had a positive test result
- The Test and Trace programme advised me to self isolate because I was in contact with a COVID-19 case
- The NHS COVID-19 app alerted me that I had been in contact with a COVID-19 case
- I have returned from a country where quarantine is advised after return.
- Other reason

[go\_arm\_1][hh3\_fname] [go\_arm\_1][hh3\_sname]

[go\_arm\_1][hh3\_fname] [go\_arm\_1][hh3\_sname]: Which of the following led to the request to self-isolate?

- The Test and Trace programme advised me to self-isolate because I have symptoms of COVID-19
- The Test and Trace programme advised me to self-isolate because I am had a positive test result
- The Test and Trace programme advised me to self isolate because I was in contact with a COVID-19 case
- The NHS COVID-19 app alerted me that I had been in contact with a COVID-19 case
- I have returned from a country where quarantine is advised after return.
- Other reason

[go\_arm\_1][hh4\_fname] [go\_arm\_1][hh4\_sname]

Confidential

Page 8

---

[go\_arm\_1][hh4\_fname] [go\_arm\_1][hh4\_sname]: Which of the following led to the request to self-isolate?

- The Test and Trace programme advised me to self-isolate because I have symptoms of COVID-19
- The Test and Trace programme advised me to self-isolate because I am had a positive test result
- The Test and Trace programme advised me to self isolate because I was in contact with a COVID-19 case
- The NHS COVID-19 app alerted me that I had been in contact with a COVID-19 case
- I have returned from a country where quarantine is advised after return.
- Other reason

---

[go\_arm\_1][hh5\_fname] [go\_arm\_1][hh5\_sname]

---

[go\_arm\_1][hh5\_fname] [go\_arm\_1][hh5\_sname]: Which of the following led to the request to self-isolate?

- The Test and Trace programme advised me to self-isolate because I have symptoms of COVID-19
- The Test and Trace programme advised me to self-isolate because I am had a positive test result
- The Test and Trace programme advised me to self isolate because I was in contact with a COVID-19 case
- The NHS COVID-19 app alerted me that I had been in contact with a COVID-19 case
- I have returned from a country where quarantine is advised after return.
- Other reason

---

[go\_arm\_1][hh6\_fname] [go\_arm\_1][hh6\_sname]

---

[go\_arm\_1][hh6\_fname] [go\_arm\_1][hh6\_sname]: Which of the following led to the request to self-isolate?

- The Test and Trace programme advised me to self-isolate because I have symptoms of COVID-19
- The Test and Trace programme advised me to self-isolate because I am had a positive test result
- The Test and Trace programme advised me to self isolate because I was in contact with a COVID-19 case
- The NHS COVID-19 app alerted me that I had been in contact with a COVID-19 case
- I have returned from a country where quarantine is advised after return.
- Other reason



Confidential

Page 9

**Vaccination**

Has anyone in the household received a COVID-19 vaccine in the past week?

- Yes  
 No  
 Unsure (e.g. as part of a blinded COVID-19 trial)

Please indicate who received a COVID-19 vaccine:

[go\_arm\_1][hh1\_fname] [go\_arm\_1][hh1\_sname]

[go\_arm\_1][hh1\_fname] [go\_arm\_1][hh1\_sname]: Please select which dose(s) of the COVID-19 vaccine you received?

1st Dose  
 2nd Dose

[go\_arm\_1][hh1\_fname] [go\_arm\_1][hh1\_sname]: Which type of vaccine did you receive as the 1st dose?

Pfizer Biontech vaccine  
 Oxford AstraZeneca vaccine  
 Other vaccine  
 Don't know/Don't remember

[go\_arm\_1][hh1\_fname] [go\_arm\_1][hh1\_sname]: What date did you receive the 1st dose? (dd-mm-yyyy) \_\_\_\_\_

Please provide an estimate if you cannot recall the date

[go\_arm\_1][hh1\_fname] [go\_arm\_1][hh1\_sname]: Which type of vaccine did you receive as the 2nd dose?

Pfizer Biontech vaccine  
 Oxford AstraZeneca vaccine  
 Other vaccine  
 Don't know/Don't remember

[go\_arm\_1][hh1\_fname] [go\_arm\_1][hh1\_sname]: What date did you receive the 2nd dose? (dd-mm-yyyy) \_\_\_\_\_

Please provide an estimate if you cannot recall the date

[go\_arm\_1][hh2\_fname] [go\_arm\_1][hh2\_sname]

[go\_arm\_1][hh2\_fname] [go\_arm\_1][hh2\_sname]: Please select which dose(s) of the COVID-19 vaccine you received?

1st Dose  
 2nd Dose

[go\_arm\_1][hh2\_fname] [go\_arm\_1][hh2\_sname]: Which type of vaccine did you receive as the 1st dose?

Pfizer Biontech vaccine  
 Oxford AstraZeneca vaccine  
 Other vaccine  
 Don't know/Don't remember

[go\_arm\_1][hh2\_fname] [go\_arm\_1][hh2\_sname]: What date did you receive the 1st dose? (dd-mm-yyyy) \_\_\_\_\_

Please provide an estimate if you cannot recall the date

Confidential

Page 10

---

[go\_arm\_1][hh2\_fname] [go\_arm\_1][hh2\_sname]: Which type of vaccine did you receive as the 2nd dose?

- Pfizer Biontech vaccine  
 Oxford AstraZeneca vaccine  
 Other vaccine  
 Don't know/Don't remember

---

[go\_arm\_1][hh2\_fname] [go\_arm\_1][hh2\_sname]: What date did you receive the 2nd dose? (dd-mm-yyyy) \_\_\_\_\_

Please provide an estimate if you cannot recall the date

---

[go\_arm\_1][hh3\_fname] [go\_arm\_1][hh3\_sname]

---

[go\_arm\_1][hh3\_fname] [go\_arm\_1][hh3\_sname]: Please select which dose(s) of the COVID-19 vaccine you received?

- 1st Dose  
 2nd Dose

---

[go\_arm\_1][hh3\_fname] [go\_arm\_1][hh3\_sname]: Which type of vaccine did you receive as the 1st dose?

- Pfizer Biontech vaccine  
 Oxford AstraZeneca vaccine  
 Other vaccine  
 Don't know/Don't remember

---

[go\_arm\_1][hh3\_fname] [go\_arm\_1][hh3\_sname]: What date did you receive the 1st dose? (dd-mm-yyyy) \_\_\_\_\_

Please provide an estimate if you cannot recall the date

---

[go\_arm\_1][hh3\_fname] [go\_arm\_1][hh3\_sname]: Which type of vaccine did you receive as the 2nd dose?

- Pfizer Biontech vaccine  
 Oxford AstraZeneca vaccine  
 Other vaccine  
 Don't know/Don't remember

---

[go\_arm\_1][hh3\_fname] [go\_arm\_1][hh3\_sname]: What date did you receive the 2nd dose? (dd-mm-yyyy) \_\_\_\_\_

Please provide an estimate if you cannot recall the date

---

[go\_arm\_1][hh4\_fname] [go\_arm\_1][hh4\_sname]

---

[go\_arm\_1][hh4\_fname] [go\_arm\_1][hh4\_sname]: Please select which dose(s) of the COVID-19 vaccine you received?

- 1st Dose  
 2nd Dose

---

[go\_arm\_1][hh4\_fname] [go\_arm\_1][hh4\_sname]: Which type of vaccine did you receive as the 1st dose?

- Pfizer Biontech vaccine  
 Oxford AstraZeneca vaccine  
 Other vaccine  
 Don't know/Don't remember

---

[go\_arm\_1][hh4\_fname] [go\_arm\_1][hh4\_sname]: What date did you receive the 1st dose? (dd-mm-yyyy) \_\_\_\_\_

Please provide an estimate if you cannot recall the date

Confidential

Page 11

---

[go\_arm\_1][hh4\_fname] [go\_arm\_1][hh4\_sname]: Which type of vaccine did you receive as the 2nd dose?

- Pfizer Biontech vaccine  
 Oxford AstraZeneca vaccine  
 Other vaccine  
 Don't know/Don't remember

---

[go\_arm\_1][hh4\_fname] [go\_arm\_1][hh4\_sname]: What date did you receive the 2nd dose? (dd-mm-yyyy) \_\_\_\_\_

Please provide an estimate if you cannot recall the date

---

[go\_arm\_1][hh5\_fname] [go\_arm\_1][hh5\_sname]

---

[go\_arm\_1][hh5\_fname] [go\_arm\_1][hh5\_sname]: Please select which dose(s) of the COVID-19 vaccine you received?

- 1st Dose  
 2nd Dose

---

[go\_arm\_1][hh5\_fname] [go\_arm\_1][hh5\_sname]: Which type of vaccine did you receive as the 1st dose?

- Pfizer Biontech vaccine  
 Oxford AstraZeneca vaccine  
 Other vaccine  
 Don't know/Don't remember

---

[go\_arm\_1][hh5\_fname] [go\_arm\_1][hh5\_sname]: What date did you receive the 1st dose? (dd-mm-yyyy) \_\_\_\_\_

Please provide an estimate if you cannot recall the date

---

[go\_arm\_1][hh5\_fname] [go\_arm\_1][hh5\_sname]: Which type of vaccine did you receive as the 2nd dose?

- Pfizer Biontech vaccine  
 Oxford AstraZeneca vaccine  
 Other vaccine  
 Don't know/Don't remember

---

[go\_arm\_1][hh5\_fname] [go\_arm\_1][hh5\_sname]: What date did you receive the 2nd dose? (dd-mm-yyyy) \_\_\_\_\_

Please provide an estimate if you cannot recall the date

---

[go\_arm\_1][hh6\_fname] [go\_arm\_1][hh6\_sname]

---

[go\_arm\_1][hh6\_fname] [go\_arm\_1][hh6\_sname]: Please select which dose(s) of the COVID-19 vaccine you received?

- 1st Dose  
 2nd Dose

---

[go\_arm\_1][hh6\_fname] [go\_arm\_1][hh6\_sname]: Which type of vaccine did you receive as the 1st dose?

- Pfizer Biontech vaccine  
 Oxford AstraZeneca vaccine  
 Other vaccine  
 Don't know/Don't remember

---

[go\_arm\_1][hh6\_fname] [go\_arm\_1][hh6\_sname]: What date did you receive the 1st dose? (dd-mm-yyyy) \_\_\_\_\_

Please provide an estimate if you cannot recall the date

Confidential

Page 12

---

[go\_arm\_1][hh6\_fname] [go\_arm\_1][hh6\_sname]: Which type of vaccine did you receive as the 2nd dose?

- Pfizer Biontech vaccine  
 Oxford AstraZeneca vaccine  
 Other vaccine  
 Don't know/Don't remember

---

[go\_arm\_1][hh6\_fname] [go\_arm\_1][hh6\_sname]: What date did you receive the 2nd dose? (dd-mm-yyyy) \_\_\_\_\_

Please provide an estimate if you cannot recall the date

---

Thank you for letting us know that someone in your household has been ill. We hope they feel better soon. Please always follow NHS and Public Health advice when someone is ill. We will always have a link to the latest COVID-19 advice on the Virus Watch Website.

If anyone has new symptoms to report, the following survey will ask about any illness and related health care as well as asking about isolation, time off work, measures to help stop infections spreading and activities that household members have done in the last week.

The survey usually takes about 10 minutes to complete for each member of the household who has been ill.

---

Thank you for completing the survey - we will be in touch again next week.
