# Supplementary material for: Risk factors, symptom reporting, healthcare-seeking behaviour and adherence to public health guidance: protocol for Virus Watch, a prospective community cohort study
Source: PubMed Central journal article supplement (PMC8230990; doi:10.1136/bmjopen-2020-048042), 2021-06-23
Supplement: bmjopen-2020-048042supp004.pdf [file bmjopen-2020-048042supp004.pdf]

Confidential

Page 1

**Wkhh1****Symptoms - [go\_arm\_1][hh1\_fname] [go\_arm\_1][hh1\_sname]**

The following sections are about the symptoms, use of treatments and access of medical services in the past week (the Monday-Sunday before you received the email with this survey link).

[go\_arm\_1][hh1\_fname]: What parts of the body did your symptoms affect?  
Select all that apply

- General symptoms (fevers, general muscle aches, headache, joint pain, extreme tiredness, trouble with daily activities around the house)
- Respiratory Symptoms (e.g. cough, shortness of breath, earache, sore throat, runny nose, blocked nose, sneezing, wheeze, loss or altered senses of smell or taste)
- Eyes (e.g. eye redness, eye pain, sticky eye, deterioration of eyesight)
- Rash
- Digestive symptoms (e.g. diarrhoea or loose stools, vomiting, nausea, abdominal pain)

[go\_arm\_1][hh1\_fname] [go\_arm\_1][hh1\_sname]: Which days did you have symptoms?  
Please check all days that you had any of the above symptoms.

- Monday
- Tuesday
- Wednesday
- Thursday
- Friday
- Saturday
- Sunday

Confidential

Page 2

**General symptoms - [go\_arm\_1][hh1\_fname] [go\_arm\_1][hh1\_sname]**

[go\_arm\_1][hh1\_fname] [go\_arm\_1][hh1\_sname]: Which of these general symptoms did you have?  
Select all that apply

- Fever
- Feeling Feverish
- Chills and shakes
- Night Sweats
- Muscle Aches
- Bone or Joint Aches
- Loss of Appetite
- Headache
- Lack of concentration
- Lightheaded or dizzy
- Not sleeping
- Fatigue / Feeling unusually tired
- Difficulty with daily activities around the house
- Needed extra time in bed
- Could not get out of bed
- Confusion, disorientation, or hallucinations (altered mental state)
- None of these symptoms

Please identify how severe your symptoms were

## Fever

|           | Less than 37.8 C<br>(100.0 F) | 37.8-38.9 C<br>(100-102 F) | 39-39.9 C<br>(102-103.9 F) | 40 C (104 F) or<br>more | Did not take<br>temperature<br>Don't remember |
|-----------|-------------------------------|----------------------------|----------------------------|-------------------------|-----------------------------------------------|
| Monday    | <input type="radio"/>         | <input type="radio"/>      | <input type="radio"/>      | <input type="radio"/>   | <input type="radio"/>                         |
| Tuesday   | <input type="radio"/>         | <input type="radio"/>      | <input type="radio"/>      | <input type="radio"/>   | <input type="radio"/>                         |
| Wednesday | <input type="radio"/>         | <input type="radio"/>      | <input type="radio"/>      | <input type="radio"/>   | <input type="radio"/>                         |
| Thursday  | <input type="radio"/>         | <input type="radio"/>      | <input type="radio"/>      | <input type="radio"/>   | <input type="radio"/>                         |
| Friday    | <input type="radio"/>         | <input type="radio"/>      | <input type="radio"/>      | <input type="radio"/>   | <input type="radio"/>                         |
| Saturday  | <input type="radio"/>         | <input type="radio"/>      | <input type="radio"/>      | <input type="radio"/>   | <input type="radio"/>                         |
| Sunday    | <input type="radio"/>         | <input type="radio"/>      | <input type="radio"/>      | <input type="radio"/>   | <input type="radio"/>                         |

## Feeling Feverish

|           | None                  | Mild                  | Moderate              | Severe                |
|-----------|-----------------------|-----------------------|-----------------------|-----------------------|
| Monday    | <input type="radio"/> | <input type="radio"/> | <input type="radio"/> | <input type="radio"/> |
| Tuesday   | <input type="radio"/> | <input type="radio"/> | <input type="radio"/> | <input type="radio"/> |
| Wednesday | <input type="radio"/> | <input type="radio"/> | <input type="radio"/> | <input type="radio"/> |
| Thursday  | <input type="radio"/> | <input type="radio"/> | <input type="radio"/> | <input type="radio"/> |
| Friday    | <input type="radio"/> | <input type="radio"/> | <input type="radio"/> | <input type="radio"/> |
| Saturday  | <input type="radio"/> | <input type="radio"/> | <input type="radio"/> | <input type="radio"/> |
| Sunday    | <input type="radio"/> | <input type="radio"/> | <input type="radio"/> | <input type="radio"/> |

## Chills and Shakes

## Confidential

Page 3

|           | None                  | Mild                  | Moderate              | Severe                |
|-----------|-----------------------|-----------------------|-----------------------|-----------------------|
| Monday    | <input type="radio"/> | <input type="radio"/> | <input type="radio"/> | <input type="radio"/> |
| Tuesday   | <input type="radio"/> | <input type="radio"/> | <input type="radio"/> | <input type="radio"/> |
| Wednesday | <input type="radio"/> | <input type="radio"/> | <input type="radio"/> | <input type="radio"/> |
| Thursday  | <input type="radio"/> | <input type="radio"/> | <input type="radio"/> | <input type="radio"/> |
| Friday    | <input type="radio"/> | <input type="radio"/> | <input type="radio"/> | <input type="radio"/> |
| Saturday  | <input type="radio"/> | <input type="radio"/> | <input type="radio"/> | <input type="radio"/> |
| Sunday    | <input type="radio"/> | <input type="radio"/> | <input type="radio"/> | <input type="radio"/> |

## Night Sweats

|           | None                  | Mild                  | Moderate              | Severe                |
|-----------|-----------------------|-----------------------|-----------------------|-----------------------|
| Monday    | <input type="radio"/> | <input type="radio"/> | <input type="radio"/> | <input type="radio"/> |
| Tuesday   | <input type="radio"/> | <input type="radio"/> | <input type="radio"/> | <input type="radio"/> |
| Wednesday | <input type="radio"/> | <input type="radio"/> | <input type="radio"/> | <input type="radio"/> |
| Thursday  | <input type="radio"/> | <input type="radio"/> | <input type="radio"/> | <input type="radio"/> |
| Friday    | <input type="radio"/> | <input type="radio"/> | <input type="radio"/> | <input type="radio"/> |
| Saturday  | <input type="radio"/> | <input type="radio"/> | <input type="radio"/> | <input type="radio"/> |
| Sunday    | <input type="radio"/> | <input type="radio"/> | <input type="radio"/> | <input type="radio"/> |

## Muscle Ache

|           | None                  | Mild                  | Moderate              | Severe                |
|-----------|-----------------------|-----------------------|-----------------------|-----------------------|
| Monday    | <input type="radio"/> | <input type="radio"/> | <input type="radio"/> | <input type="radio"/> |
| Tuesday   | <input type="radio"/> | <input type="radio"/> | <input type="radio"/> | <input type="radio"/> |
| Wednesday | <input type="radio"/> | <input type="radio"/> | <input type="radio"/> | <input type="radio"/> |
| Thursday  | <input type="radio"/> | <input type="radio"/> | <input type="radio"/> | <input type="radio"/> |
| Friday    | <input type="radio"/> | <input type="radio"/> | <input type="radio"/> | <input type="radio"/> |
| Saturday  | <input type="radio"/> | <input type="radio"/> | <input type="radio"/> | <input type="radio"/> |
| Sunday    | <input type="radio"/> | <input type="radio"/> | <input type="radio"/> | <input type="radio"/> |

## Bone or Joint ache

|           | None                  | Mild                  | Moderate              | Severe                |
|-----------|-----------------------|-----------------------|-----------------------|-----------------------|
| Monday    | <input type="radio"/> | <input type="radio"/> | <input type="radio"/> | <input type="radio"/> |
| Tuesday   | <input type="radio"/> | <input type="radio"/> | <input type="radio"/> | <input type="radio"/> |
| Wednesday | <input type="radio"/> | <input type="radio"/> | <input type="radio"/> | <input type="radio"/> |
| Thursday  | <input type="radio"/> | <input type="radio"/> | <input type="radio"/> | <input type="radio"/> |
| Friday    | <input type="radio"/> | <input type="radio"/> | <input type="radio"/> | <input type="radio"/> |
| Saturday  | <input type="radio"/> | <input type="radio"/> | <input type="radio"/> | <input type="radio"/> |
| Sunday    | <input type="radio"/> | <input type="radio"/> | <input type="radio"/> | <input type="radio"/> |

## Loss of Appetite

## Confidential

Page 4

|           | None                  | Mild                  | Moderate              | Severe                |
|-----------|-----------------------|-----------------------|-----------------------|-----------------------|
| Monday    | <input type="radio"/> | <input type="radio"/> | <input type="radio"/> | <input type="radio"/> |
| Tuesday   | <input type="radio"/> | <input type="radio"/> | <input type="radio"/> | <input type="radio"/> |
| Wednesday | <input type="radio"/> | <input type="radio"/> | <input type="radio"/> | <input type="radio"/> |
| Thursday  | <input type="radio"/> | <input type="radio"/> | <input type="radio"/> | <input type="radio"/> |
| Friday    | <input type="radio"/> | <input type="radio"/> | <input type="radio"/> | <input type="radio"/> |
| Saturday  | <input type="radio"/> | <input type="radio"/> | <input type="radio"/> | <input type="radio"/> |
| Sunday    | <input type="radio"/> | <input type="radio"/> | <input type="radio"/> | <input type="radio"/> |

## Headache

|           | None                  | Mild                  | Moderate              | Severe                |
|-----------|-----------------------|-----------------------|-----------------------|-----------------------|
| Monday    | <input type="radio"/> | <input type="radio"/> | <input type="radio"/> | <input type="radio"/> |
| Tuesday   | <input type="radio"/> | <input type="radio"/> | <input type="radio"/> | <input type="radio"/> |
| Wednesday | <input type="radio"/> | <input type="radio"/> | <input type="radio"/> | <input type="radio"/> |
| Thursday  | <input type="radio"/> | <input type="radio"/> | <input type="radio"/> | <input type="radio"/> |
| Friday    | <input type="radio"/> | <input type="radio"/> | <input type="radio"/> | <input type="radio"/> |
| Saturday  | <input type="radio"/> | <input type="radio"/> | <input type="radio"/> | <input type="radio"/> |
| Sunday    | <input type="radio"/> | <input type="radio"/> | <input type="radio"/> | <input type="radio"/> |

## Confusion, disorientation, or hallucinations (altered mental state)

|           | None                  | Mild                  | Moderate              | Severe                |
|-----------|-----------------------|-----------------------|-----------------------|-----------------------|
| Monday    | <input type="radio"/> | <input type="radio"/> | <input type="radio"/> | <input type="radio"/> |
| Tuesday   | <input type="radio"/> | <input type="radio"/> | <input type="radio"/> | <input type="radio"/> |
| Wednesday | <input type="radio"/> | <input type="radio"/> | <input type="radio"/> | <input type="radio"/> |
| Thursday  | <input type="radio"/> | <input type="radio"/> | <input type="radio"/> | <input type="radio"/> |
| Friday    | <input type="radio"/> | <input type="radio"/> | <input type="radio"/> | <input type="radio"/> |
| Saturday  | <input type="radio"/> | <input type="radio"/> | <input type="radio"/> | <input type="radio"/> |
| Sunday    | <input type="radio"/> | <input type="radio"/> | <input type="radio"/> | <input type="radio"/> |

## Lack of Concentration

|           | None                  | Mild                  | Moderate              | Severe                |
|-----------|-----------------------|-----------------------|-----------------------|-----------------------|
| Monday    | <input type="radio"/> | <input type="radio"/> | <input type="radio"/> | <input type="radio"/> |
| Tuesday   | <input type="radio"/> | <input type="radio"/> | <input type="radio"/> | <input type="radio"/> |
| Wednesday | <input type="radio"/> | <input type="radio"/> | <input type="radio"/> | <input type="radio"/> |
| Thursday  | <input type="radio"/> | <input type="radio"/> | <input type="radio"/> | <input type="radio"/> |
| Friday    | <input type="radio"/> | <input type="radio"/> | <input type="radio"/> | <input type="radio"/> |
| Saturday  | <input type="radio"/> | <input type="radio"/> | <input type="radio"/> | <input type="radio"/> |
| Sunday    | <input type="radio"/> | <input type="radio"/> | <input type="radio"/> | <input type="radio"/> |

## Lightheaded or Dizzy

## Confidential

Page 5

|           | None                  | Mild                  | Moderate              | Severe                |
|-----------|-----------------------|-----------------------|-----------------------|-----------------------|
| Monday    | <input type="radio"/> | <input type="radio"/> | <input type="radio"/> | <input type="radio"/> |
| Tuesday   | <input type="radio"/> | <input type="radio"/> | <input type="radio"/> | <input type="radio"/> |
| Wednesday | <input type="radio"/> | <input type="radio"/> | <input type="radio"/> | <input type="radio"/> |
| Thursday  | <input type="radio"/> | <input type="radio"/> | <input type="radio"/> | <input type="radio"/> |
| Friday    | <input type="radio"/> | <input type="radio"/> | <input type="radio"/> | <input type="radio"/> |
| Saturday  | <input type="radio"/> | <input type="radio"/> | <input type="radio"/> | <input type="radio"/> |
| Sunday    | <input type="radio"/> | <input type="radio"/> | <input type="radio"/> | <input type="radio"/> |

## Not Sleeping

|           | None                  | Mild                  | Moderate              | Severe                |
|-----------|-----------------------|-----------------------|-----------------------|-----------------------|
| Monday    | <input type="radio"/> | <input type="radio"/> | <input type="radio"/> | <input type="radio"/> |
| Tuesday   | <input type="radio"/> | <input type="radio"/> | <input type="radio"/> | <input type="radio"/> |
| Wednesday | <input type="radio"/> | <input type="radio"/> | <input type="radio"/> | <input type="radio"/> |
| Thursday  | <input type="radio"/> | <input type="radio"/> | <input type="radio"/> | <input type="radio"/> |
| Friday    | <input type="radio"/> | <input type="radio"/> | <input type="radio"/> | <input type="radio"/> |
| Saturday  | <input type="radio"/> | <input type="radio"/> | <input type="radio"/> | <input type="radio"/> |
| Sunday    | <input type="radio"/> | <input type="radio"/> | <input type="radio"/> | <input type="radio"/> |

## Fatigue/Feeling Unusually Tired

|           | None                  | Mild                  | Moderate              | Severe                |
|-----------|-----------------------|-----------------------|-----------------------|-----------------------|
| Monday    | <input type="radio"/> | <input type="radio"/> | <input type="radio"/> | <input type="radio"/> |
| Tuesday   | <input type="radio"/> | <input type="radio"/> | <input type="radio"/> | <input type="radio"/> |
| Wednesday | <input type="radio"/> | <input type="radio"/> | <input type="radio"/> | <input type="radio"/> |
| Thursday  | <input type="radio"/> | <input type="radio"/> | <input type="radio"/> | <input type="radio"/> |
| Friday    | <input type="radio"/> | <input type="radio"/> | <input type="radio"/> | <input type="radio"/> |
| Saturday  | <input type="radio"/> | <input type="radio"/> | <input type="radio"/> | <input type="radio"/> |
| Sunday    | <input type="radio"/> | <input type="radio"/> | <input type="radio"/> | <input type="radio"/> |

## Difficulties with Daily Activities

|           | None                  | Mild                  | Moderate              | Severe                |
|-----------|-----------------------|-----------------------|-----------------------|-----------------------|
| Monday    | <input type="radio"/> | <input type="radio"/> | <input type="radio"/> | <input type="radio"/> |
| Tuesday   | <input type="radio"/> | <input type="radio"/> | <input type="radio"/> | <input type="radio"/> |
| Wednesday | <input type="radio"/> | <input type="radio"/> | <input type="radio"/> | <input type="radio"/> |
| Thursday  | <input type="radio"/> | <input type="radio"/> | <input type="radio"/> | <input type="radio"/> |
| Friday    | <input type="radio"/> | <input type="radio"/> | <input type="radio"/> | <input type="radio"/> |
| Saturday  | <input type="radio"/> | <input type="radio"/> | <input type="radio"/> | <input type="radio"/> |
| Sunday    | <input type="radio"/> | <input type="radio"/> | <input type="radio"/> | <input type="radio"/> |

## Needed extra time in bed

## Confidential

Page 6

---

|           | None                  | Mild                  | Moderate              | Severe                |
|-----------|-----------------------|-----------------------|-----------------------|-----------------------|
| Monday    | <input type="radio"/> | <input type="radio"/> | <input type="radio"/> | <input type="radio"/> |
| Tuesday   | <input type="radio"/> | <input type="radio"/> | <input type="radio"/> | <input type="radio"/> |
| Wednesday | <input type="radio"/> | <input type="radio"/> | <input type="radio"/> | <input type="radio"/> |
| Thursday  | <input type="radio"/> | <input type="radio"/> | <input type="radio"/> | <input type="radio"/> |
| Friday    | <input type="radio"/> | <input type="radio"/> | <input type="radio"/> | <input type="radio"/> |
| Saturday  | <input type="radio"/> | <input type="radio"/> | <input type="radio"/> | <input type="radio"/> |
| Sunday    | <input type="radio"/> | <input type="radio"/> | <input type="radio"/> | <input type="radio"/> |

---

Could not get out of bed

---

|           | None                  | Mild                  | Moderate              | Severe                |
|-----------|-----------------------|-----------------------|-----------------------|-----------------------|
| Monday    | <input type="radio"/> | <input type="radio"/> | <input type="radio"/> | <input type="radio"/> |
| Tuesday   | <input type="radio"/> | <input type="radio"/> | <input type="radio"/> | <input type="radio"/> |
| Wednesday | <input type="radio"/> | <input type="radio"/> | <input type="radio"/> | <input type="radio"/> |
| Thursday  | <input type="radio"/> | <input type="radio"/> | <input type="radio"/> | <input type="radio"/> |
| Friday    | <input type="radio"/> | <input type="radio"/> | <input type="radio"/> | <input type="radio"/> |
| Saturday  | <input type="radio"/> | <input type="radio"/> | <input type="radio"/> | <input type="radio"/> |
| Sunday    | <input type="radio"/> | <input type="radio"/> | <input type="radio"/> | <input type="radio"/> |

Confidential

Page 7

**Respiratory Symptoms - [go\_arm\_1][hh1\_fname] [go\_arm\_1][hh1\_sname]**

[go\_arm\_1][hh1\_fname] [go\_arm\_1][hh1\_sname]: Which  
Respiratory symptoms did you have?  
Select all that apply

- Runny Nose  
 Blocked Nose  
 Sinus pain / congestion  
 Dry cough  
 Coughing up Green Phlegm  
 Coughing up White Phlegm  
 Loss or change to sense of smell  
 Loss or change to sense of taste  
 Sneezing  
 Sore Throat  
 Swollen tonsils  
 Swollen glands (enlarged lymph nodes)  
 Ear pain or change in hearing  
 Fluid leaking from ear  
 Shortness of breath difficulty breathing  
 Wheezing  
 Chest pain (not changed by breathing or moving)  
 Chest pain when breathing in  
 None of these symptoms

Please identify how severe your symptoms were

## Runny Nose

|           | None                  | Mild                  | Moderate              | Severe                |
|-----------|-----------------------|-----------------------|-----------------------|-----------------------|
| Monday    | <input type="radio"/> | <input type="radio"/> | <input type="radio"/> | <input type="radio"/> |
| Tuesday   | <input type="radio"/> | <input type="radio"/> | <input type="radio"/> | <input type="radio"/> |
| Wednesday | <input type="radio"/> | <input type="radio"/> | <input type="radio"/> | <input type="radio"/> |
| Thursday  | <input type="radio"/> | <input type="radio"/> | <input type="radio"/> | <input type="radio"/> |
| Friday    | <input type="radio"/> | <input type="radio"/> | <input type="radio"/> | <input type="radio"/> |
| Saturday  | <input type="radio"/> | <input type="radio"/> | <input type="radio"/> | <input type="radio"/> |
| Sunday    | <input type="radio"/> | <input type="radio"/> | <input type="radio"/> | <input type="radio"/> |

## Blocked Nose

|           | None                  | Mild                  | Moderate              | Severe                |
|-----------|-----------------------|-----------------------|-----------------------|-----------------------|
| Monday    | <input type="radio"/> | <input type="radio"/> | <input type="radio"/> | <input type="radio"/> |
| Tuesday   | <input type="radio"/> | <input type="radio"/> | <input type="radio"/> | <input type="radio"/> |
| Wednesday | <input type="radio"/> | <input type="radio"/> | <input type="radio"/> | <input type="radio"/> |
| Thursday  | <input type="radio"/> | <input type="radio"/> | <input type="radio"/> | <input type="radio"/> |
| Friday    | <input type="radio"/> | <input type="radio"/> | <input type="radio"/> | <input type="radio"/> |
| Saturday  | <input type="radio"/> | <input type="radio"/> | <input type="radio"/> | <input type="radio"/> |
| Sunday    | <input type="radio"/> | <input type="radio"/> | <input type="radio"/> | <input type="radio"/> |

## Sinus Pain/Congestion

|        | None                  | Mild                  | Moderate              | Severe                |
|--------|-----------------------|-----------------------|-----------------------|-----------------------|
| Monday | <input type="radio"/> | <input type="radio"/> | <input type="radio"/> | <input type="radio"/> |

Confidential

Page 8

|           |                       |                       |                       |                       |
|-----------|-----------------------|-----------------------|-----------------------|-----------------------|
| Tuesday   | <input type="radio"/> | <input type="radio"/> | <input type="radio"/> | <input type="radio"/> |
| Wednesday | <input type="radio"/> | <input type="radio"/> | <input type="radio"/> | <input type="radio"/> |
| Thursday  | <input type="radio"/> | <input type="radio"/> | <input type="radio"/> | <input type="radio"/> |
| Friday    | <input type="radio"/> | <input type="radio"/> | <input type="radio"/> | <input type="radio"/> |
| Saturday  | <input type="radio"/> | <input type="radio"/> | <input type="radio"/> | <input type="radio"/> |
| Sunday    | <input type="radio"/> | <input type="radio"/> | <input type="radio"/> | <input type="radio"/> |

---

 Dry cough
 

---

|           | None                  | Mild                  | Moderate              | Severe                |
|-----------|-----------------------|-----------------------|-----------------------|-----------------------|
| Monday    | <input type="radio"/> | <input type="radio"/> | <input type="radio"/> | <input type="radio"/> |
| Tuesday   | <input type="radio"/> | <input type="radio"/> | <input type="radio"/> | <input type="radio"/> |
| Wednesday | <input type="radio"/> | <input type="radio"/> | <input type="radio"/> | <input type="radio"/> |
| Thursday  | <input type="radio"/> | <input type="radio"/> | <input type="radio"/> | <input type="radio"/> |
| Friday    | <input type="radio"/> | <input type="radio"/> | <input type="radio"/> | <input type="radio"/> |
| Saturday  | <input type="radio"/> | <input type="radio"/> | <input type="radio"/> | <input type="radio"/> |
| Sunday    | <input type="radio"/> | <input type="radio"/> | <input type="radio"/> | <input type="radio"/> |

---

 Coughing up Green Phlegm
 

---

|           | None                  | Mild                  | Moderate              | Severe                |
|-----------|-----------------------|-----------------------|-----------------------|-----------------------|
| Monday    | <input type="radio"/> | <input type="radio"/> | <input type="radio"/> | <input type="radio"/> |
| Tuesday   | <input type="radio"/> | <input type="radio"/> | <input type="radio"/> | <input type="radio"/> |
| Wednesday | <input type="radio"/> | <input type="radio"/> | <input type="radio"/> | <input type="radio"/> |
| Thursday  | <input type="radio"/> | <input type="radio"/> | <input type="radio"/> | <input type="radio"/> |
| Friday    | <input type="radio"/> | <input type="radio"/> | <input type="radio"/> | <input type="radio"/> |
| Saturday  | <input type="radio"/> | <input type="radio"/> | <input type="radio"/> | <input type="radio"/> |
| Sunday    | <input type="radio"/> | <input type="radio"/> | <input type="radio"/> | <input type="radio"/> |

---

 Coughing up White Phlegm
 

---

|           | None                  | Mild                  | Moderate              | Severe                |
|-----------|-----------------------|-----------------------|-----------------------|-----------------------|
| Monday    | <input type="radio"/> | <input type="radio"/> | <input type="radio"/> | <input type="radio"/> |
| Tuesday   | <input type="radio"/> | <input type="radio"/> | <input type="radio"/> | <input type="radio"/> |
| Wednesday | <input type="radio"/> | <input type="radio"/> | <input type="radio"/> | <input type="radio"/> |
| Thursday  | <input type="radio"/> | <input type="radio"/> | <input type="radio"/> | <input type="radio"/> |
| Friday    | <input type="radio"/> | <input type="radio"/> | <input type="radio"/> | <input type="radio"/> |
| Saturday  | <input type="radio"/> | <input type="radio"/> | <input type="radio"/> | <input type="radio"/> |
| Sunday    | <input type="radio"/> | <input type="radio"/> | <input type="radio"/> | <input type="radio"/> |

---

 Loss or change to sense of smell
 

---



Confidential

Page 9

|           | None                  | Mild                  | Moderate              | Severe                |
|-----------|-----------------------|-----------------------|-----------------------|-----------------------|
| Monday    | <input type="radio"/> | <input type="radio"/> | <input type="radio"/> | <input type="radio"/> |
| Tuesday   | <input type="radio"/> | <input type="radio"/> | <input type="radio"/> | <input type="radio"/> |
| Wednesday | <input type="radio"/> | <input type="radio"/> | <input type="radio"/> | <input type="radio"/> |
| Thursday  | <input type="radio"/> | <input type="radio"/> | <input type="radio"/> | <input type="radio"/> |
| Friday    | <input type="radio"/> | <input type="radio"/> | <input type="radio"/> | <input type="radio"/> |
| Saturday  | <input type="radio"/> | <input type="radio"/> | <input type="radio"/> | <input type="radio"/> |
| Sunday    | <input type="radio"/> | <input type="radio"/> | <input type="radio"/> | <input type="radio"/> |

Loss or change to sense of taste

|           | None                  | Mild                  | Moderate              | Severe                |
|-----------|-----------------------|-----------------------|-----------------------|-----------------------|
| Monday    | <input type="radio"/> | <input type="radio"/> | <input type="radio"/> | <input type="radio"/> |
| Tuesday   | <input type="radio"/> | <input type="radio"/> | <input type="radio"/> | <input type="radio"/> |
| Wednesday | <input type="radio"/> | <input type="radio"/> | <input type="radio"/> | <input type="radio"/> |
| Thursday  | <input type="radio"/> | <input type="radio"/> | <input type="radio"/> | <input type="radio"/> |
| Friday    | <input type="radio"/> | <input type="radio"/> | <input type="radio"/> | <input type="radio"/> |
| Saturday  | <input type="radio"/> | <input type="radio"/> | <input type="radio"/> | <input type="radio"/> |
| Sunday    | <input type="radio"/> | <input type="radio"/> | <input type="radio"/> | <input type="radio"/> |

Sneezing

|           | None                  | Mild                  | Moderate              | Severe                |
|-----------|-----------------------|-----------------------|-----------------------|-----------------------|
| Monday    | <input type="radio"/> | <input type="radio"/> | <input type="radio"/> | <input type="radio"/> |
| Tuesday   | <input type="radio"/> | <input type="radio"/> | <input type="radio"/> | <input type="radio"/> |
| Wednesday | <input type="radio"/> | <input type="radio"/> | <input type="radio"/> | <input type="radio"/> |
| Thursday  | <input type="radio"/> | <input type="radio"/> | <input type="radio"/> | <input type="radio"/> |
| Friday    | <input type="radio"/> | <input type="radio"/> | <input type="radio"/> | <input type="radio"/> |
| Saturday  | <input type="radio"/> | <input type="radio"/> | <input type="radio"/> | <input type="radio"/> |
| Sunday    | <input type="radio"/> | <input type="radio"/> | <input type="radio"/> | <input type="radio"/> |

Sore Throat

|           | None                  | Mild                  | Moderate              | Severe                |
|-----------|-----------------------|-----------------------|-----------------------|-----------------------|
| Monday    | <input type="radio"/> | <input type="radio"/> | <input type="radio"/> | <input type="radio"/> |
| Tuesday   | <input type="radio"/> | <input type="radio"/> | <input type="radio"/> | <input type="radio"/> |
| Wednesday | <input type="radio"/> | <input type="radio"/> | <input type="radio"/> | <input type="radio"/> |
| Thursday  | <input type="radio"/> | <input type="radio"/> | <input type="radio"/> | <input type="radio"/> |
| Friday    | <input type="radio"/> | <input type="radio"/> | <input type="radio"/> | <input type="radio"/> |
| Saturday  | <input type="radio"/> | <input type="radio"/> | <input type="radio"/> | <input type="radio"/> |
| Sunday    | <input type="radio"/> | <input type="radio"/> | <input type="radio"/> | <input type="radio"/> |

Swollen Tonsils

Confidential

Page 10

|           | None                  | Mild                  | Moderate              | Severe                |
|-----------|-----------------------|-----------------------|-----------------------|-----------------------|
| Monday    | <input type="radio"/> | <input type="radio"/> | <input type="radio"/> | <input type="radio"/> |
| Tuesday   | <input type="radio"/> | <input type="radio"/> | <input type="radio"/> | <input type="radio"/> |
| Wednesday | <input type="radio"/> | <input type="radio"/> | <input type="radio"/> | <input type="radio"/> |
| Thursday  | <input type="radio"/> | <input type="radio"/> | <input type="radio"/> | <input type="radio"/> |
| Friday    | <input type="radio"/> | <input type="radio"/> | <input type="radio"/> | <input type="radio"/> |
| Saturday  | <input type="radio"/> | <input type="radio"/> | <input type="radio"/> | <input type="radio"/> |
| Sunday    | <input type="radio"/> | <input type="radio"/> | <input type="radio"/> | <input type="radio"/> |

## Swollen Glands (enlarged lymph nodes)

|           | None                  | Mild                  | Moderate              | Severe                |
|-----------|-----------------------|-----------------------|-----------------------|-----------------------|
| Monday    | <input type="radio"/> | <input type="radio"/> | <input type="radio"/> | <input type="radio"/> |
| Tuesday   | <input type="radio"/> | <input type="radio"/> | <input type="radio"/> | <input type="radio"/> |
| Wednesday | <input type="radio"/> | <input type="radio"/> | <input type="radio"/> | <input type="radio"/> |
| Thursday  | <input type="radio"/> | <input type="radio"/> | <input type="radio"/> | <input type="radio"/> |
| Friday    | <input type="radio"/> | <input type="radio"/> | <input type="radio"/> | <input type="radio"/> |
| Saturday  | <input type="radio"/> | <input type="radio"/> | <input type="radio"/> | <input type="radio"/> |
| Sunday    | <input type="radio"/> | <input type="radio"/> | <input type="radio"/> | <input type="radio"/> |

## Ear pain or change in hearing

|           | None                  | Mild                  | Moderate              | Severe                |
|-----------|-----------------------|-----------------------|-----------------------|-----------------------|
| Monday    | <input type="radio"/> | <input type="radio"/> | <input type="radio"/> | <input type="radio"/> |
| Tuesday   | <input type="radio"/> | <input type="radio"/> | <input type="radio"/> | <input type="radio"/> |
| Wednesday | <input type="radio"/> | <input type="radio"/> | <input type="radio"/> | <input type="radio"/> |
| Thursday  | <input type="radio"/> | <input type="radio"/> | <input type="radio"/> | <input type="radio"/> |
| Friday    | <input type="radio"/> | <input type="radio"/> | <input type="radio"/> | <input type="radio"/> |
| Saturday  | <input type="radio"/> | <input type="radio"/> | <input type="radio"/> | <input type="radio"/> |
| Sunday    | <input type="radio"/> | <input type="radio"/> | <input type="radio"/> | <input type="radio"/> |

## Fluid leaking from ear

|           | None                  | Mild                  | Moderate              | Severe                |
|-----------|-----------------------|-----------------------|-----------------------|-----------------------|
| Monday    | <input type="radio"/> | <input type="radio"/> | <input type="radio"/> | <input type="radio"/> |
| Tuesday   | <input type="radio"/> | <input type="radio"/> | <input type="radio"/> | <input type="radio"/> |
| Wednesday | <input type="radio"/> | <input type="radio"/> | <input type="radio"/> | <input type="radio"/> |
| Thursday  | <input type="radio"/> | <input type="radio"/> | <input type="radio"/> | <input type="radio"/> |
| Friday    | <input type="radio"/> | <input type="radio"/> | <input type="radio"/> | <input type="radio"/> |
| Saturday  | <input type="radio"/> | <input type="radio"/> | <input type="radio"/> | <input type="radio"/> |
| Sunday    | <input type="radio"/> | <input type="radio"/> | <input type="radio"/> | <input type="radio"/> |

## Shortness of Breath/difficulty breathing

## Confidential

Page 11

|           | None                  | Mild                  | Moderate              | Severe                |
|-----------|-----------------------|-----------------------|-----------------------|-----------------------|
| Monday    | <input type="radio"/> | <input type="radio"/> | <input type="radio"/> | <input type="radio"/> |
| Tuesday   | <input type="radio"/> | <input type="radio"/> | <input type="radio"/> | <input type="radio"/> |
| Wednesday | <input type="radio"/> | <input type="radio"/> | <input type="radio"/> | <input type="radio"/> |
| Thursday  | <input type="radio"/> | <input type="radio"/> | <input type="radio"/> | <input type="radio"/> |
| Friday    | <input type="radio"/> | <input type="radio"/> | <input type="radio"/> | <input type="radio"/> |
| Saturday  | <input type="radio"/> | <input type="radio"/> | <input type="radio"/> | <input type="radio"/> |
| Sunday    | <input type="radio"/> | <input type="radio"/> | <input type="radio"/> | <input type="radio"/> |

## Wheezing

|           | None                  | Mild                  | Moderate              | Severe                |
|-----------|-----------------------|-----------------------|-----------------------|-----------------------|
| Monday    | <input type="radio"/> | <input type="radio"/> | <input type="radio"/> | <input type="radio"/> |
| Tuesday   | <input type="radio"/> | <input type="radio"/> | <input type="radio"/> | <input type="radio"/> |
| Wednesday | <input type="radio"/> | <input type="radio"/> | <input type="radio"/> | <input type="radio"/> |
| Thursday  | <input type="radio"/> | <input type="radio"/> | <input type="radio"/> | <input type="radio"/> |
| Friday    | <input type="radio"/> | <input type="radio"/> | <input type="radio"/> | <input type="radio"/> |
| Saturday  | <input type="radio"/> | <input type="radio"/> | <input type="radio"/> | <input type="radio"/> |
| Sunday    | <input type="radio"/> | <input type="radio"/> | <input type="radio"/> | <input type="radio"/> |

## Chest pain (not changed by breathing or moving)

|           | None                  | Mild                  | Moderate              | Severe                |
|-----------|-----------------------|-----------------------|-----------------------|-----------------------|
| Monday    | <input type="radio"/> | <input type="radio"/> | <input type="radio"/> | <input type="radio"/> |
| Tuesday   | <input type="radio"/> | <input type="radio"/> | <input type="radio"/> | <input type="radio"/> |
| Wednesday | <input type="radio"/> | <input type="radio"/> | <input type="radio"/> | <input type="radio"/> |
| Thursday  | <input type="radio"/> | <input type="radio"/> | <input type="radio"/> | <input type="radio"/> |
| Friday    | <input type="radio"/> | <input type="radio"/> | <input type="radio"/> | <input type="radio"/> |
| Saturday  | <input type="radio"/> | <input type="radio"/> | <input type="radio"/> | <input type="radio"/> |
| Sunday    | <input type="radio"/> | <input type="radio"/> | <input type="radio"/> | <input type="radio"/> |

## Chest pain when breathing in

|           | None                  | Mild                  | Moderate              | Severe                |
|-----------|-----------------------|-----------------------|-----------------------|-----------------------|
| Monday    | <input type="radio"/> | <input type="radio"/> | <input type="radio"/> | <input type="radio"/> |
| Tuesday   | <input type="radio"/> | <input type="radio"/> | <input type="radio"/> | <input type="radio"/> |
| Wednesday | <input type="radio"/> | <input type="radio"/> | <input type="radio"/> | <input type="radio"/> |
| Thursday  | <input type="radio"/> | <input type="radio"/> | <input type="radio"/> | <input type="radio"/> |
| Friday    | <input type="radio"/> | <input type="radio"/> | <input type="radio"/> | <input type="radio"/> |
| Saturday  | <input type="radio"/> | <input type="radio"/> | <input type="radio"/> | <input type="radio"/> |
| Sunday    | <input type="radio"/> | <input type="radio"/> | <input type="radio"/> | <input type="radio"/> |

Confidential

Page 12

**Other Symptoms - [go\_arm\_1][hh1\_fname] [go\_arm\_1][hh1\_sname]**

[go\_arm\_1][hh1\_fname] [go\_arm\_1][hh1\_sname]: Which eye related symptoms did you have this week?  
Select all that apply

- Eye redness  
 Sticky Eye  
 Eye pain  
 Deterioration of eyesight  
 None of these symptoms

[go\_arm\_1][hh1\_fname] [go\_arm\_1][hh1\_sname]: Where did the rash affect you?

- Rash (all over)  
 Rash (local)  
 None of these symptoms

Where on the body did the rash affect you?  
\_\_\_\_\_

[go\_arm\_1][hh1\_fname] [go\_arm\_1][hh1\_sname]: Which gastrointestinal symptoms did you have?  
Select all that apply

- Diarrhoea (even mild)  
 Vomiting (being sick)  
 Nausea (feeling sick)  
 Abdominal pain (not including menstrual pain)  
 None of these symptoms

Please identify how severe your symptoms were

Red Eye(s)

|           | None                  | Mild                  | Moderate              | Severe                |
|-----------|-----------------------|-----------------------|-----------------------|-----------------------|
| Monday    | <input type="radio"/> | <input type="radio"/> | <input type="radio"/> | <input type="radio"/> |
| Tuesday   | <input type="radio"/> | <input type="radio"/> | <input type="radio"/> | <input type="radio"/> |
| Wednesday | <input type="radio"/> | <input type="radio"/> | <input type="radio"/> | <input type="radio"/> |
| Thursday  | <input type="radio"/> | <input type="radio"/> | <input type="radio"/> | <input type="radio"/> |
| Friday    | <input type="radio"/> | <input type="radio"/> | <input type="radio"/> | <input type="radio"/> |
| Saturday  | <input type="radio"/> | <input type="radio"/> | <input type="radio"/> | <input type="radio"/> |
| Sunday    | <input type="radio"/> | <input type="radio"/> | <input type="radio"/> | <input type="radio"/> |

Sticky Eye(s)

|           | None                  | Mild                  | Moderate              | Severe                |
|-----------|-----------------------|-----------------------|-----------------------|-----------------------|
| Monday    | <input type="radio"/> | <input type="radio"/> | <input type="radio"/> | <input type="radio"/> |
| Tuesday   | <input type="radio"/> | <input type="radio"/> | <input type="radio"/> | <input type="radio"/> |
| Wednesday | <input type="radio"/> | <input type="radio"/> | <input type="radio"/> | <input type="radio"/> |
| Thursday  | <input type="radio"/> | <input type="radio"/> | <input type="radio"/> | <input type="radio"/> |
| Friday    | <input type="radio"/> | <input type="radio"/> | <input type="radio"/> | <input type="radio"/> |
| Saturday  | <input type="radio"/> | <input type="radio"/> | <input type="radio"/> | <input type="radio"/> |
| Sunday    | <input type="radio"/> | <input type="radio"/> | <input type="radio"/> | <input type="radio"/> |

Eye Pain

Confidential

Page 13

|           | None                  | Mild                  | Moderate              | Severe                |
|-----------|-----------------------|-----------------------|-----------------------|-----------------------|
| Monday    | <input type="radio"/> | <input type="radio"/> | <input type="radio"/> | <input type="radio"/> |
| Tuesday   | <input type="radio"/> | <input type="radio"/> | <input type="radio"/> | <input type="radio"/> |
| Wednesday | <input type="radio"/> | <input type="radio"/> | <input type="radio"/> | <input type="radio"/> |
| Thursday  | <input type="radio"/> | <input type="radio"/> | <input type="radio"/> | <input type="radio"/> |
| Friday    | <input type="radio"/> | <input type="radio"/> | <input type="radio"/> | <input type="radio"/> |
| Saturday  | <input type="radio"/> | <input type="radio"/> | <input type="radio"/> | <input type="radio"/> |
| Sunday    | <input type="radio"/> | <input type="radio"/> | <input type="radio"/> | <input type="radio"/> |

## Deterioration of eyesight

|           | None                  | Mild                  | Moderate              | Severe                |
|-----------|-----------------------|-----------------------|-----------------------|-----------------------|
| Monday    | <input type="radio"/> | <input type="radio"/> | <input type="radio"/> | <input type="radio"/> |
| Tuesday   | <input type="radio"/> | <input type="radio"/> | <input type="radio"/> | <input type="radio"/> |
| Wednesday | <input type="radio"/> | <input type="radio"/> | <input type="radio"/> | <input type="radio"/> |
| Thursday  | <input type="radio"/> | <input type="radio"/> | <input type="radio"/> | <input type="radio"/> |
| Friday    | <input type="radio"/> | <input type="radio"/> | <input type="radio"/> | <input type="radio"/> |
| Saturday  | <input type="radio"/> | <input type="radio"/> | <input type="radio"/> | <input type="radio"/> |
| Sunday    | <input type="radio"/> | <input type="radio"/> | <input type="radio"/> | <input type="radio"/> |

## Rash - All Over

|           | None                  | Mild                  | Moderate              | Severe                |
|-----------|-----------------------|-----------------------|-----------------------|-----------------------|
| Monday    | <input type="radio"/> | <input type="radio"/> | <input type="radio"/> | <input type="radio"/> |
| Tuesday   | <input type="radio"/> | <input type="radio"/> | <input type="radio"/> | <input type="radio"/> |
| Wednesday | <input type="radio"/> | <input type="radio"/> | <input type="radio"/> | <input type="radio"/> |
| Thursday  | <input type="radio"/> | <input type="radio"/> | <input type="radio"/> | <input type="radio"/> |
| Friday    | <input type="radio"/> | <input type="radio"/> | <input type="radio"/> | <input type="radio"/> |
| Saturday  | <input type="radio"/> | <input type="radio"/> | <input type="radio"/> | <input type="radio"/> |
| Sunday    | <input type="radio"/> | <input type="radio"/> | <input type="radio"/> | <input type="radio"/> |

## Rash - Local

|           | None                  | Mild                  | Moderate              | Severe                |
|-----------|-----------------------|-----------------------|-----------------------|-----------------------|
| Monday    | <input type="radio"/> | <input type="radio"/> | <input type="radio"/> | <input type="radio"/> |
| Tuesday   | <input type="radio"/> | <input type="radio"/> | <input type="radio"/> | <input type="radio"/> |
| Wednesday | <input type="radio"/> | <input type="radio"/> | <input type="radio"/> | <input type="radio"/> |
| Thursday  | <input type="radio"/> | <input type="radio"/> | <input type="radio"/> | <input type="radio"/> |
| Friday    | <input type="radio"/> | <input type="radio"/> | <input type="radio"/> | <input type="radio"/> |
| Saturday  | <input type="radio"/> | <input type="radio"/> | <input type="radio"/> | <input type="radio"/> |
| Sunday    | <input type="radio"/> | <input type="radio"/> | <input type="radio"/> | <input type="radio"/> |

## Diarrhoea (even mild)

## Confidential

Page 14

|           | None                  | Mild                  | Moderate              | Severe                |
|-----------|-----------------------|-----------------------|-----------------------|-----------------------|
| Monday    | <input type="radio"/> | <input type="radio"/> | <input type="radio"/> | <input type="radio"/> |
| Tuesday   | <input type="radio"/> | <input type="radio"/> | <input type="radio"/> | <input type="radio"/> |
| Wednesday | <input type="radio"/> | <input type="radio"/> | <input type="radio"/> | <input type="radio"/> |
| Thursday  | <input type="radio"/> | <input type="radio"/> | <input type="radio"/> | <input type="radio"/> |
| Friday    | <input type="radio"/> | <input type="radio"/> | <input type="radio"/> | <input type="radio"/> |
| Saturday  | <input type="radio"/> | <input type="radio"/> | <input type="radio"/> | <input type="radio"/> |
| Sunday    | <input type="radio"/> | <input type="radio"/> | <input type="radio"/> | <input type="radio"/> |

## Vomiting (being sick)

|           | None                  | Mild                  | Moderate              | Severe                |
|-----------|-----------------------|-----------------------|-----------------------|-----------------------|
| Monday    | <input type="radio"/> | <input type="radio"/> | <input type="radio"/> | <input type="radio"/> |
| Tuesday   | <input type="radio"/> | <input type="radio"/> | <input type="radio"/> | <input type="radio"/> |
| Wednesday | <input type="radio"/> | <input type="radio"/> | <input type="radio"/> | <input type="radio"/> |
| Thursday  | <input type="radio"/> | <input type="radio"/> | <input type="radio"/> | <input type="radio"/> |
| Friday    | <input type="radio"/> | <input type="radio"/> | <input type="radio"/> | <input type="radio"/> |
| Saturday  | <input type="radio"/> | <input type="radio"/> | <input type="radio"/> | <input type="radio"/> |
| Sunday    | <input type="radio"/> | <input type="radio"/> | <input type="radio"/> | <input type="radio"/> |

## Nausea (feeling sick)

|           | None                  | Mild                  | Moderate              | Severe                |
|-----------|-----------------------|-----------------------|-----------------------|-----------------------|
| Monday    | <input type="radio"/> | <input type="radio"/> | <input type="radio"/> | <input type="radio"/> |
| Tuesday   | <input type="radio"/> | <input type="radio"/> | <input type="radio"/> | <input type="radio"/> |
| Wednesday | <input type="radio"/> | <input type="radio"/> | <input type="radio"/> | <input type="radio"/> |
| Thursday  | <input type="radio"/> | <input type="radio"/> | <input type="radio"/> | <input type="radio"/> |
| Friday    | <input type="radio"/> | <input type="radio"/> | <input type="radio"/> | <input type="radio"/> |
| Saturday  | <input type="radio"/> | <input type="radio"/> | <input type="radio"/> | <input type="radio"/> |
| Sunday    | <input type="radio"/> | <input type="radio"/> | <input type="radio"/> | <input type="radio"/> |

## Abdominal pain (not including menstrual pain)

|           | None                  | Mild                  | Moderate              | Severe                |
|-----------|-----------------------|-----------------------|-----------------------|-----------------------|
| Monday    | <input type="radio"/> | <input type="radio"/> | <input type="radio"/> | <input type="radio"/> |
| Tuesday   | <input type="radio"/> | <input type="radio"/> | <input type="radio"/> | <input type="radio"/> |
| Wednesday | <input type="radio"/> | <input type="radio"/> | <input type="radio"/> | <input type="radio"/> |
| Thursday  | <input type="radio"/> | <input type="radio"/> | <input type="radio"/> | <input type="radio"/> |
| Friday    | <input type="radio"/> | <input type="radio"/> | <input type="radio"/> | <input type="radio"/> |
| Saturday  | <input type="radio"/> | <input type="radio"/> | <input type="radio"/> | <input type="radio"/> |
| Sunday    | <input type="radio"/> | <input type="radio"/> | <input type="radio"/> | <input type="radio"/> |

Confidential

Page 15

**COVID-19 testing for [go\_arm\_1][hh1\_fname] [go\_arm\_1][hh1\_sname]**

[go\_arm\_1][hh1\_fname] [go\_arm\_1][hh1\_sname]: Have you sought COVID-19 testing for this illness via the NHS, government or your employer?  Yes  No

[go\_arm\_1][hh1\_fname] [go\_arm\_1][hh1\_sname]: You said you tried to get tested for COVID-19 via the NHS, government or your employer for this illness. Did you get tested?  Yes  No

[go\_arm\_1][hh1\_fname] [go\_arm\_1][hh1\_sname]: Why did you not get an NHS test for COVID-19?  I was advised the test was not needed  I am waiting for an NHS test kit to arrive by post  I could not get to a testing centre  I felt better so decided not to get tested  Other - please specify

Other (please specify): \_\_\_\_\_

[go\_arm\_1][hh1\_fname] [go\_arm\_1][hh1\_sname]: How long was the gap between your symptoms starting and you having an NHS COVID-19 test?  Same day  Next day  2 days later  3 to 4 days later  5 to 7 days later  More than a week

What was the result of that test?  Positive for COVID-19  Negative for COVID-19  The result was unclear  Still awaiting result

[go\_arm\_1][hh1\_fname] [go\_arm\_1][hh1\_sname]: How long was the gap between your symptoms starting and you getting the NHS test results?  Same day  Next day  2 days later  3 to 4 days later  5 to 7 days later  More than a week

Confidential

Page 16

**Tracing - [go\_arm\_1][hh1\_fname] [go\_arm\_1][hh1\_sname]**

If you had an illness that may be COVID-19 you should follow national advice on reporting this illness and seeking care. We will always have a link to the latest advice on the Virus Watch website.

[go\_arm\_1][hh1\_fname] [go\_arm\_1][hh1\_sname]: Have you reported your illness to any organisation other than Virus Watch?  
Select all that apply

- I did not report my illness to any other organisation
- Yes to the NHS Contact tracing app
- Yes to Google/Android contact tracing app
- Yes to the NHS Test and Trace service
- Yes to my employer
- Yes to my GP
- Yes to the NHS 111 online coronavirus service
- Yes to the general NHS 111 service
- Other (please specify)

Other (please specify)

\_\_\_\_\_

[go\_arm\_1][hh1\_fname] [go\_arm\_1][hh1\_sname]: Why did you not report your illness?

- I did not think it was COVID-19
- I didn't feel ill enough to need help
- I didn't know where to report it
- I didn't know I was supposed to report it
- I didn't want to self isolate
- I didn't want my contacts to have to self isolate
- I didn't want others to know that I might have COVID-19

[go\_arm\_1][hh1\_fname] [go\_arm\_1][hh1\_sname]: From the time two days before your illness started to now, have you had direct or close contact with anyone OTHER THAN HOUSEHOLD MEMBERS?

- Non-Household Direct Contacts - these are people you had direct physical contact with or with whom you exchanged at least a few words within a 2 metre distance (e.g. a handshake, embracing, kissing, contact sports).
- Non-Household Close contacts - these are people who were within 2 metres of you for 15 minutes or more but who you did not speak to or touch.
- I did not have direct or close contact with anybody other than household members

How many people did you have DIRECT CONTACT with other than household members?  
Please enter digits only, e.g. '5' and not 'five'

\_\_\_\_\_

How many people did you have CLOSE CONTACT with other than household members?  
Please enter digits only, e.g. '5' and not 'five'

\_\_\_\_\_

[go\_arm\_1][hh1\_fname] [go\_arm\_1][hh1\_sname]: Has anyone contacted you to ask about who you have been in contact with prior to or during your illness(contact tracing)?  
Please select all that apply

- No
- Yes - my GP
- Yes - the NHS Test and Trace System
- Yes - telephone advisory service
- Yes - through an online form
- Yes - through an app
- Yes - through my employer
- Yes - through my place of education
- Yes - the local public team
- Other - please specify

Other please specify:

\_\_\_\_\_



Confidential

Page 17

---

[go\_arm\_1][hh1\_fname] [go\_arm\_1][hh1\_sname]: Was anyone other than a household member asked to self-isolate because of contact with you?

- Yes - and I know how many were asked to self isolate
- Yes - but I don't know how many were asked to self isolate
- Nobody was asked to self isolate
- I don't know if anyone was asked to self isolate

---

How many people other than household contacts were asked to self-isolate because of contact with you?  
Please enter digits only, e.g. '5' and not 'five'

---

Confidential

Page 18

**Health Advice / Consultation - [go\_arm\_1][hh1\_fname] [go\_arm\_1][hh1\_sname]**

[go\_arm\_1][hh1\_fname] [go\_arm\_1][hh1\_sname]: You should follow official national advice about what to do if you have symptoms of COVID-19. We will always include a link to the latest advice on the Virus Watch website.

[go\_arm\_1][hh1\_fname] [go\_arm\_1][hh1\_sname]: Did the illness lead you (or someone else on your behalf) to seek advice about your symptoms this week?  Yes  No

This includes advice from: NHS 111 Pharmacies Nurses or doctors The internet Friends and family

Where was the advice or information sought from?

NHS 111 COVID-19 website  
 NHS 111 COVID-19 phone line  
 COVID-19 testing centre  
 Internet (e.g. WebMD , NHS choices)  
 Pharmacist  
 GP (by phone)  
 GP (visit to practice)  
 GP (online (including video))  
 Walk-in centre  
 A&E  
 Hospital  
 Friends or family  
 Other (please specify)

Other (Please Specify): \_\_\_\_\_

On which days was the medical advice or information sought from these sources Please check all that that apply on each day

|                                     | Monday                   | Tuesday                  | Wednesday                | Thursday                 | Friday                   | Saturday                 | Sunday                   |
|-------------------------------------|--------------------------|--------------------------|--------------------------|--------------------------|--------------------------|--------------------------|--------------------------|
| Internet (e.g. WebMD , NHS choices) | <input type="checkbox"/> | <input type="checkbox"/> | <input type="checkbox"/> | <input type="checkbox"/> | <input type="checkbox"/> | <input type="checkbox"/> | <input type="checkbox"/> |
| NHS 111 COVID-19 phone line         | <input type="checkbox"/> | <input type="checkbox"/> | <input type="checkbox"/> | <input type="checkbox"/> | <input type="checkbox"/> | <input type="checkbox"/> | <input type="checkbox"/> |
| NHS 111 COVID-19 website            | <input type="checkbox"/> | <input type="checkbox"/> | <input type="checkbox"/> | <input type="checkbox"/> | <input type="checkbox"/> | <input type="checkbox"/> | <input type="checkbox"/> |
| Pharmacist                          | <input type="checkbox"/> | <input type="checkbox"/> | <input type="checkbox"/> | <input type="checkbox"/> | <input type="checkbox"/> | <input type="checkbox"/> | <input type="checkbox"/> |
| GP (by phone)                       | <input type="checkbox"/> | <input type="checkbox"/> | <input type="checkbox"/> | <input type="checkbox"/> | <input type="checkbox"/> | <input type="checkbox"/> | <input type="checkbox"/> |
| GP (visit to practice)              | <input type="checkbox"/> | <input type="checkbox"/> | <input type="checkbox"/> | <input type="checkbox"/> | <input type="checkbox"/> | <input type="checkbox"/> | <input type="checkbox"/> |
| GP (online (including video))       | <input type="checkbox"/> | <input type="checkbox"/> | <input type="checkbox"/> | <input type="checkbox"/> | <input type="checkbox"/> | <input type="checkbox"/> | <input type="checkbox"/> |
| Walk-in centre                      | <input type="checkbox"/> | <input type="checkbox"/> | <input type="checkbox"/> | <input type="checkbox"/> | <input type="checkbox"/> | <input type="checkbox"/> | <input type="checkbox"/> |
| COVID-19 testing centre             | <input type="checkbox"/> | <input type="checkbox"/> | <input type="checkbox"/> | <input type="checkbox"/> | <input type="checkbox"/> | <input type="checkbox"/> | <input type="checkbox"/> |
| A&E                                 | <input type="checkbox"/> | <input type="checkbox"/> | <input type="checkbox"/> | <input type="checkbox"/> | <input type="checkbox"/> | <input type="checkbox"/> | <input type="checkbox"/> |
| Hospital                            | <input type="checkbox"/> | <input type="checkbox"/> | <input type="checkbox"/> | <input type="checkbox"/> | <input type="checkbox"/> | <input type="checkbox"/> | <input type="checkbox"/> |

Confidential

Page 19

**Medication - [go\_arm\_1][hh1\_fname] [go\_arm\_1][hh1\_sname]**

[go\_arm\_1][hh1\_fname] [go\_arm\_1][hh1\_sname]: Did your symptoms lead to taking any medicines during the survey week?  Yes  No

This includes prescribed medicines, medicine brought at the chemist or shops, or vitamin supplements

On which days did you take the medicines:  
Please select all that apply

|                                                         | Mon                      | Tues                     | Wed                      | Thurs                    | Fri                      | Sat                      | Sun                      |
|---------------------------------------------------------|--------------------------|--------------------------|--------------------------|--------------------------|--------------------------|--------------------------|--------------------------|
| Paracetamol                                             | <input type="checkbox"/> | <input type="checkbox"/> | <input type="checkbox"/> | <input type="checkbox"/> | <input type="checkbox"/> | <input type="checkbox"/> | <input type="checkbox"/> |
| Ibuprofen, nurofen, diclofenac, naproxen or other NSAID | <input type="checkbox"/> | <input type="checkbox"/> | <input type="checkbox"/> | <input type="checkbox"/> | <input type="checkbox"/> | <input type="checkbox"/> | <input type="checkbox"/> |
| Aspirin                                                 | <input type="checkbox"/> | <input type="checkbox"/> | <input type="checkbox"/> | <input type="checkbox"/> | <input type="checkbox"/> | <input type="checkbox"/> | <input type="checkbox"/> |
| Antibiotics                                             | <input type="checkbox"/> | <input type="checkbox"/> | <input type="checkbox"/> | <input type="checkbox"/> | <input type="checkbox"/> | <input type="checkbox"/> | <input type="checkbox"/> |
| Cold or flu remedies - over the counter                 | <input type="checkbox"/> | <input type="checkbox"/> | <input type="checkbox"/> | <input type="checkbox"/> | <input type="checkbox"/> | <input type="checkbox"/> | <input type="checkbox"/> |
| Vitamin Supplements                                     | <input type="checkbox"/> | <input type="checkbox"/> | <input type="checkbox"/> | <input type="checkbox"/> | <input type="checkbox"/> | <input type="checkbox"/> | <input type="checkbox"/> |
| Other (please describe)                                 | <input type="checkbox"/> | <input type="checkbox"/> | <input type="checkbox"/> | <input type="checkbox"/> | <input type="checkbox"/> | <input type="checkbox"/> | <input type="checkbox"/> |

Please specify:

---

Confidential

Page 20

**Isolation and Infection Control - [go\_arm\_1][hh1\_fname]**

[go\_arm\_1][hh1\_fname] [go\_arm\_1][hh1\_sname]: During the past week, on which days did you:

|                                                        | Mon                      | Tues                     | Wed                      | Thurs                    | Fri                      | Sat                      | Sun                      | None                     |
|--------------------------------------------------------|--------------------------|--------------------------|--------------------------|--------------------------|--------------------------|--------------------------|--------------------------|--------------------------|
| Leave the house/flat or garden                         | <input type="checkbox"/> | <input type="checkbox"/> | <input type="checkbox"/> | <input type="checkbox"/> | <input type="checkbox"/> | <input type="checkbox"/> | <input type="checkbox"/> | <input type="checkbox"/> |
| Wear a facemask or face covering outside the home      | <input type="checkbox"/> | <input type="checkbox"/> | <input type="checkbox"/> | <input type="checkbox"/> | <input type="checkbox"/> | <input type="checkbox"/> | <input type="checkbox"/> | <input type="checkbox"/> |
| Sleep in a room with no one else in it?                | <input type="checkbox"/> | <input type="checkbox"/> | <input type="checkbox"/> | <input type="checkbox"/> | <input type="checkbox"/> | <input type="checkbox"/> | <input type="checkbox"/> | <input type="checkbox"/> |
| Wear a face mask or face covering at home?             | <input type="checkbox"/> | <input type="checkbox"/> | <input type="checkbox"/> | <input type="checkbox"/> | <input type="checkbox"/> | <input type="checkbox"/> | <input type="checkbox"/> | <input type="checkbox"/> |
| Have a meal with other members of your household?      | <input type="checkbox"/> | <input type="checkbox"/> | <input type="checkbox"/> | <input type="checkbox"/> | <input type="checkbox"/> | <input type="checkbox"/> | <input type="checkbox"/> | <input type="checkbox"/> |
| Watch television with other members of your household? | <input type="checkbox"/> | <input type="checkbox"/> | <input type="checkbox"/> | <input type="checkbox"/> | <input type="checkbox"/> | <input type="checkbox"/> | <input type="checkbox"/> | <input type="checkbox"/> |

[go\_arm\_1][hh1\_fname] [go\_arm\_1][hh1\_sname]: During your illness, what best describes your approach to preventing spread of infection in the household?

- I did not think my illness was COVID-19, so I did not take any special precautions  
 I thought it would spread whatever I did so did not take special precautions  
 I was worried about the illness spreading to others in the household so did what I could to stop this  
 None of the above

[go\_arm\_1][hh1\_fname] [go\_arm\_1][hh1\_sname]: Since your illness started, on which days did OTHER MEMBERS OF YOUR HOUSEHOLD:

|                                                                | Mon                      | Tues                     | Wed                      | Thur                     | Fri                      | Sat                      | Sun                      | None                     |
|----------------------------------------------------------------|--------------------------|--------------------------|--------------------------|--------------------------|--------------------------|--------------------------|--------------------------|--------------------------|
| Wear a face mask or face covering when in the same room as you | <input type="checkbox"/> | <input type="checkbox"/> | <input type="checkbox"/> | <input type="checkbox"/> | <input type="checkbox"/> | <input type="checkbox"/> | <input type="checkbox"/> | <input type="checkbox"/> |
| Leave the house/flat or garden at all                          | <input type="checkbox"/> | <input type="checkbox"/> | <input type="checkbox"/> | <input type="checkbox"/> | <input type="checkbox"/> | <input type="checkbox"/> | <input type="checkbox"/> | <input type="checkbox"/> |
| Go to work                                                     | <input type="checkbox"/> | <input type="checkbox"/> | <input type="checkbox"/> | <input type="checkbox"/> | <input type="checkbox"/> | <input type="checkbox"/> | <input type="checkbox"/> | <input type="checkbox"/> |
| Wear a facemask or face covering outside the home              | <input type="checkbox"/> | <input type="checkbox"/> | <input type="checkbox"/> | <input type="checkbox"/> | <input type="checkbox"/> | <input type="checkbox"/> | <input type="checkbox"/> | <input type="checkbox"/> |

[go\_arm\_1][hh1\_fname] [go\_arm\_1][hh1\_sname]: Why did other household members leave the house? Please select all that apply

- They did not think my symptoms were related to COVID-19  
 They did not think there was any need for people without symptoms to stay at home  
 They needed to go out to earn money  
 They needed to go out to an important meeting  
 Other reason

Confidential

Page 21

During your illness, how frequently have you washed your hands thoroughly and regularly with soap and water

- Not at all  
 1 or 2 times a day  
 3 or 4 times a day  
 5 or 6 times a day  
 7 or 8 times a day  
 9 or 10 times a day  
 More than 10 times a day

During your illness, on average, how frequently have you (or someone else) disinfected surfaces you might touch?  
Such as door knobs or hard surfaces

- Several times a day  
 Daily  
 Less than daily  
 Never

[go\_arm\_1][hh1\_fname] [go\_arm\_1][hh1\_sname]: During your illness, how frequently have you:

|                                                                 | Not applicable        | Almost always         | Most of the time      | Sometimes             | Rarely                | Never                 |
|-----------------------------------------------------------------|-----------------------|-----------------------|-----------------------|-----------------------|-----------------------|-----------------------|
| Washed your hands after blowing your nose, sneezing or coughing | <input type="radio"/> | <input type="radio"/> | <input type="radio"/> | <input type="radio"/> | <input type="radio"/> | <input type="radio"/> |
| Used tissues when sneezing or coughing                          | <input type="radio"/> | <input type="radio"/> | <input type="radio"/> | <input type="radio"/> | <input type="radio"/> | <input type="radio"/> |
| Put tissues in the bin immediately after use                    | <input type="radio"/> | <input type="radio"/> | <input type="radio"/> | <input type="radio"/> | <input type="radio"/> | <input type="radio"/> |

Confidential

Page 22

---

**Thank You**

Please click submit to continue
